# Supplementary material
Source: PubMed Central journal article supplement (PMC8370032)
Supplement: NIHMS1728257-supplement-1.pdf [file NIHMS1728257-supplement-1.pdf]

Impact of  $\alpha$ -modifications on the activity of triazole bisphosphonates as geranylgeranyl  
diphosphate synthase inhibitors

Alisa E. R. Fairweather,<sup>a</sup> Daniel B. Goetz,<sup>a</sup> Chloe M. Schroeder,<sup>a</sup> Nazmul H.

Bhuiyan,<sup>a</sup> Michelle L. Varney,<sup>b</sup> David F. Wiemer<sup>a,c</sup> and Sarah A. Holstein<sup>b\*</sup>

<sup>a</sup>*Department of Chemistry, University of Iowa, Iowa City, IA 52242-1294, US*

<sup>b</sup>*Department of Internal Medicine, University of Nebraska Medical Center, Omaha, NE 68198,*

*US*

<sup>c</sup>*Department of Pharmacology, University of Iowa, Iowa City, IA 52242-1109, US*

*sarah.holstein@unmc.edu*

Table of Contents

|                                                                                       |    |
|---------------------------------------------------------------------------------------|----|
| <sup>1</sup> H NMR Spectrum of Compound <b>6</b> (CDCl <sub>3</sub> , 400 MHz).....   | 4  |
| <sup>13</sup> C NMR Spectrum of Compound <b>6</b> (CDCl <sub>3</sub> , 100 MHz).....  | 5  |
| <sup>31</sup> P NMR Spectrum of Compound <b>6</b> (CDCl <sub>3</sub> , 162 MHz).....  | 6  |
| <sup>1</sup> H NMR Spectrum of Compound <b>7</b> (D <sub>2</sub> O, 400 MHz).....     | 7  |
| <sup>31</sup> P NMR Spectrum of Compound <b>7</b> (D <sub>2</sub> O, 400 MHz).....    | 8  |
| <sup>1</sup> H NMR Spectrum of Compound <b>10</b> (CDCl <sub>3</sub> , 400 MHz).....  | 9  |
| <sup>13</sup> C NMR Spectrum of Compound <b>10</b> (CDCl <sub>3</sub> , 100 MHz)..... | 10 |
| <sup>31</sup> P NMR Spectrum of Compound <b>10</b> (CDCl <sub>3</sub> , 162 MHz)..... | 11 |
| <sup>1</sup> H NMR Spectrum of Compound <b>11</b> (D <sub>2</sub> O, 400 MHz).....    | 12 |
| <sup>13</sup> C NMR Spectrum of Compound <b>11</b> (D <sub>2</sub> O, 100 MHz).....   | 13 |
| <sup>31</sup> P NMR Spectrum of Compound <b>11</b> (D <sub>2</sub> O, 162 MHz).....   | 14 |
| <sup>1</sup> H NMR Spectrum of Compound <b>9</b> (CDCl <sub>3</sub> , 500 MHz).....   | 15 |
| <sup>13</sup> C NMR Spectrum of Compound <b>9</b> (CDCl <sub>3</sub> , 126 MHz).....  | 16 |
| <sup>31</sup> P NMR Spectrum of Compound <b>9</b> (CDCl <sub>3</sub> , 202 MHz).....  | 17 |
| <sup>1</sup> H NMR Spectrum of Compound <b>16</b> (CDCl <sub>3</sub> , 400 MHz).....  | 18 |
| <sup>13</sup> C NMR Spectrum of Compound <b>16</b> (CDCl <sub>3</sub> , 100 MHz)..... | 19 |
| <sup>31</sup> P NMR Spectrum of Compound <b>16</b> (CDCl <sub>3</sub> , 162 MHz)..... | 20 |
| <sup>1</sup> H NMR Spectrum of Compound <b>17</b> (D <sub>2</sub> O, 400 MHz).....    | 21 |
| <sup>13</sup> C NMR Spectrum of Compound <b>17</b> (D <sub>2</sub> O, 100 MHz).....   | 22 |

|                                                                                         |    |
|-----------------------------------------------------------------------------------------|----|
| <sup>31</sup> P NMR Spectrum of Compound <b>17</b> (D <sub>2</sub> O, 162 MHz) .....    | 23 |
| <sup>1</sup> H NMR Spectrum of Compound <b>19</b> (CDCl <sub>3</sub> , 400 MHz) .....   | 24 |
| <sup>13</sup> C NMR Spectrum of Compound <b>19</b> (CDCl <sub>3</sub> , 100 MHz) .....  | 25 |
| <sup>1</sup> H NMR Spectrum of Compound <b>20</b> (CDCl <sub>3</sub> , 400 MHz) .....   | 26 |
| <sup>13</sup> C NMR Spectrum of Compound <b>20</b> (CDCl <sub>3</sub> , 100 MHz) .....  | 27 |
| <sup>1</sup> H NMR Spectrum of Compound <b>21</b> (MeOD, 400 MHz) .....                 | 28 |
| <sup>13</sup> C NMR Spectrum of Compound <b>21</b> (MeOD, 100 MHz) .....                | 29 |
| <sup>1</sup> H NMR Spectrum of Compound <b>22</b> (CDCl <sub>3</sub> , 400 MHz) .....   | 30 |
| <sup>13</sup> C NMR Spectrum of Compound <b>22</b> (CDCl <sub>3</sub> , 75.5 MHz) ..... | 31 |
| <sup>1</sup> H NMR Spectrum of Compound <b>24</b> (CDCl <sub>3</sub> , 400 MHz) .....   | 32 |
| <sup>13</sup> C NMR Spectrum of Compound <b>24</b> (CDCl <sub>3</sub> , 100 MHz) .....  | 33 |
| <sup>1</sup> H NMR Spectrum of Compound <b>25</b> (CDCl <sub>3</sub> , 400 MHz) .....   | 34 |
| <sup>13</sup> C NMR Spectrum of Compound <b>25</b> (CDCl <sub>3</sub> , 100 MHz) .....  | 35 |
| <sup>1</sup> H NMR Spectrum of Compound <b>26</b> (CDCl <sub>3</sub> , 500 MHz) .....   | 36 |
| <sup>13</sup> C NMR Spectrum of Compound <b>26</b> (CDCl <sub>3</sub> , 126 MHz) .....  | 37 |
| <sup>31</sup> P NMR Spectrum of Compound <b>26</b> (CDCl <sub>3</sub> , 202 MHz) .....  | 38 |
| <sup>1</sup> H NMR Spectrum of Compound <b>27</b> (D <sub>2</sub> O, 500 MHz) .....     | 39 |
| <sup>13</sup> C NMR Spectrum of Compound <b>27</b> (D <sub>2</sub> O, 126 MHz) .....    | 40 |
| <sup>31</sup> P NMR Spectrum of Compound <b>27</b> D <sub>2</sub> O, 202 MHz) .....     | 41 |
| <sup>1</sup> H NMR Spectrum of Compound <b>28</b> (CDCl <sub>3</sub> , 300 MHz) .....   | 42 |
| <sup>13</sup> C NMR Spectrum of Compound <b>28</b> (CDCl <sub>3</sub> , 75.5 MHz) ..... | 43 |
| <sup>31</sup> P NMR Spectrum of Compound <b>28</b> (CDCl <sub>3</sub> , 122 MHz) .....  | 44 |
| <sup>1</sup> H NMR Spectrum of Compound <b>29</b> (D <sub>2</sub> O, 400 MHz) .....     | 45 |
| <sup>13</sup> C NMR Spectrum of Compound <b>29</b> (D <sub>2</sub> O, 100 MHz) .....    | 46 |
| <sup>31</sup> P NMR Spectrum of Compound <b>29</b> (D <sub>2</sub> O, 162 MHz) .....    | 47 |
| <sup>1</sup> H NMR Spectrum of Compound <b>30</b> (CDCl <sub>3</sub> , 400 MHz) .....   | 48 |
| <sup>13</sup> C NMR Spectrum of Compound <b>30</b> (CDCl <sub>3</sub> , 100 MHz) .....  | 49 |
| <sup>31</sup> P NMR Spectrum of Compound <b>30</b> (CDCl <sub>3</sub> , 162 MHz) .....  | 50 |
| <sup>1</sup> H NMR Spectrum of Compound <b>31</b> (D <sub>2</sub> O, 400 MHz) .....     | 51 |
| <sup>13</sup> C NMR Spectrum of Compound <b>31</b> (D <sub>2</sub> O, 100 MHz) .....    | 52 |
| <sup>31</sup> P NMR Spectrum of Compound <b>31</b> (D <sub>2</sub> O, 162 MHz) .....    | 53 |
| <sup>1</sup> H NMR Spectrum of Compound <b>34</b> (D <sub>2</sub> O, 500 MHz) .....     | 54 |
| <sup>13</sup> C NMR Spectrum of Compound <b>34</b> (D <sub>2</sub> O, 100 MHz) .....    | 55 |
| <sup>31</sup> P NMR Spectrum of Compound <b>34</b> (D <sub>2</sub> O, 162 MHz) .....    | 56 |
| <sup>1</sup> H NMR Spectrum of Compound <b>37</b> (D <sub>2</sub> O, 500 MHz) .....     | 57 |
| <sup>13</sup> C NMR Spectrum of Compound <b>37</b> (D <sub>2</sub> O, 126 MHz) .....    | 58 |
| <sup>31</sup> P NMR Spectrum of Compound <b>37</b> (D <sub>2</sub> O, 202 MHz) .....    | 59 |
| HPLC trace of Compound <b>11</b> .....                                                  | 60 |
| HPLC trace of Compound <b>17</b> .....                                                  | 61 |

|                                        |    |
|----------------------------------------|----|
| HPLC trace of Compound <b>27</b> ..... | 62 |
| HPLC trace of Compound <b>29</b> ..... | 63 |
| HPLC trace of Compound <b>31</b> ..... | 64 |
| HPLC trace of Compound <b>37</b> ..... | 65 |

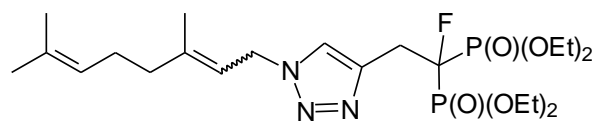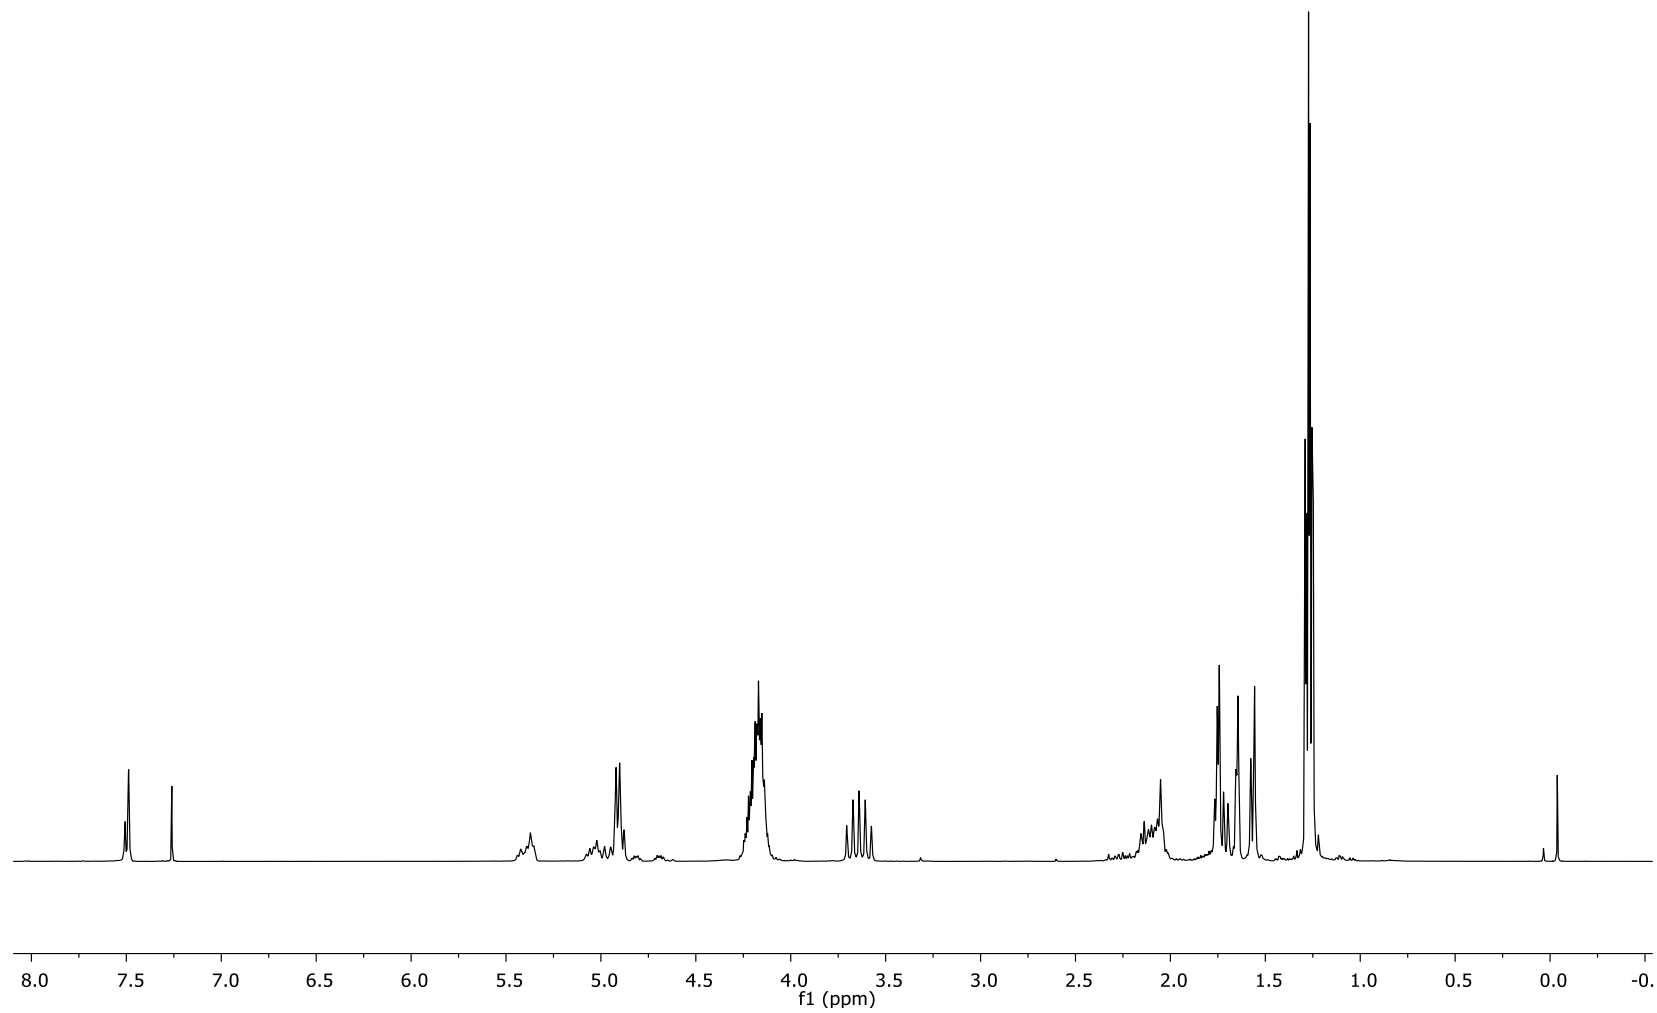

$^1\text{H}$  NMR Spectrum of Compound **6** ( $\text{CDCl}_3$ , 400 MHz)

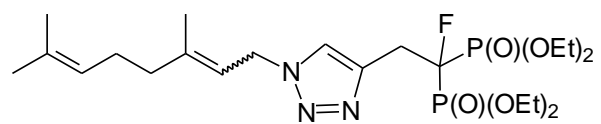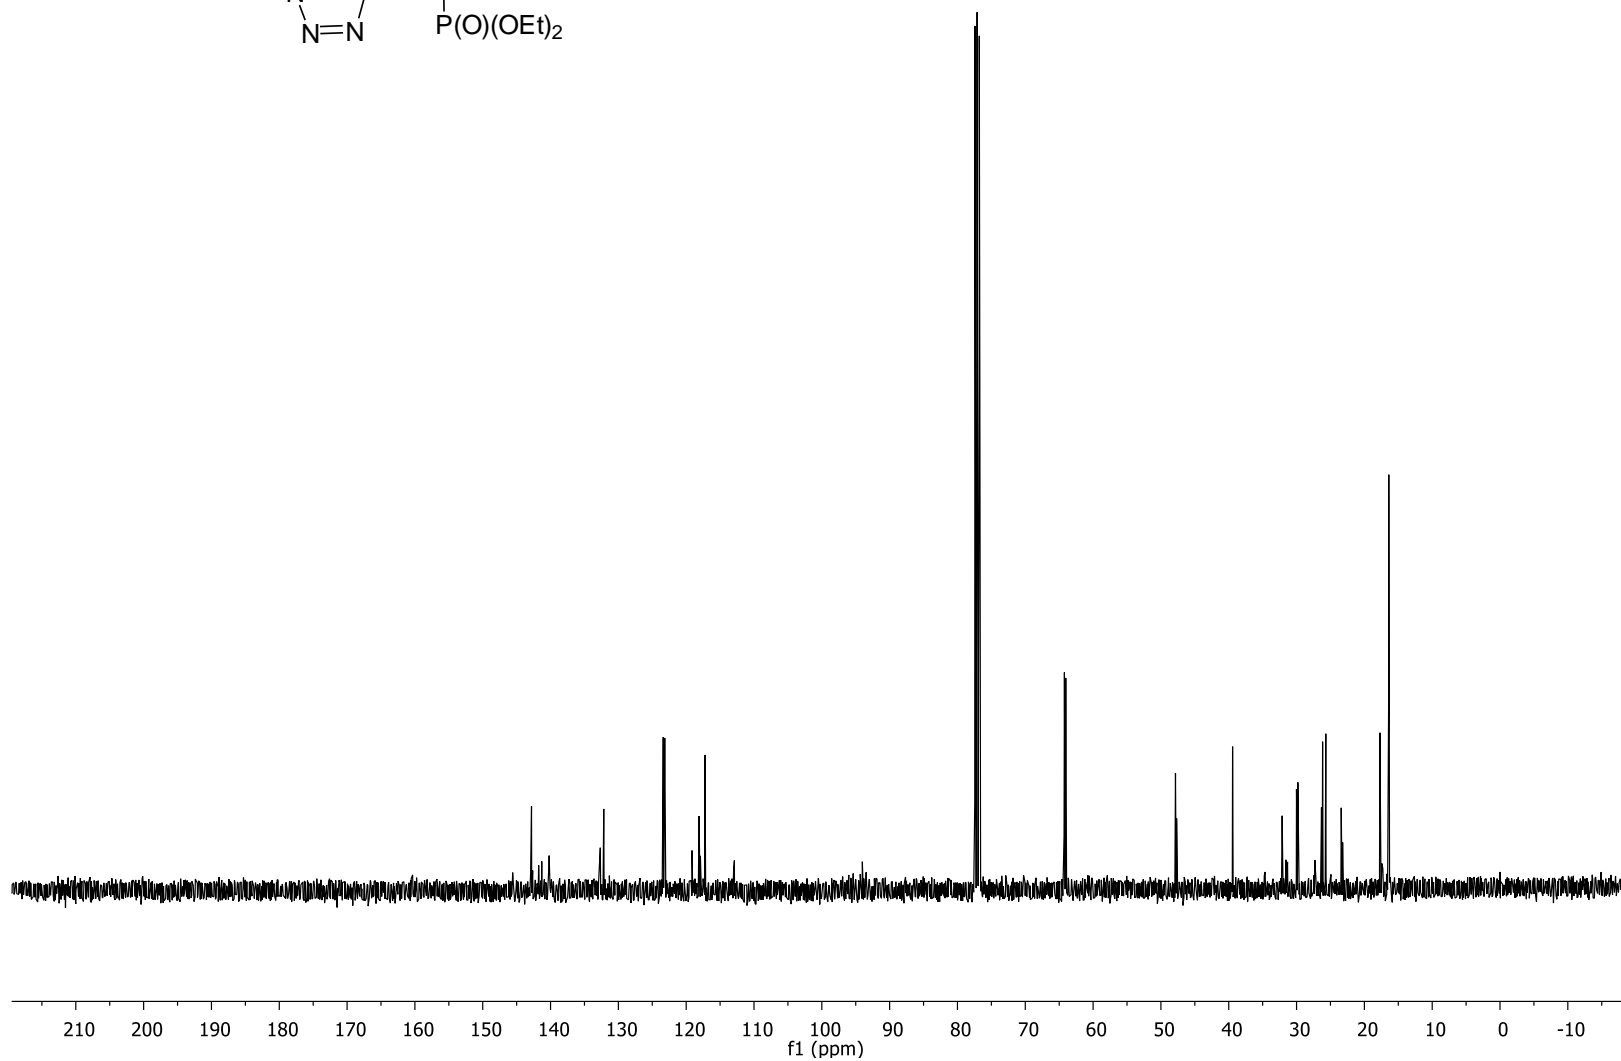

<sup>13</sup>C NMR Spectrum of Compound 6 (CDCl<sub>3</sub>, 100 MHz)

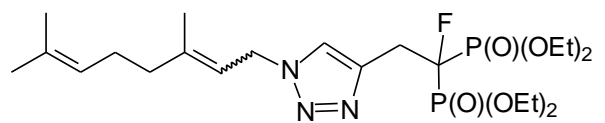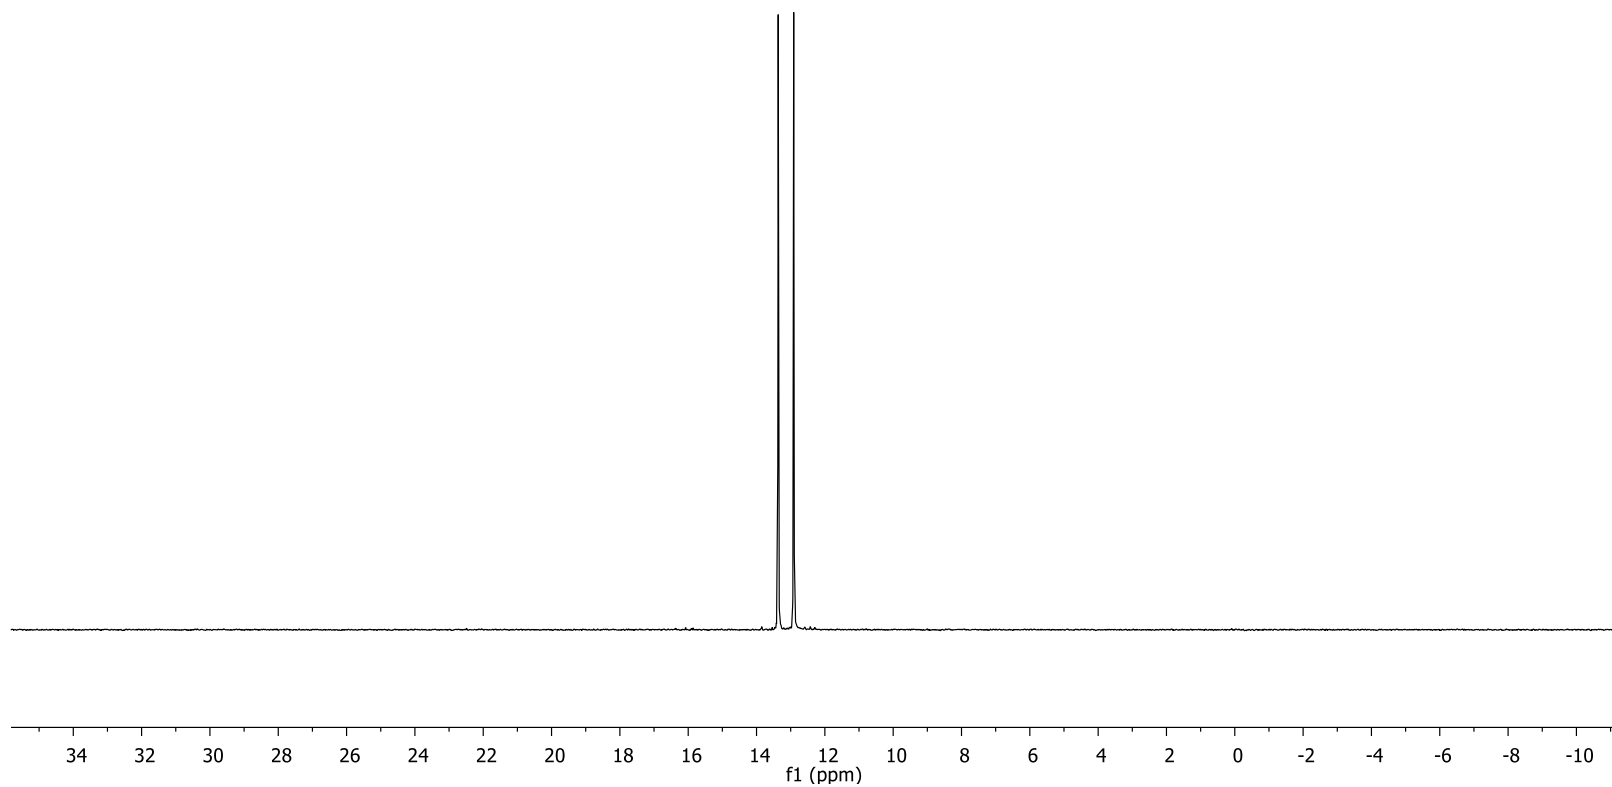

$^{31}\text{P}$  NMR Spectrum of Compound **6** ( $\text{CDCl}_3$ , 162 MHz)

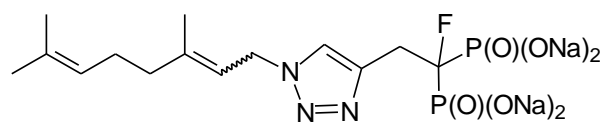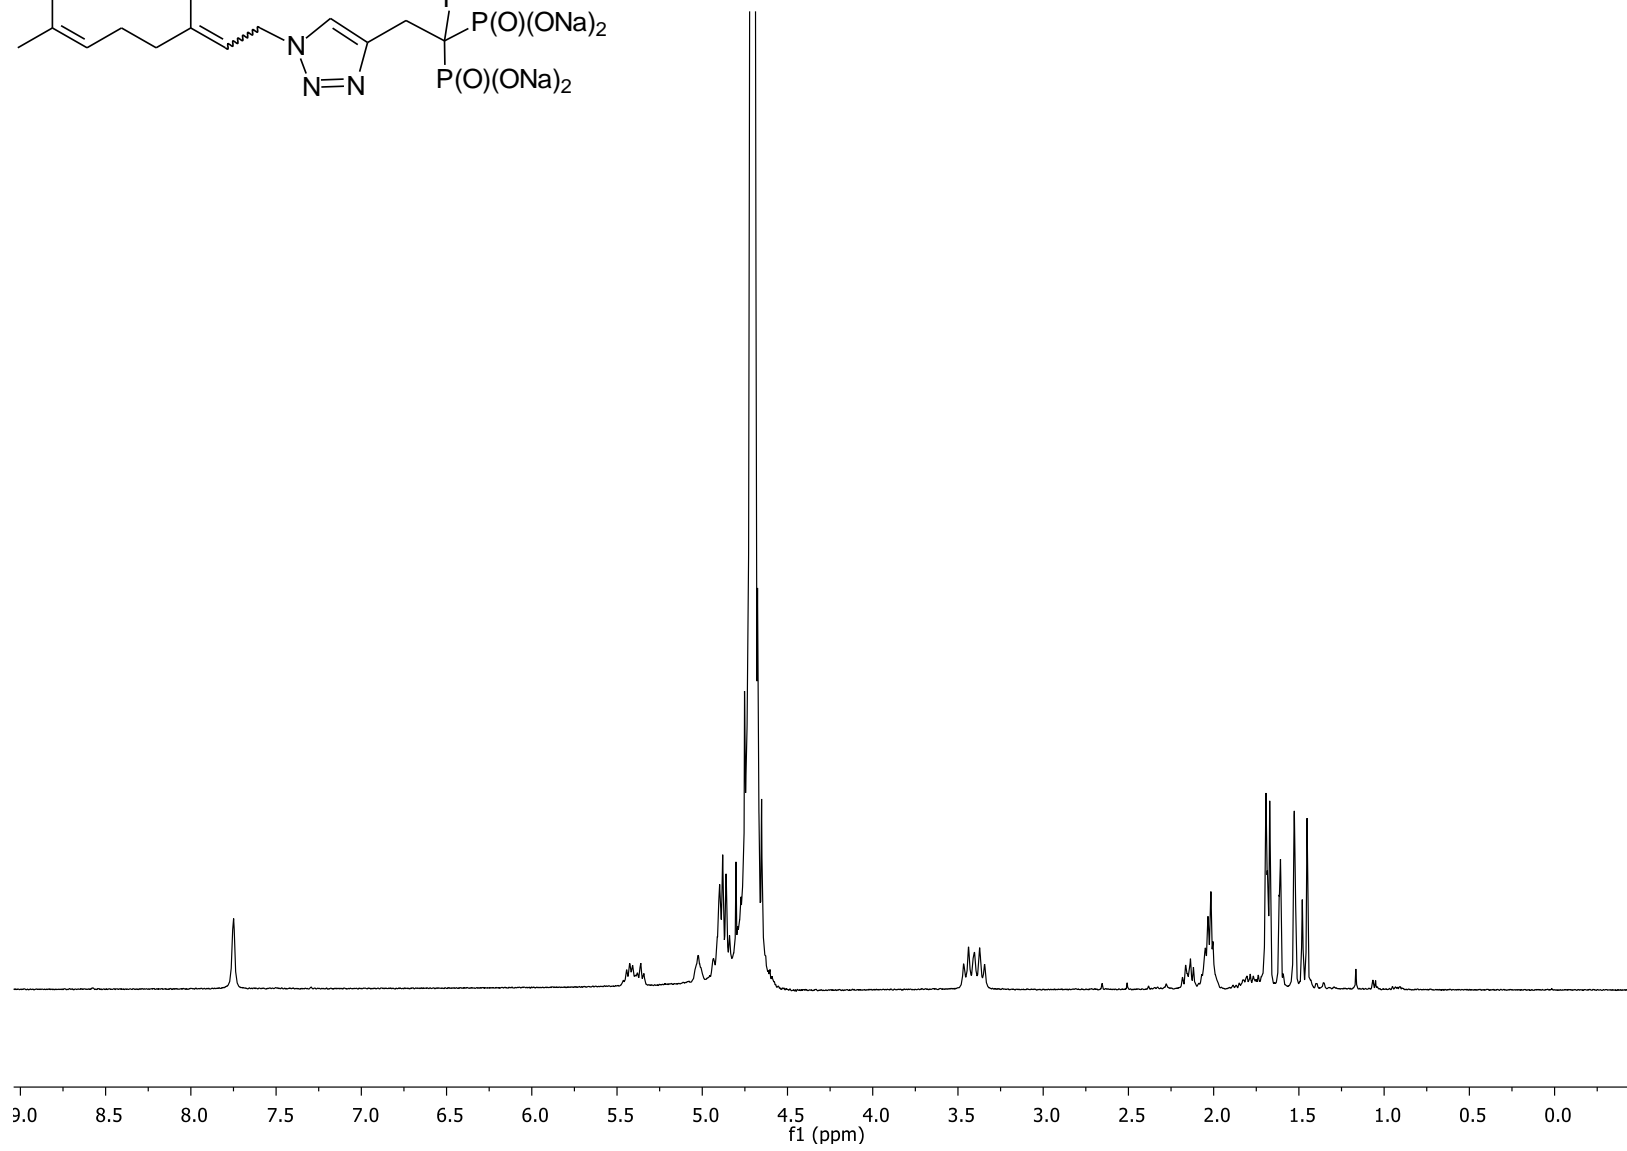

<sup>1</sup>H NMR Spectrum of Compound 7 (D<sub>2</sub>O, 400 MHz)

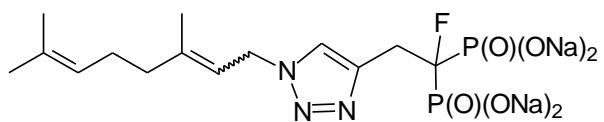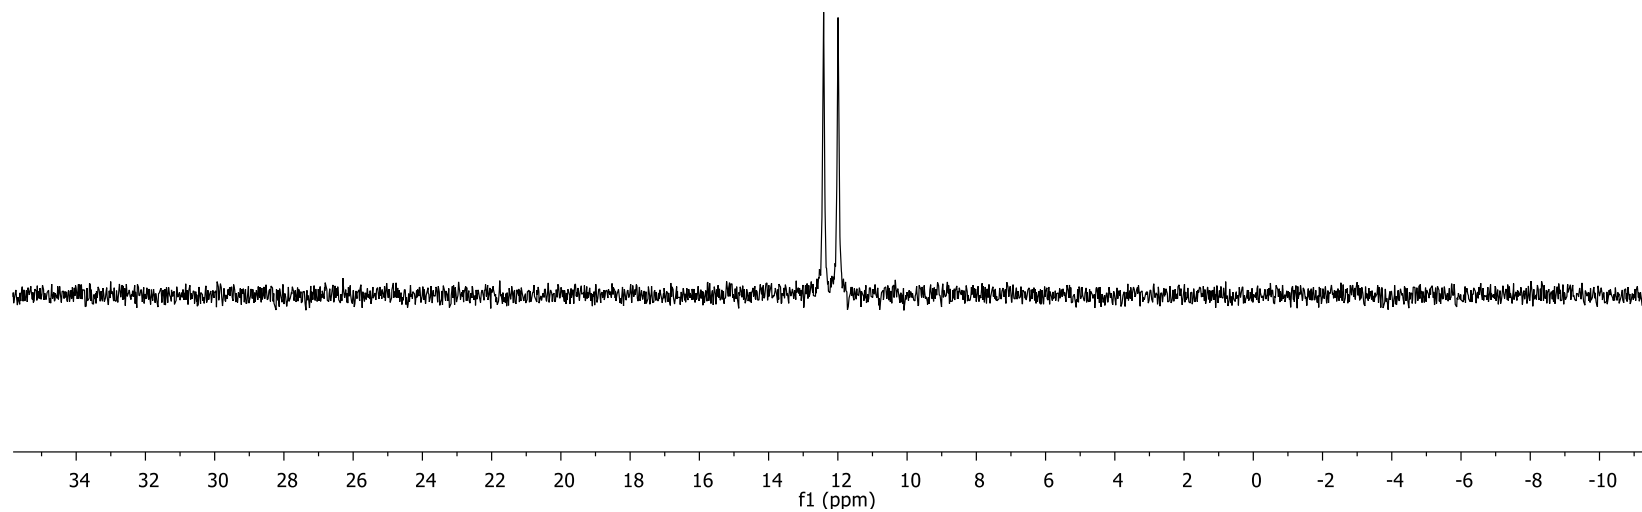

$^{31}\text{P}$  NMR Spectrum of Compound 7 ( $\text{D}_2\text{O}$ , 400 MHz)



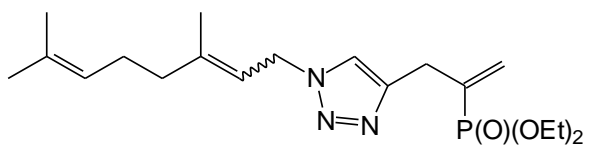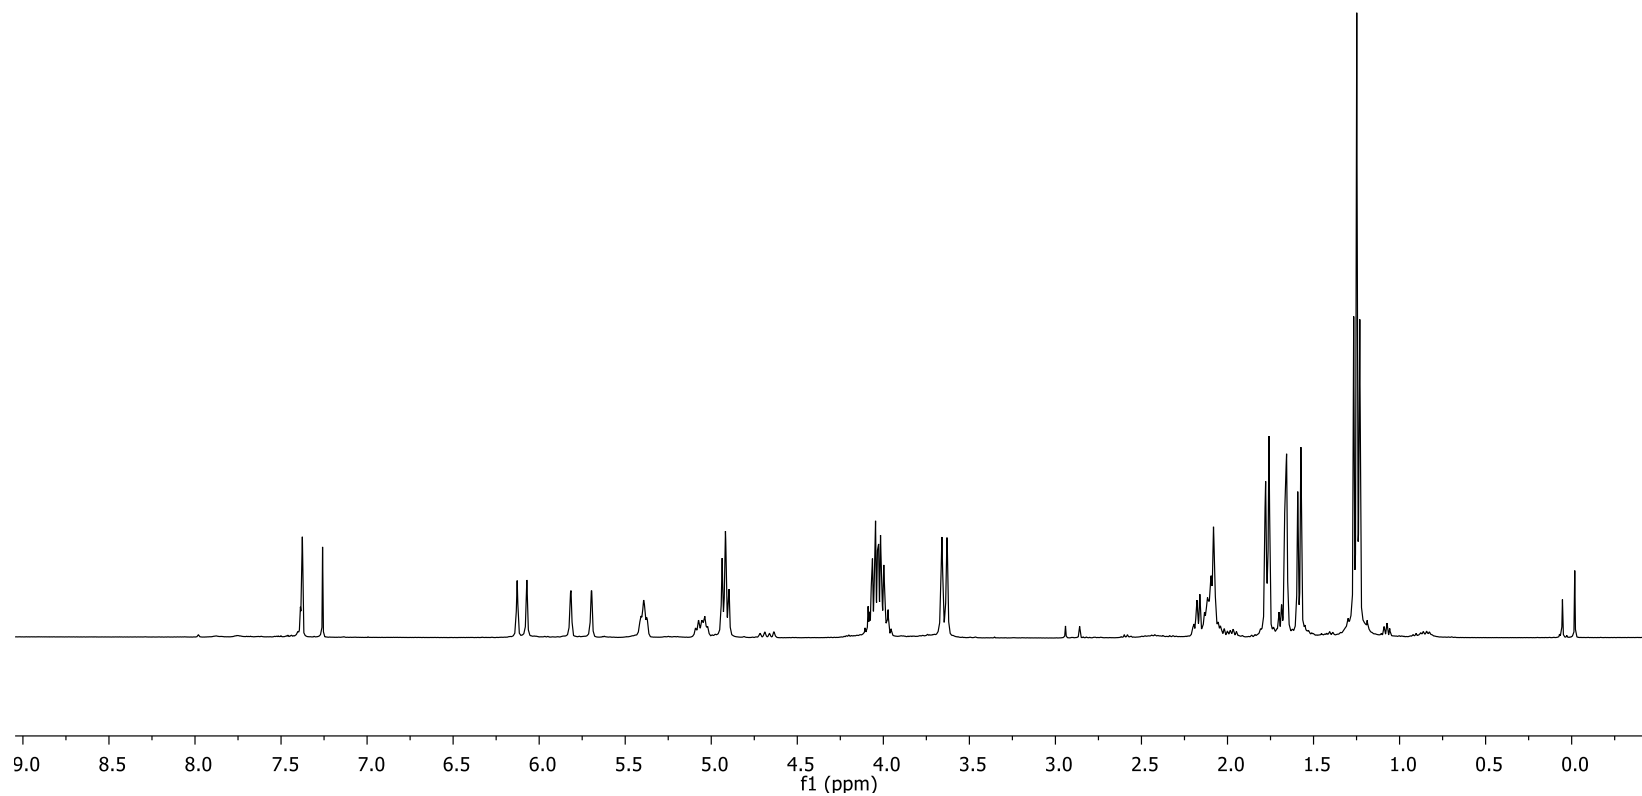

<sup>1</sup>H NMR Spectrum of Compound **10** (CDCl<sub>3</sub>, 400 MHz)

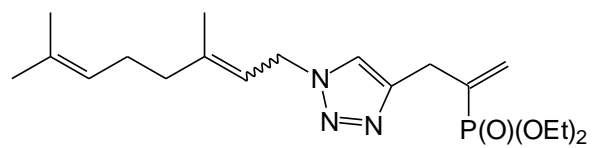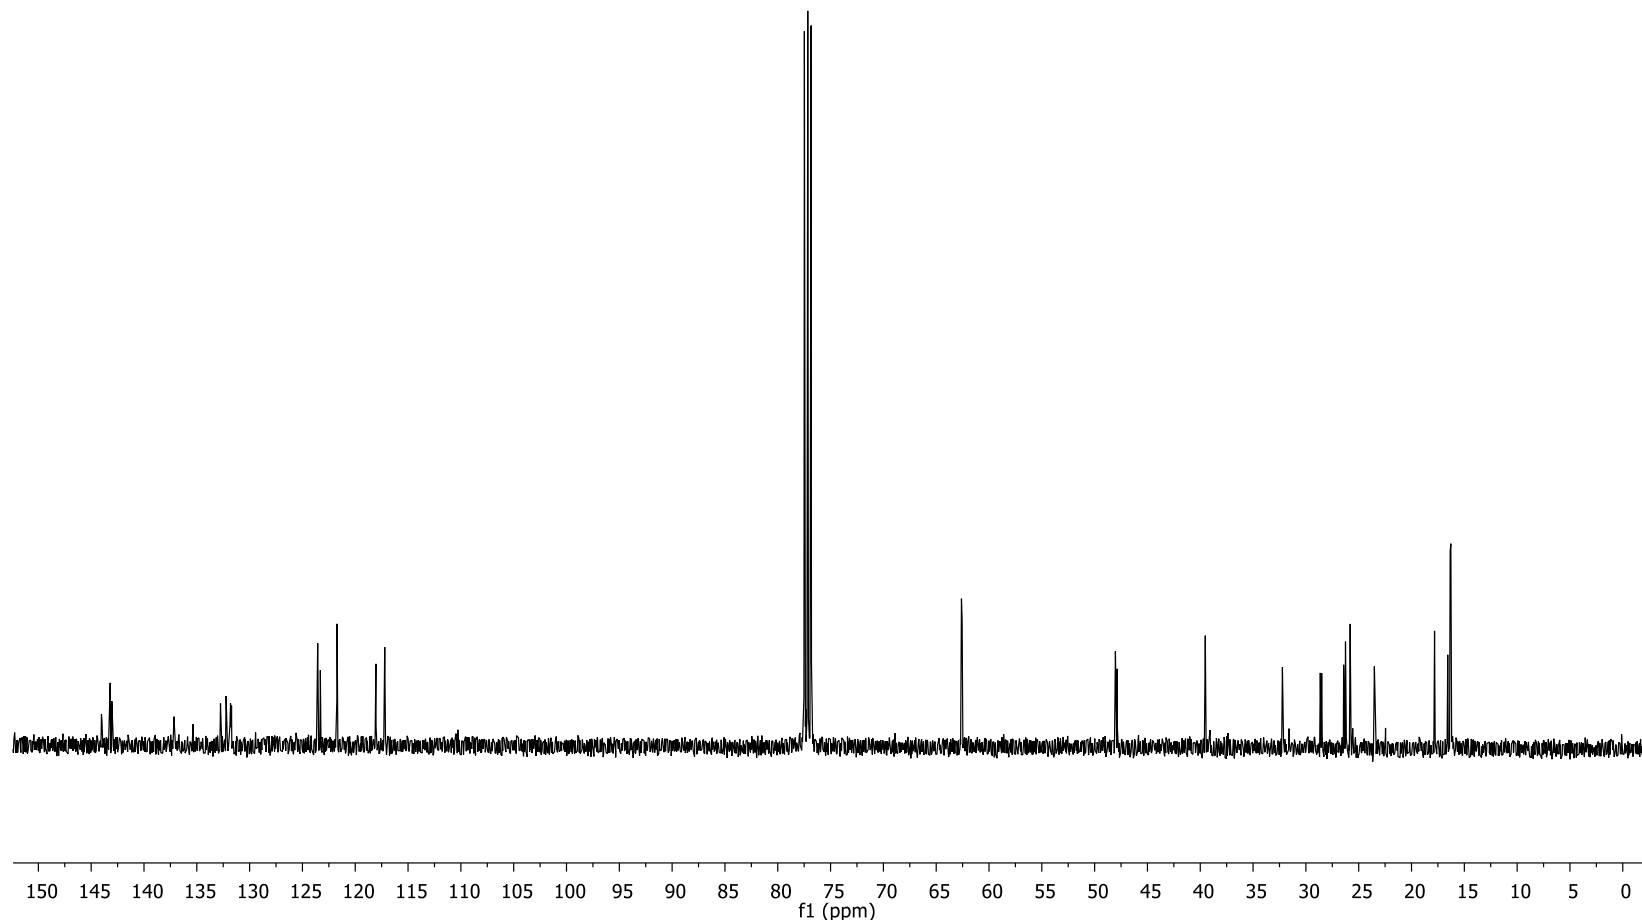

<sup>13</sup>C NMR Spectrum of Compound **10** (CDCl<sub>3</sub>, 100 MHz)

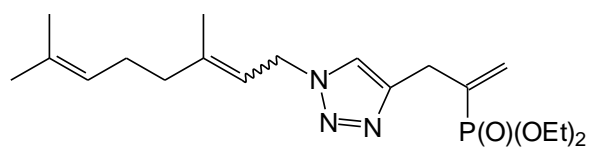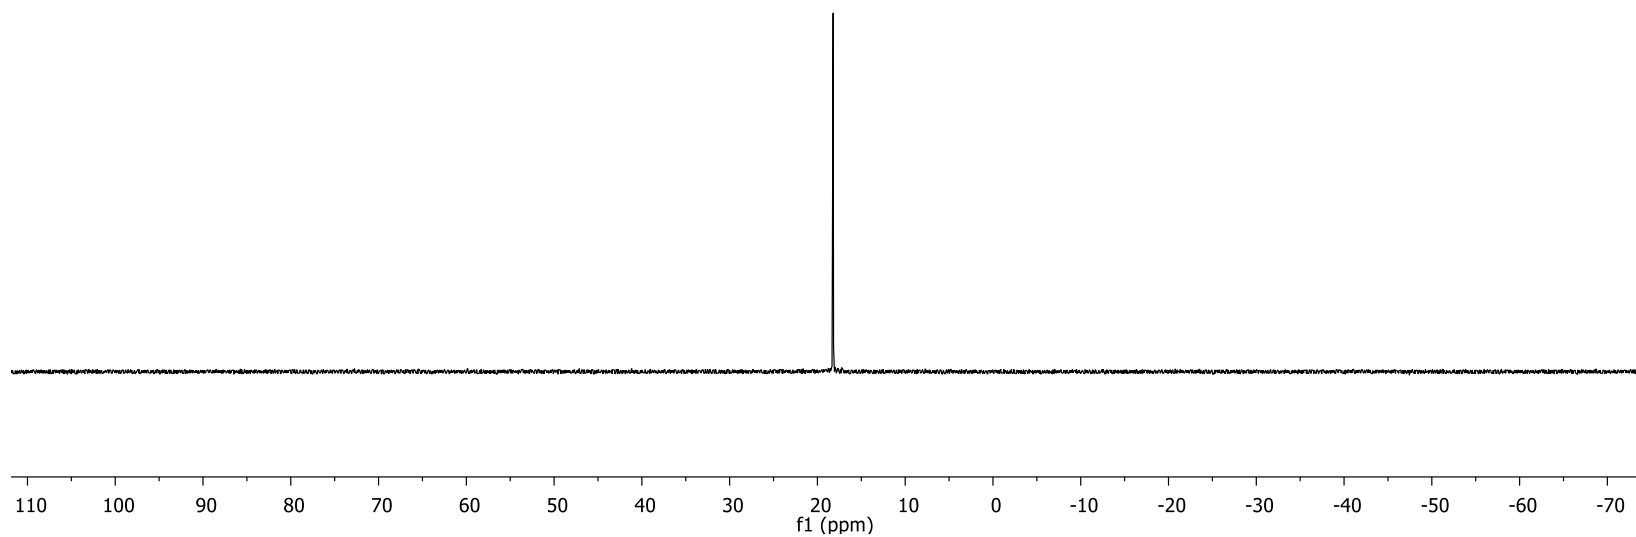

$^{31}\text{P}$  NMR Spectrum of Compound **10** ( $\text{CDCl}_3$ , 162 MHz)

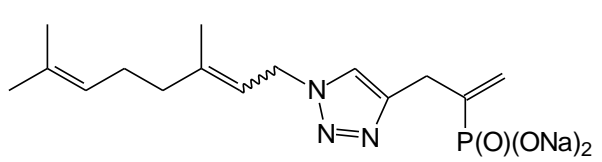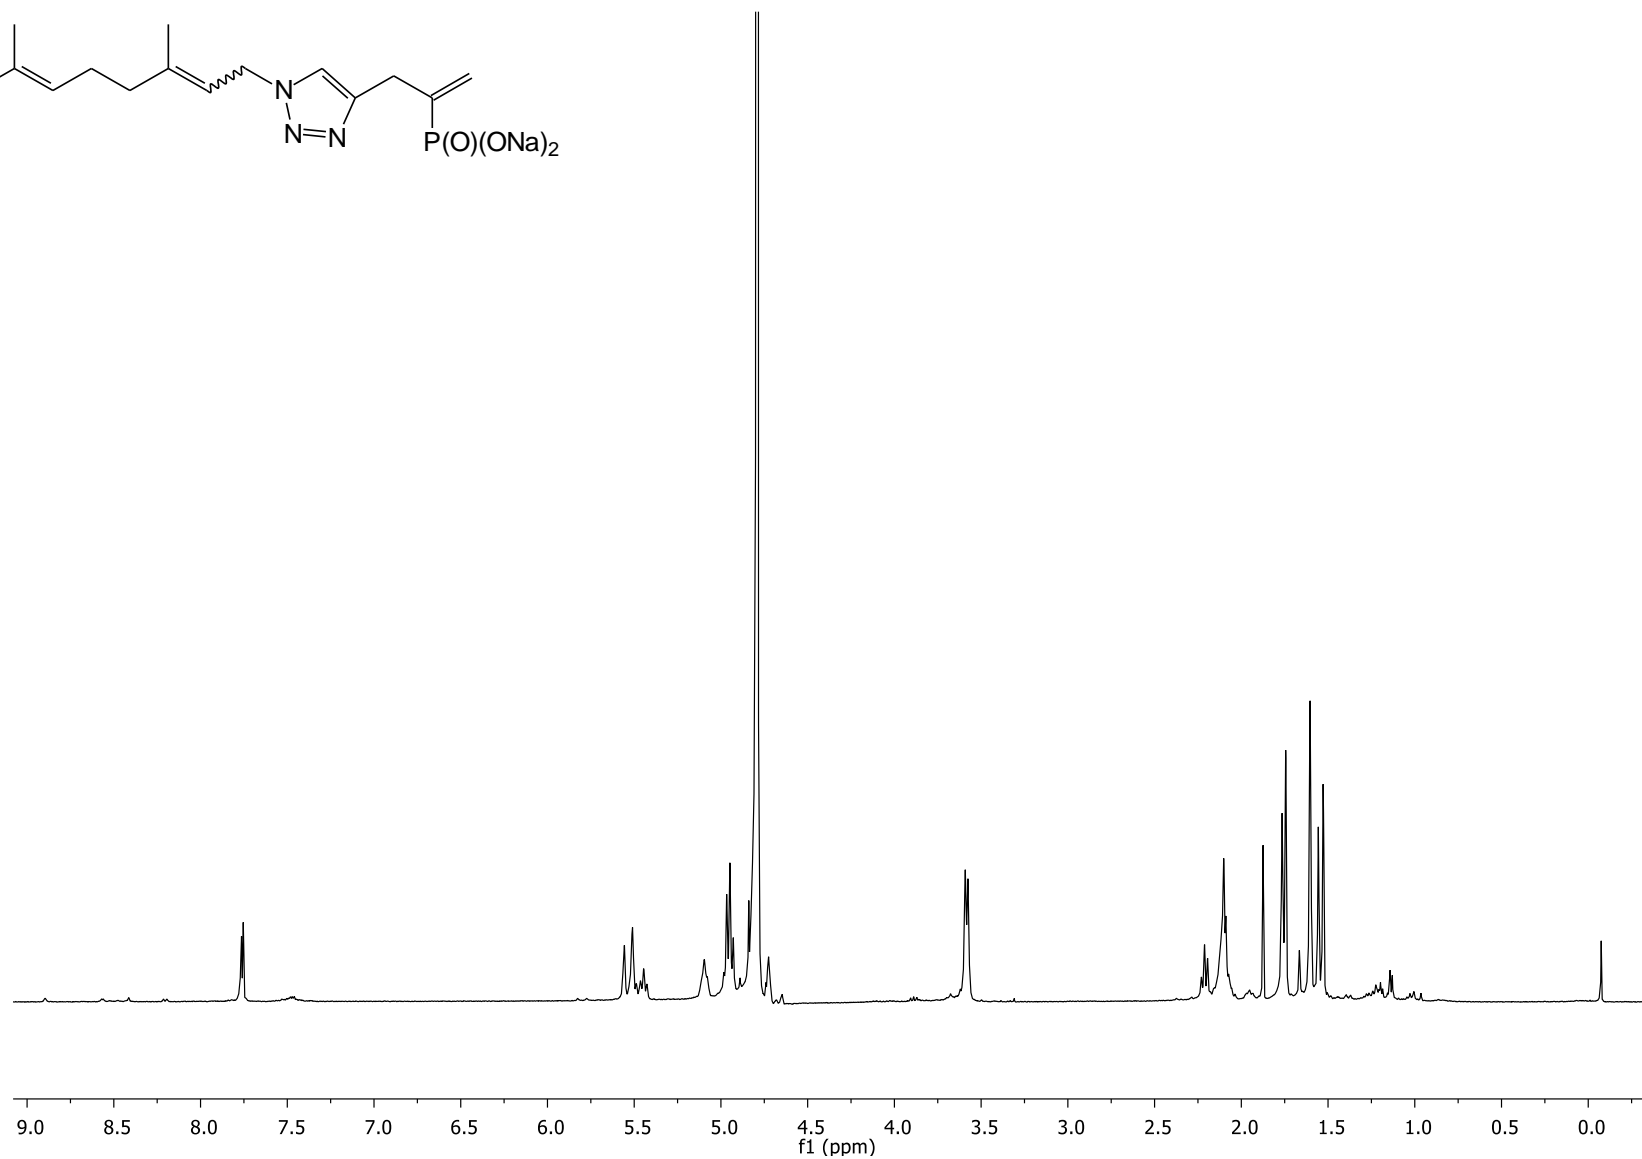

<sup>1</sup>H NMR Spectrum of Compound **11** (D<sub>2</sub>O, 400 MHz)

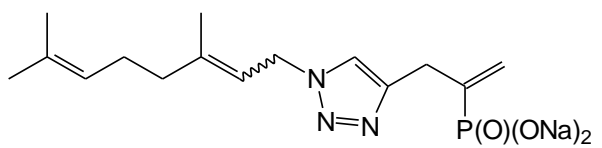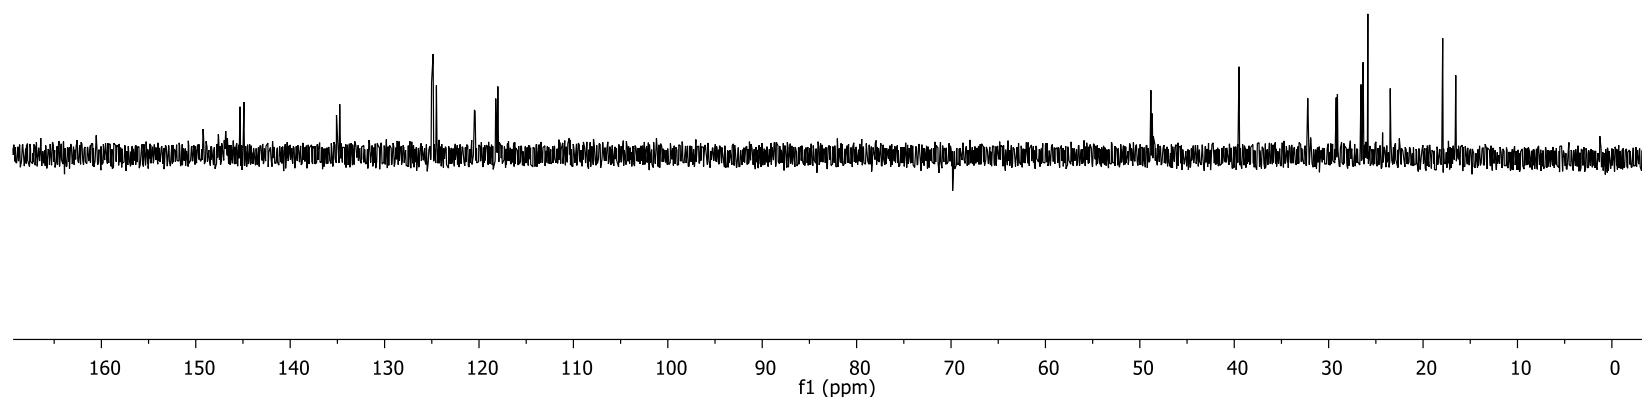

<sup>13</sup>C NMR Spectrum of Compound 11 (D<sub>2</sub>O, 100 MHz)

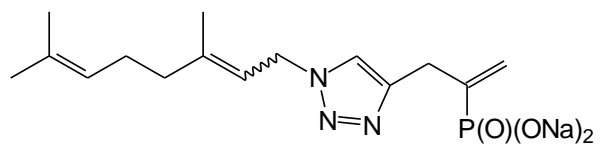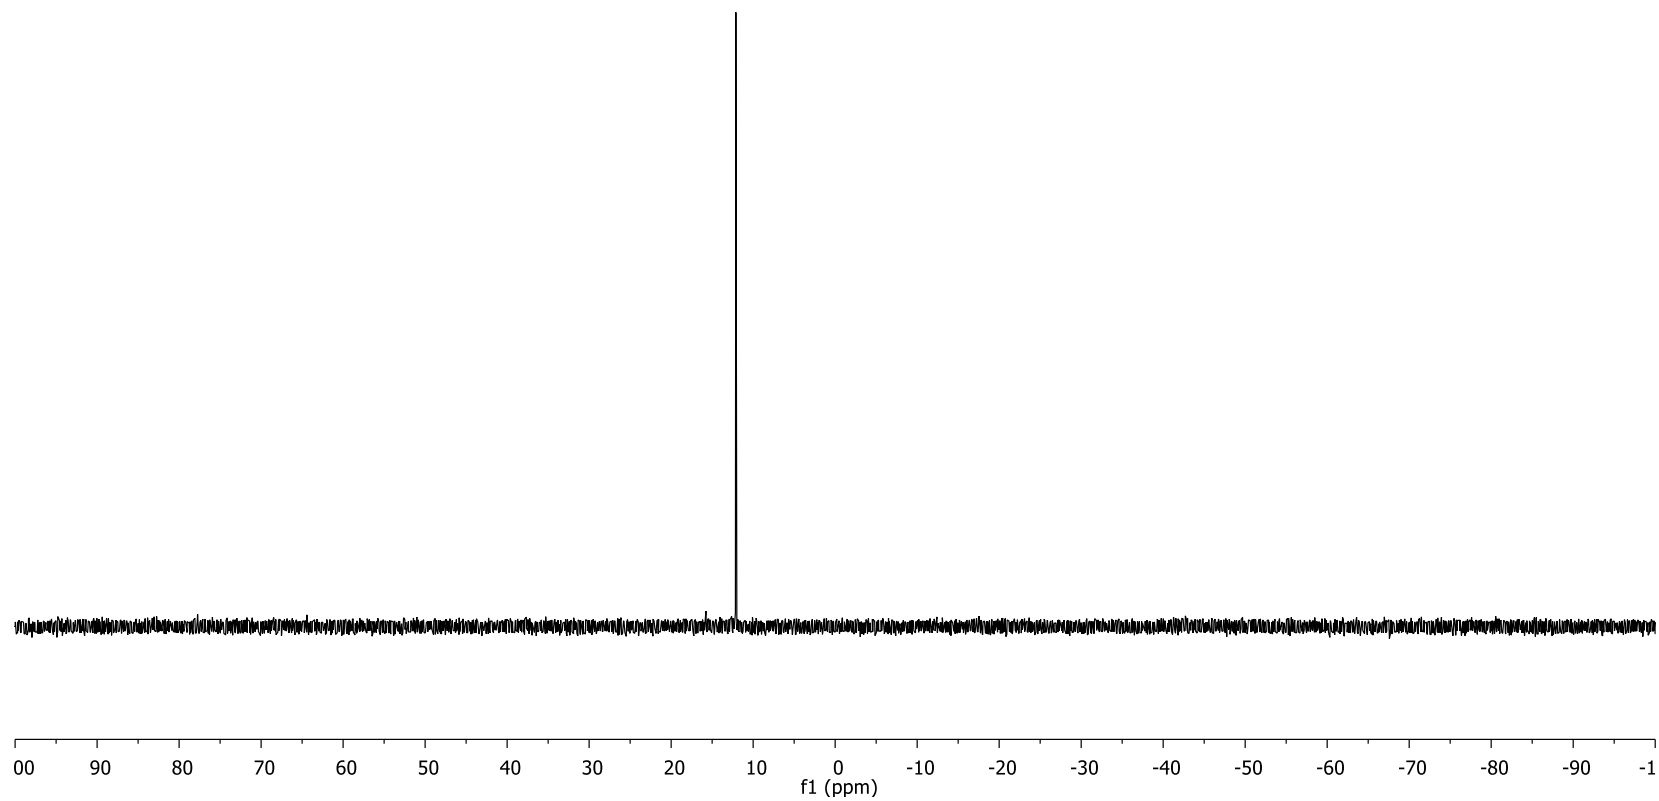

<sup>31</sup>P NMR Spectrum of Compound 11 (D<sub>2</sub>O, 162 MHz)

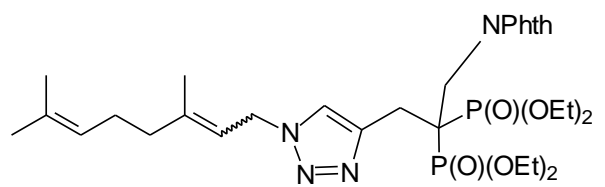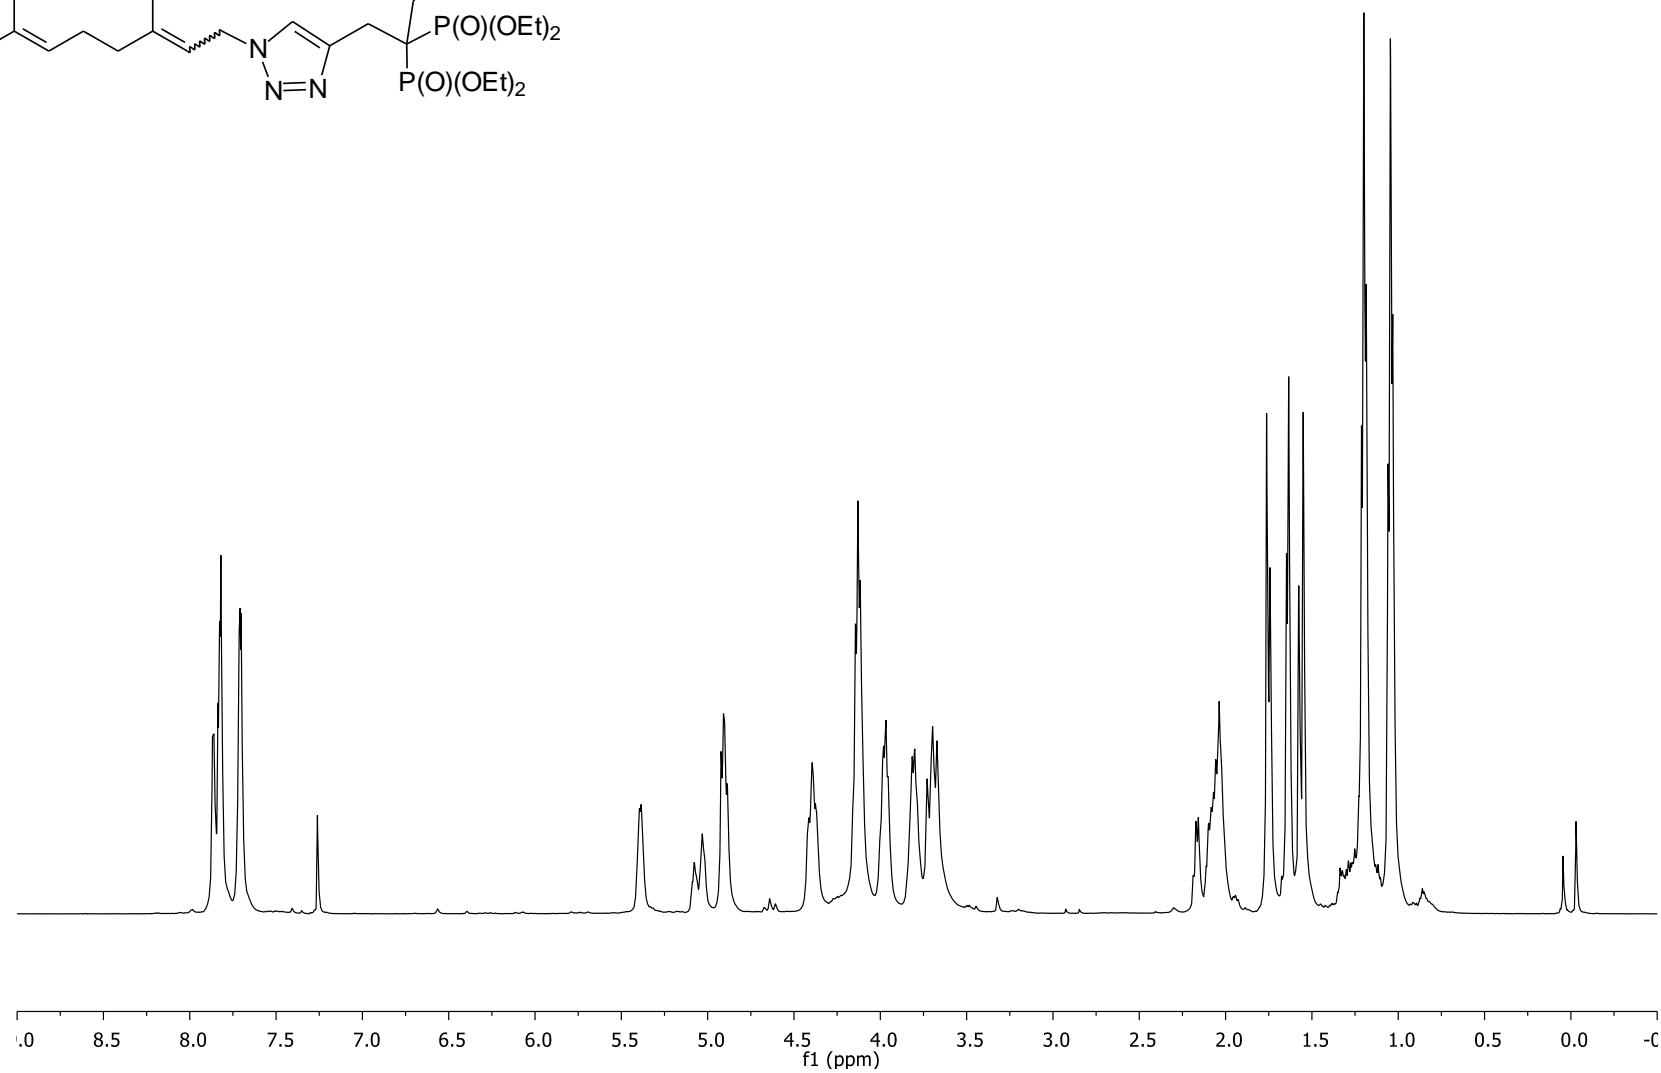

<sup>1</sup>H NMR Spectrum of Compound 9 (CDCl<sub>3</sub>, 500 MHz)

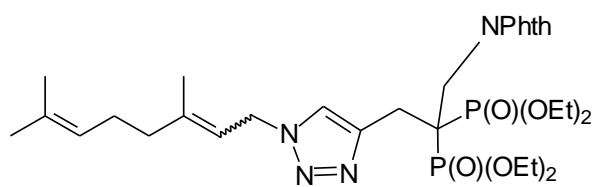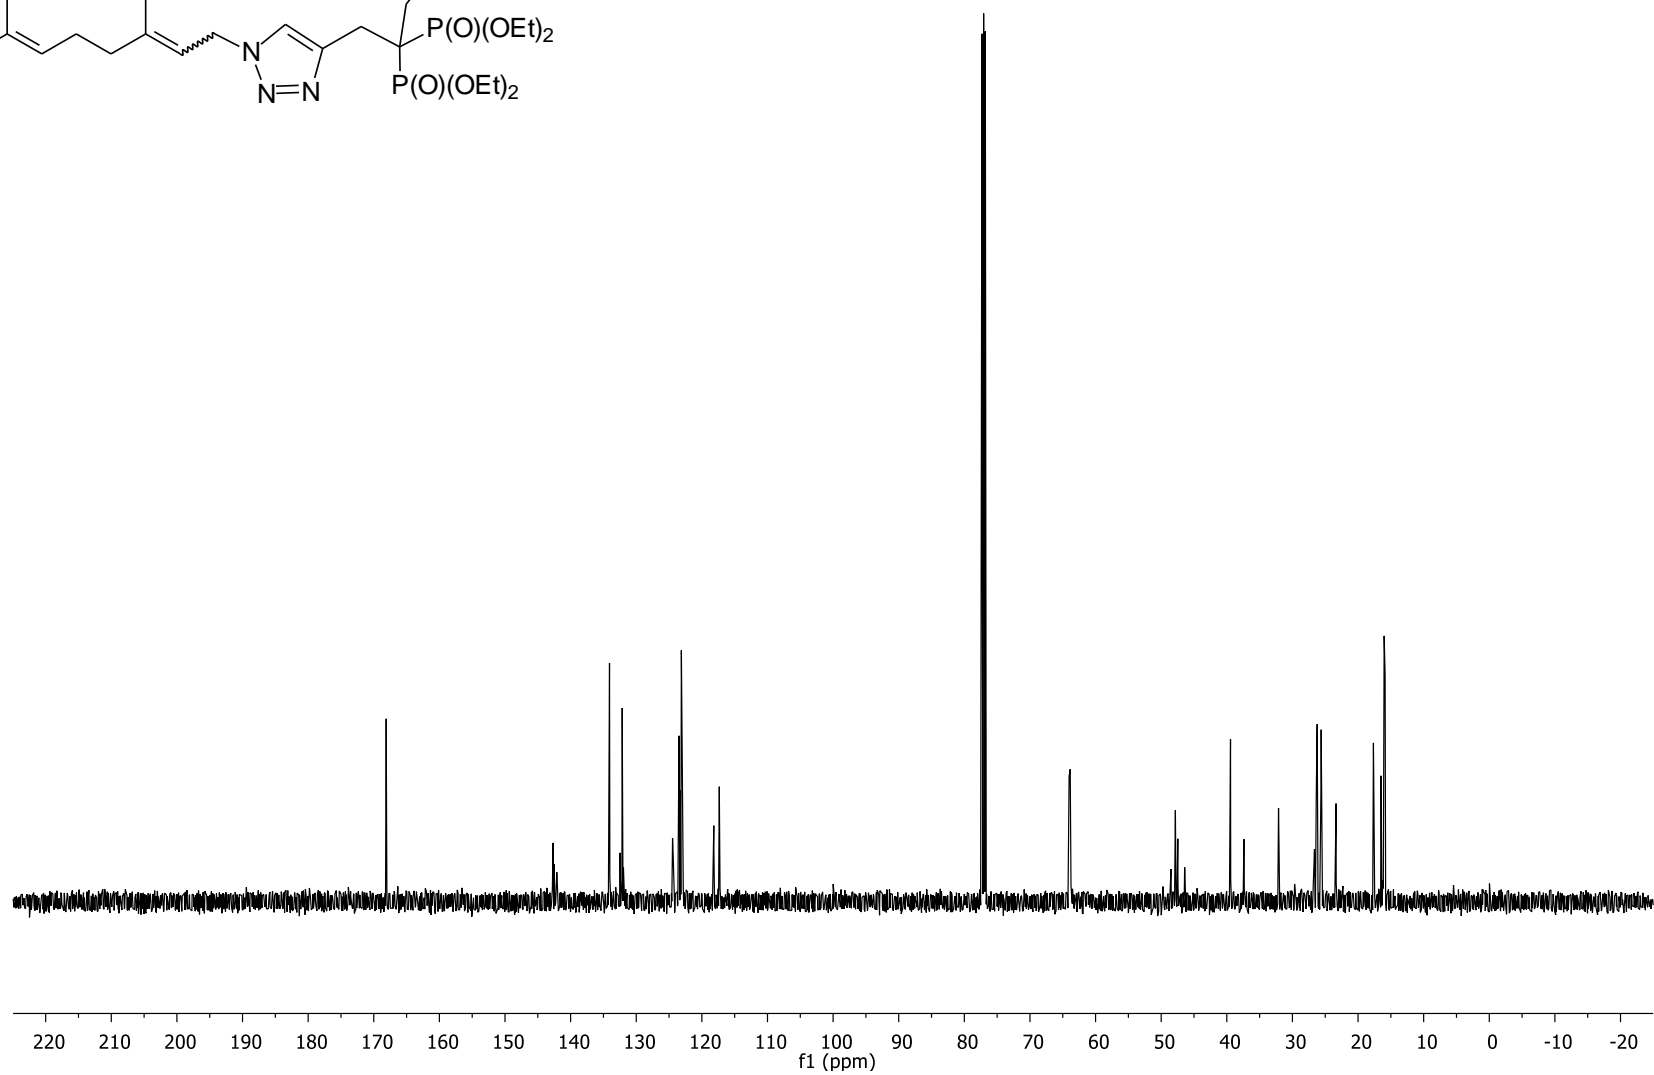

<sup>13</sup>C NMR Spectrum of Compound 9 (CDCl<sub>3</sub>, 126 MHz)



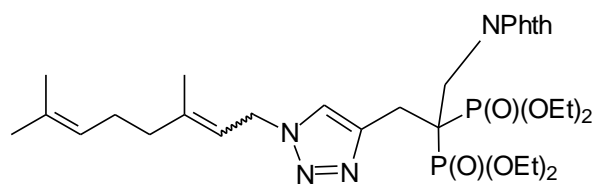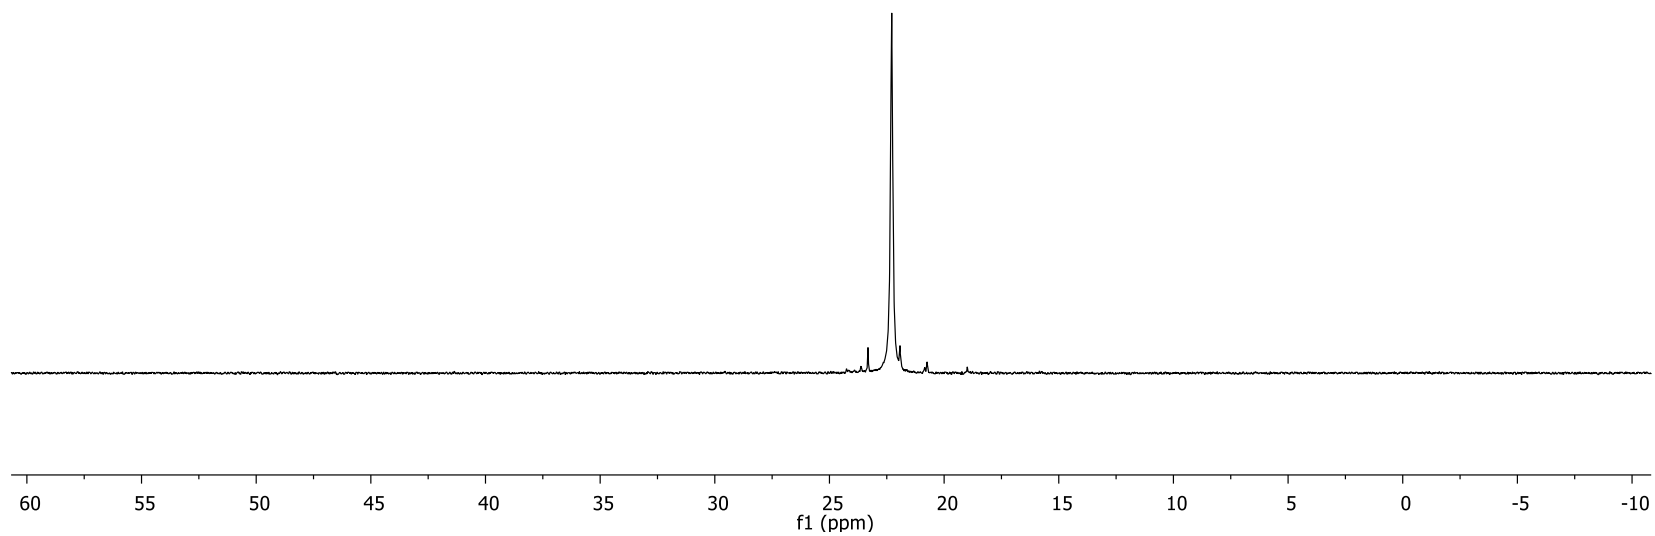

<sup>31</sup>P NMR Spectrum of Compound 9 (CDCl<sub>3</sub>, 202 MHz)

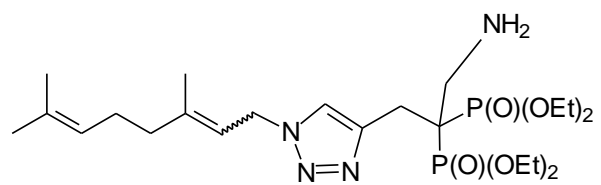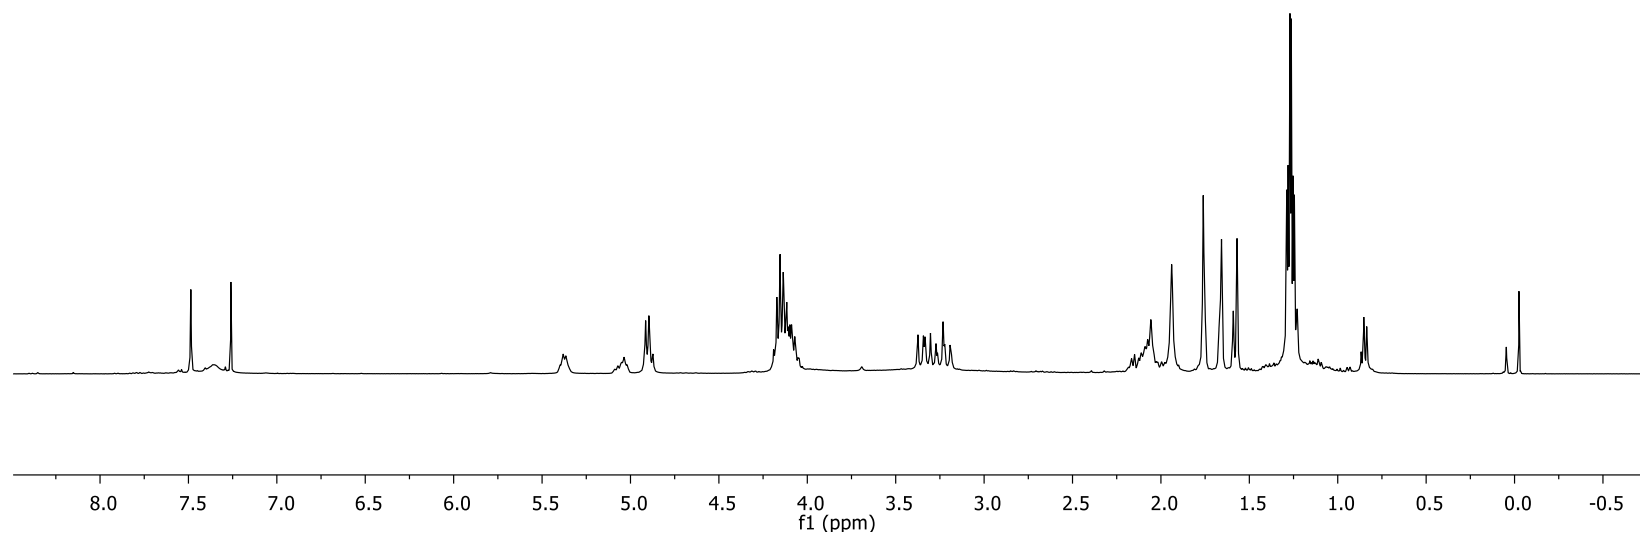

<sup>1</sup>H NMR Spectrum of Compound **16** (CDCl<sub>3</sub>, 400 MHz)

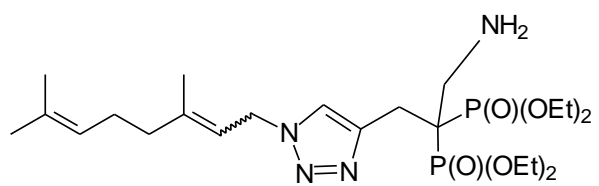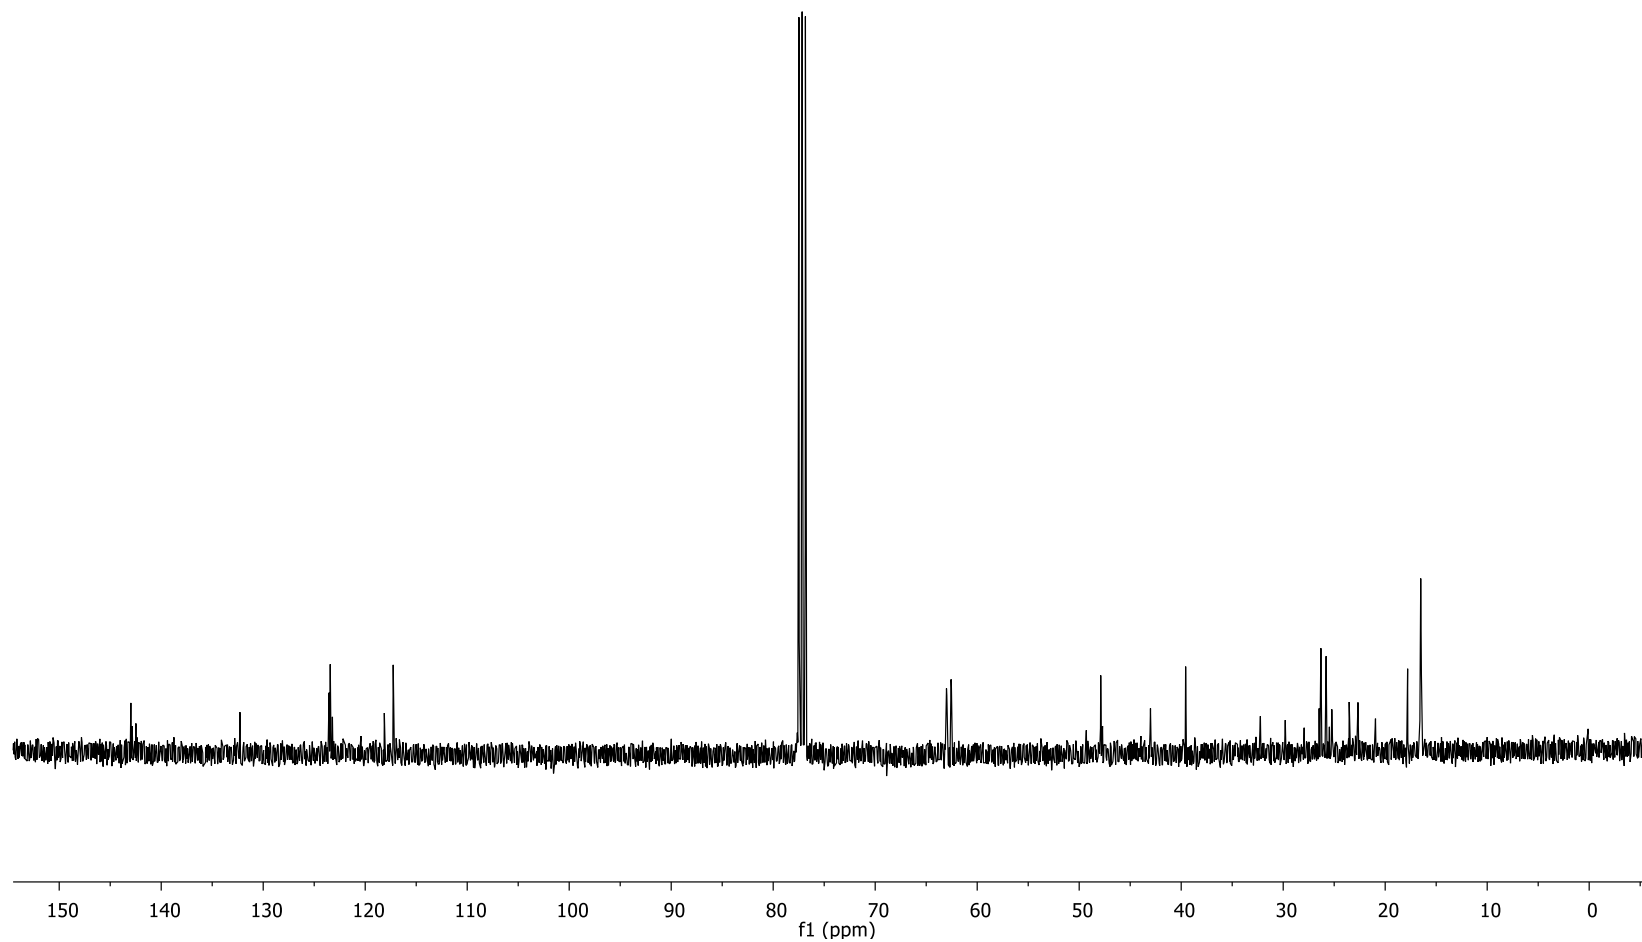

<sup>13</sup>C NMR Spectrum of Compound **16** (CDCl<sub>3</sub>, 100 MHz)

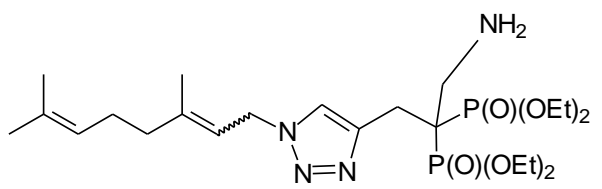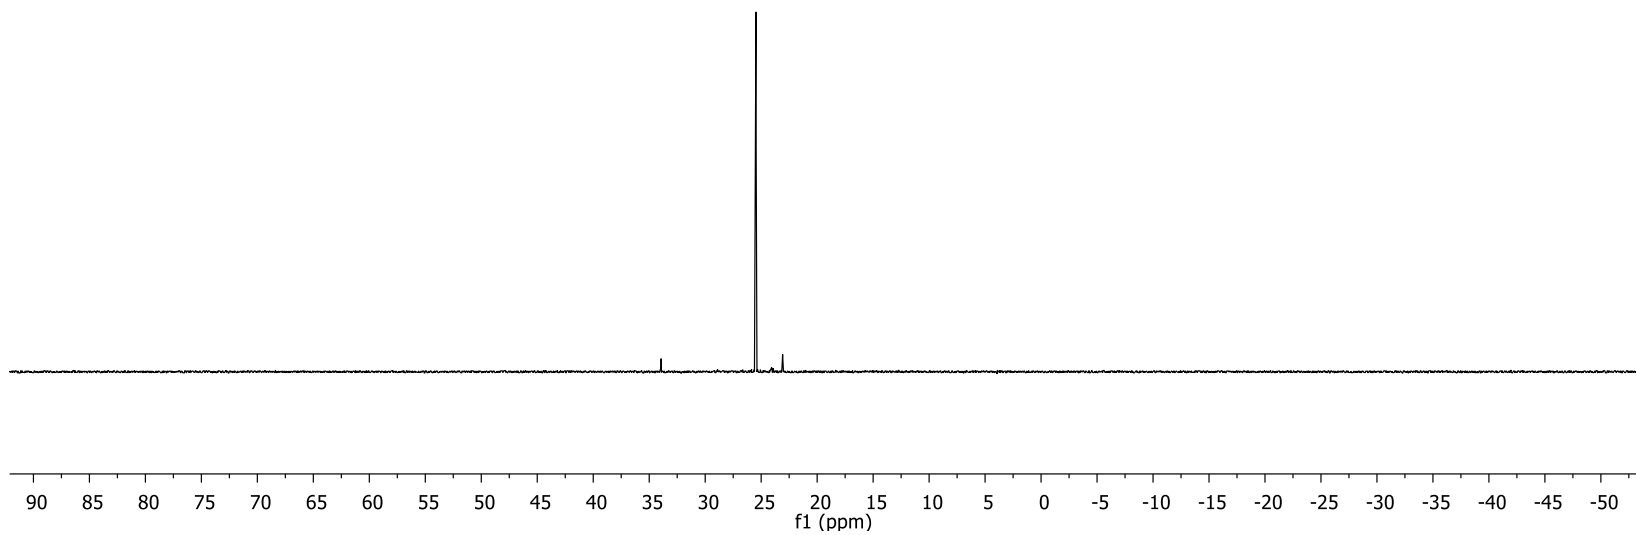

$^{31}\text{P}$  NMR Spectrum of Compound **16** ( $\text{CDCl}_3$ , 162 MHz)

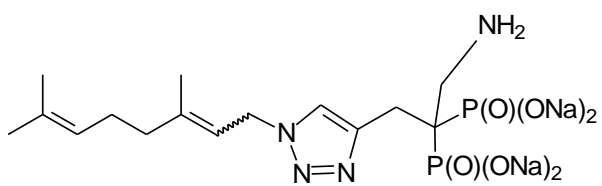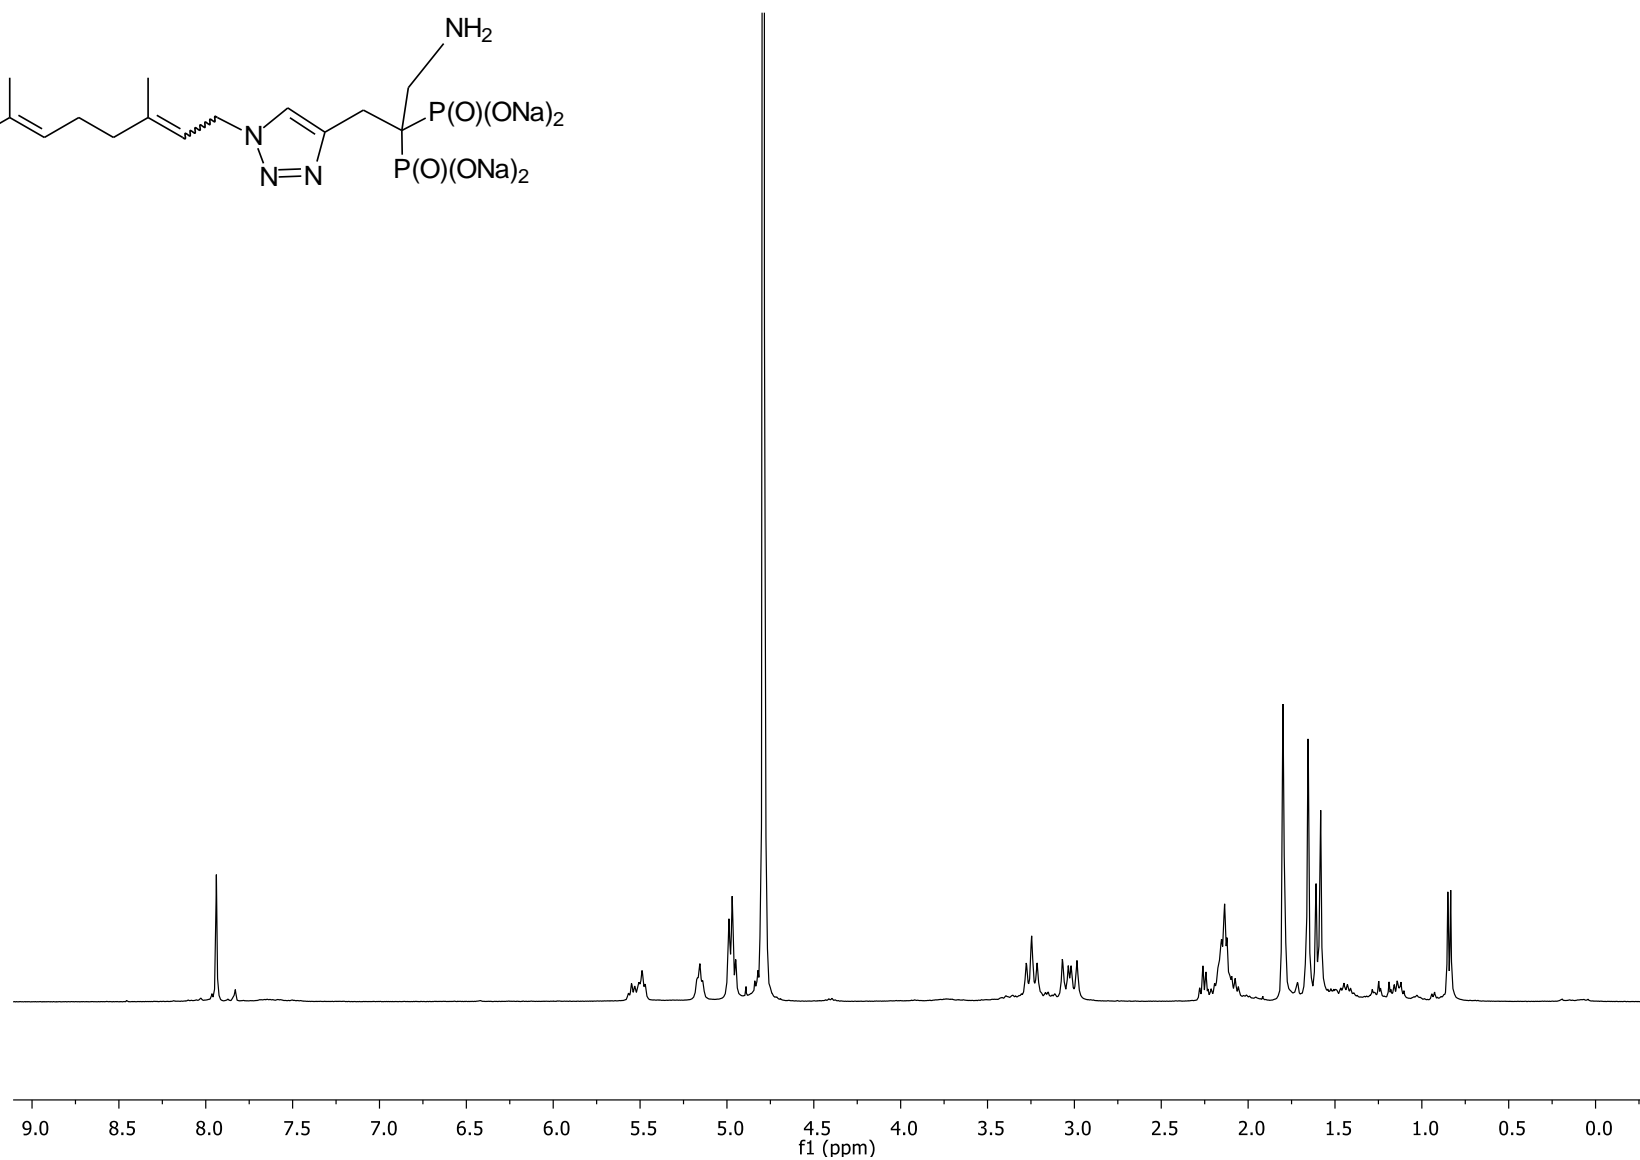

$^1\text{H}$  NMR Spectrum of Compound 17 ( $\text{D}_2\text{O}$ , 400 MHz)

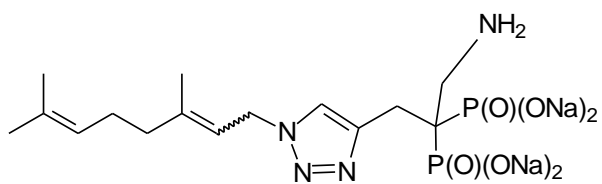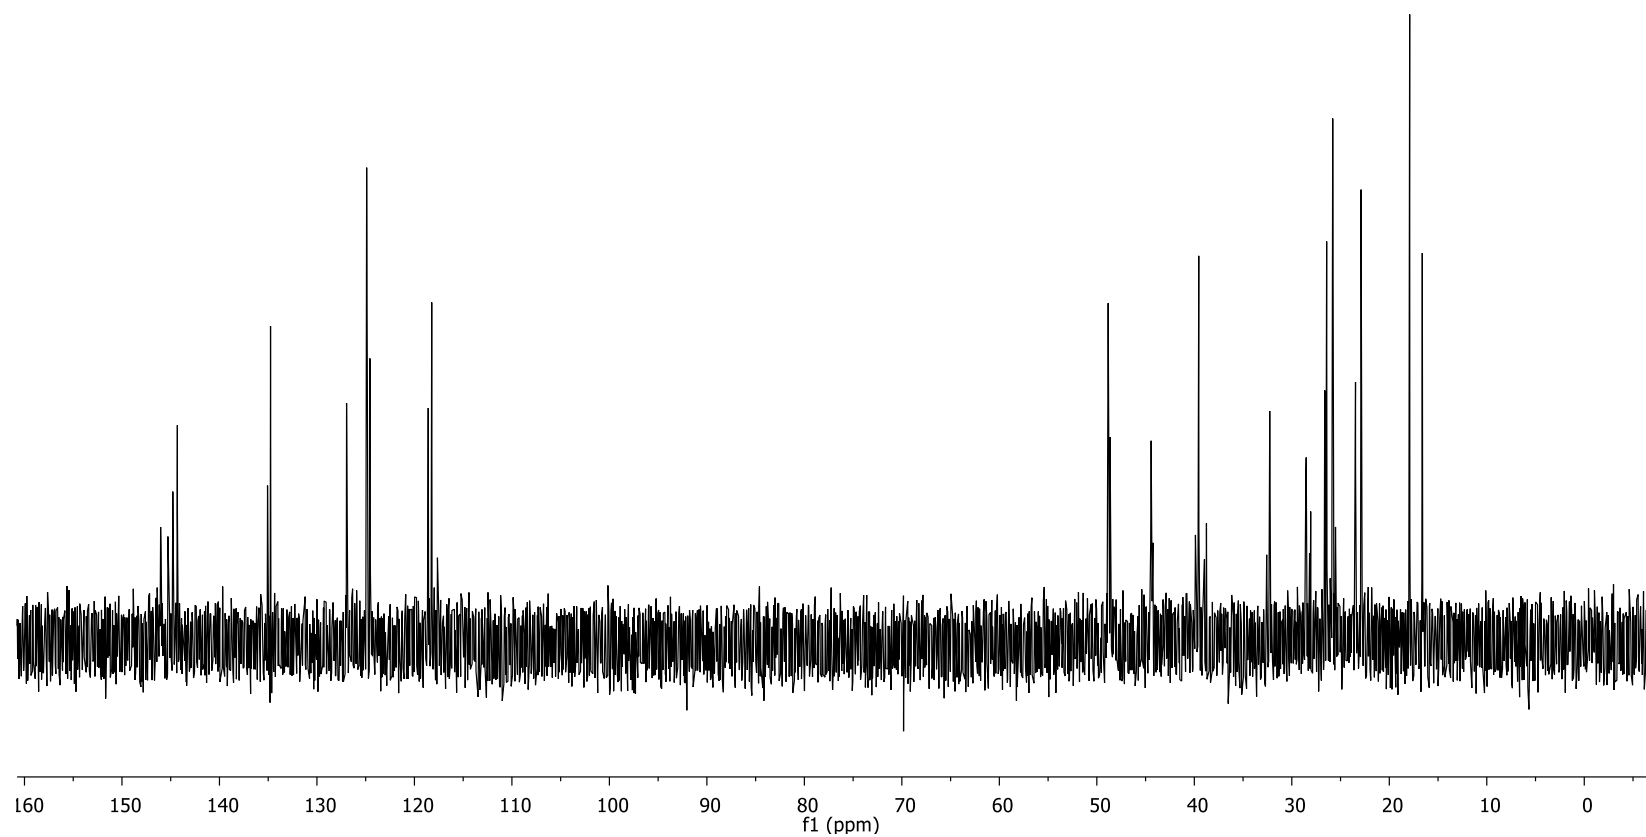

$^{13}\text{C}$  NMR Spectrum of Compound 17 ( $\text{D}_2\text{O}$ , 100 MHz)

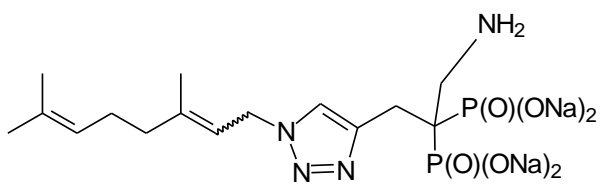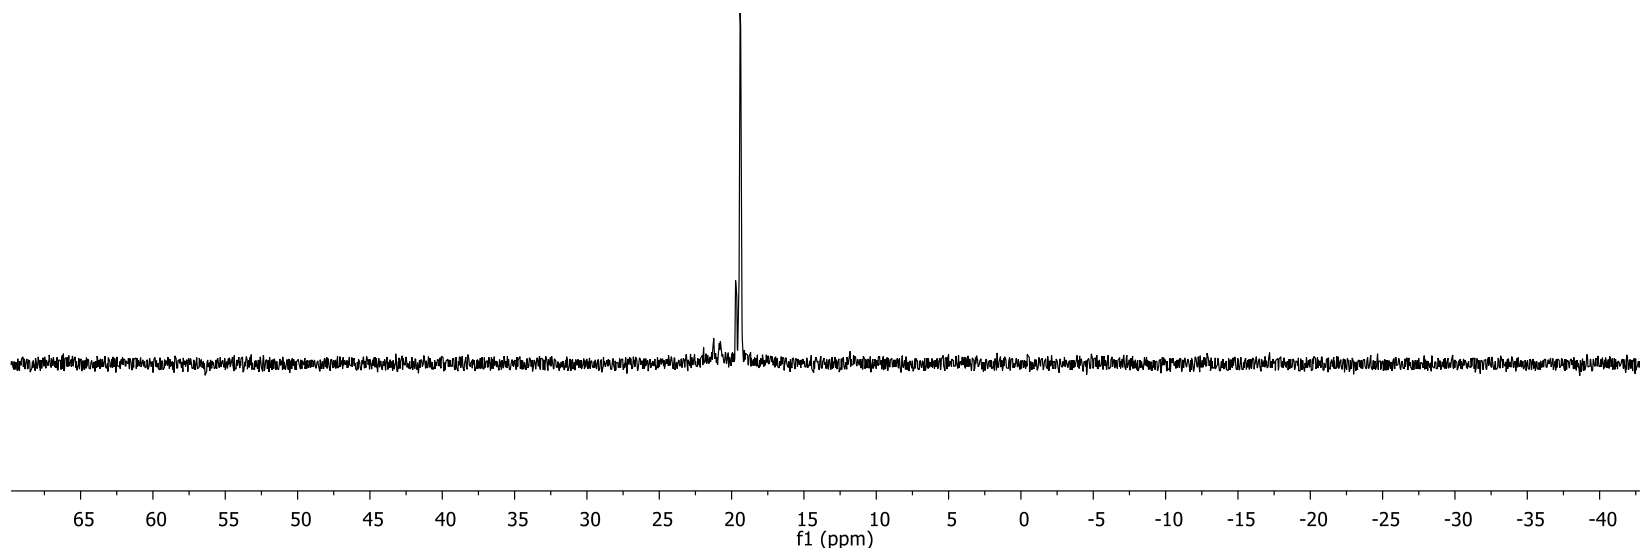

$^{31}\text{P}$  NMR Spectrum of Compound 17 ( $\text{D}_2\text{O}$ , 162 MHz)

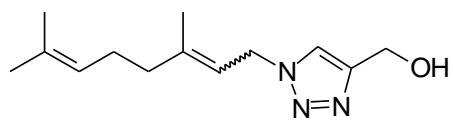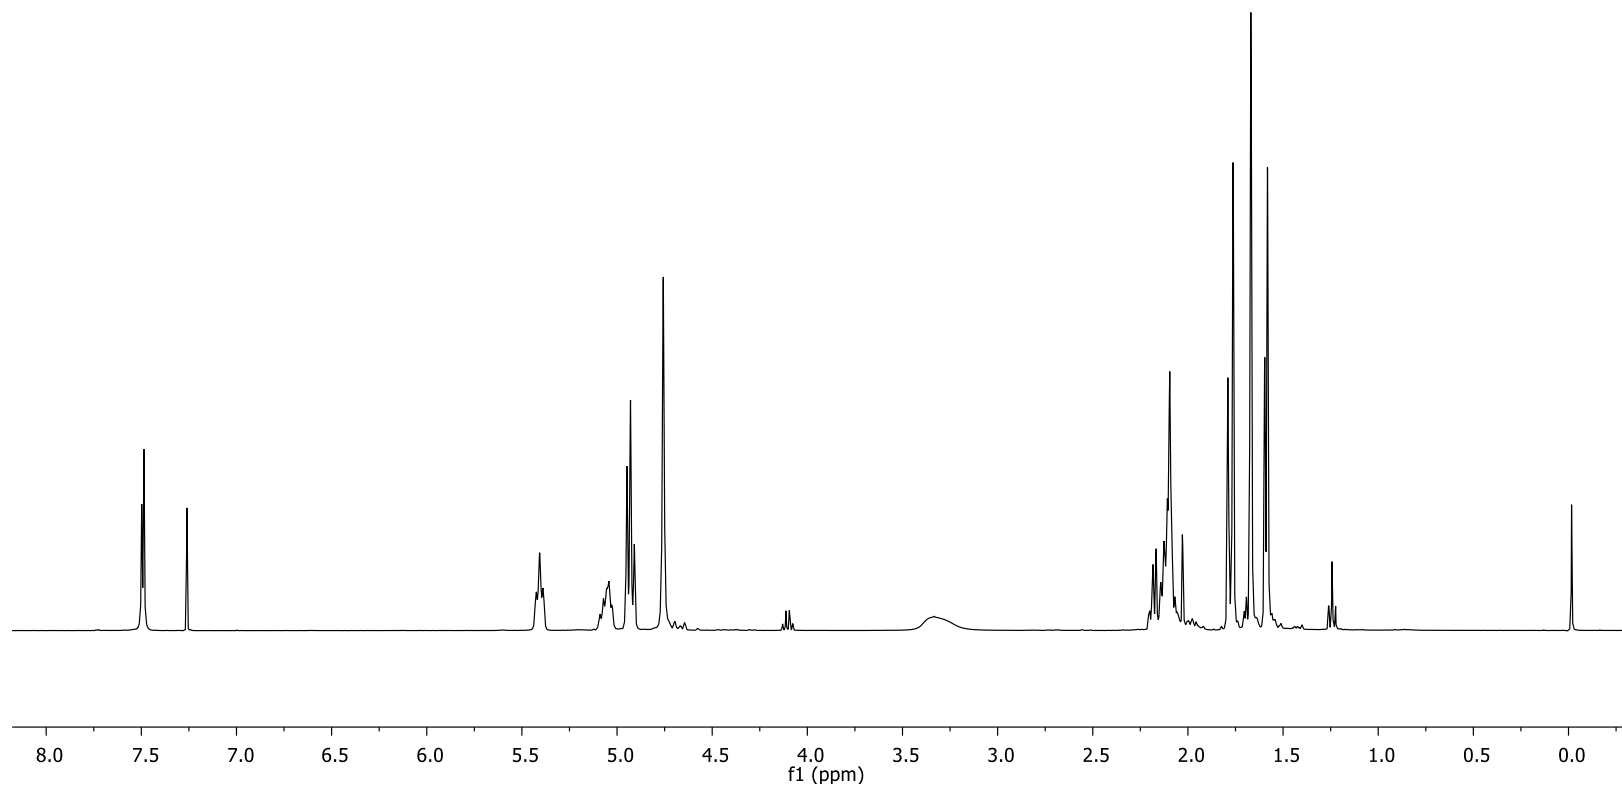

<sup>1</sup>H NMR Spectrum of Compound **19** (CDCl<sub>3</sub>, 400 MHz)



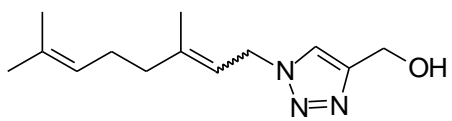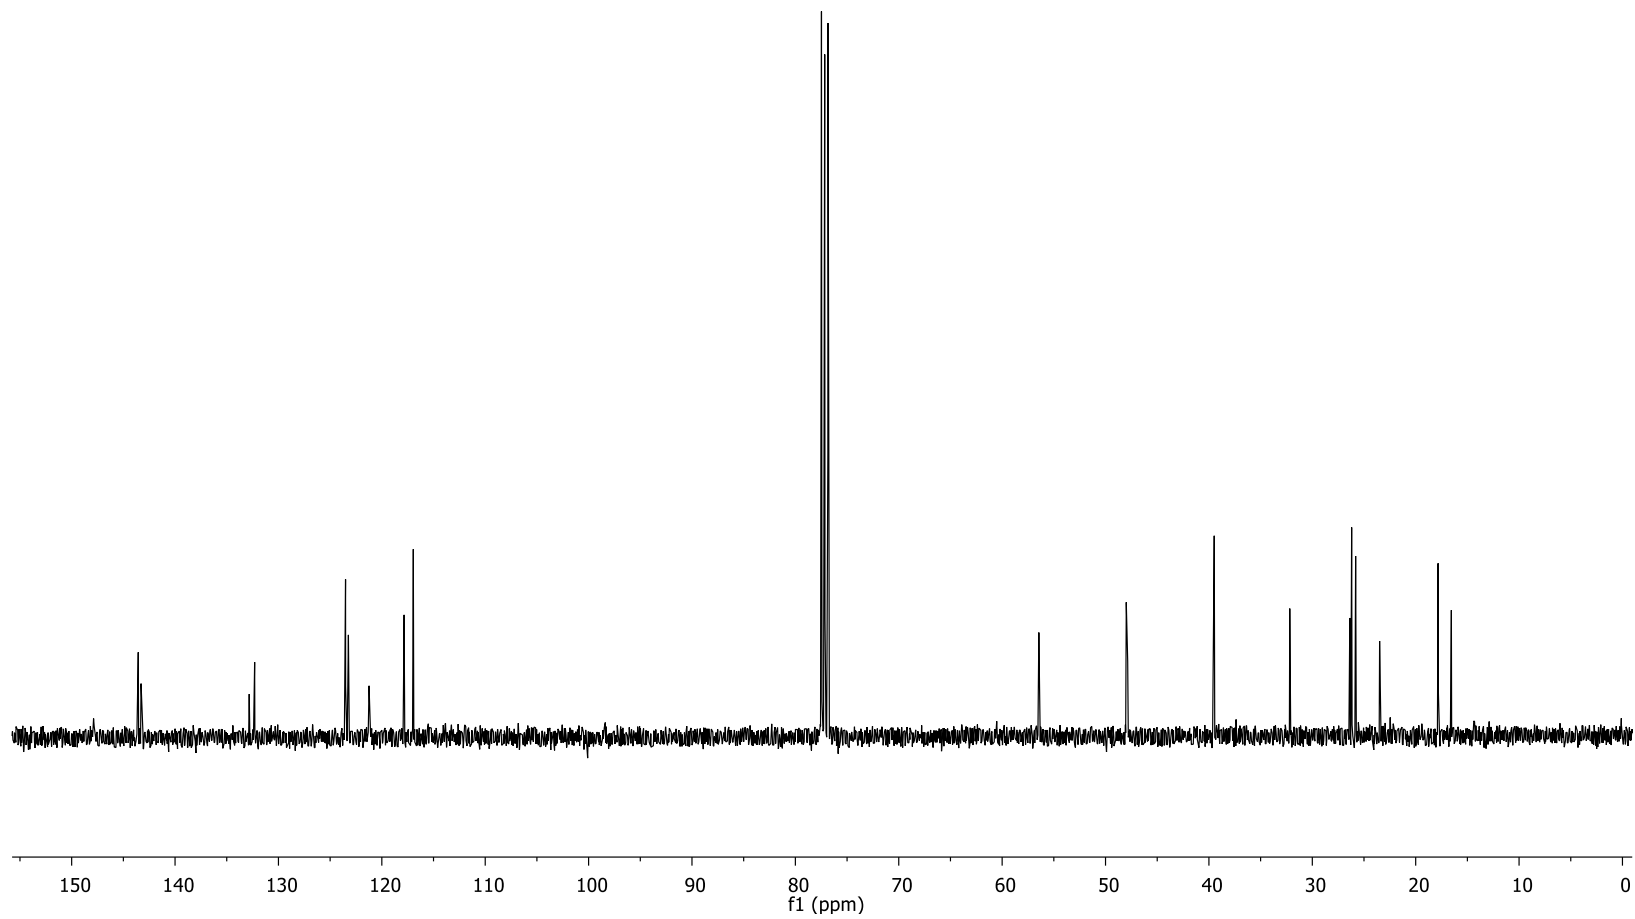

$^{13}\text{C}$  NMR Spectrum of Compound 19 ( $\text{CDCl}_3$ , 100 MHz)

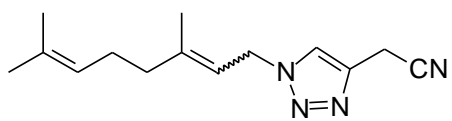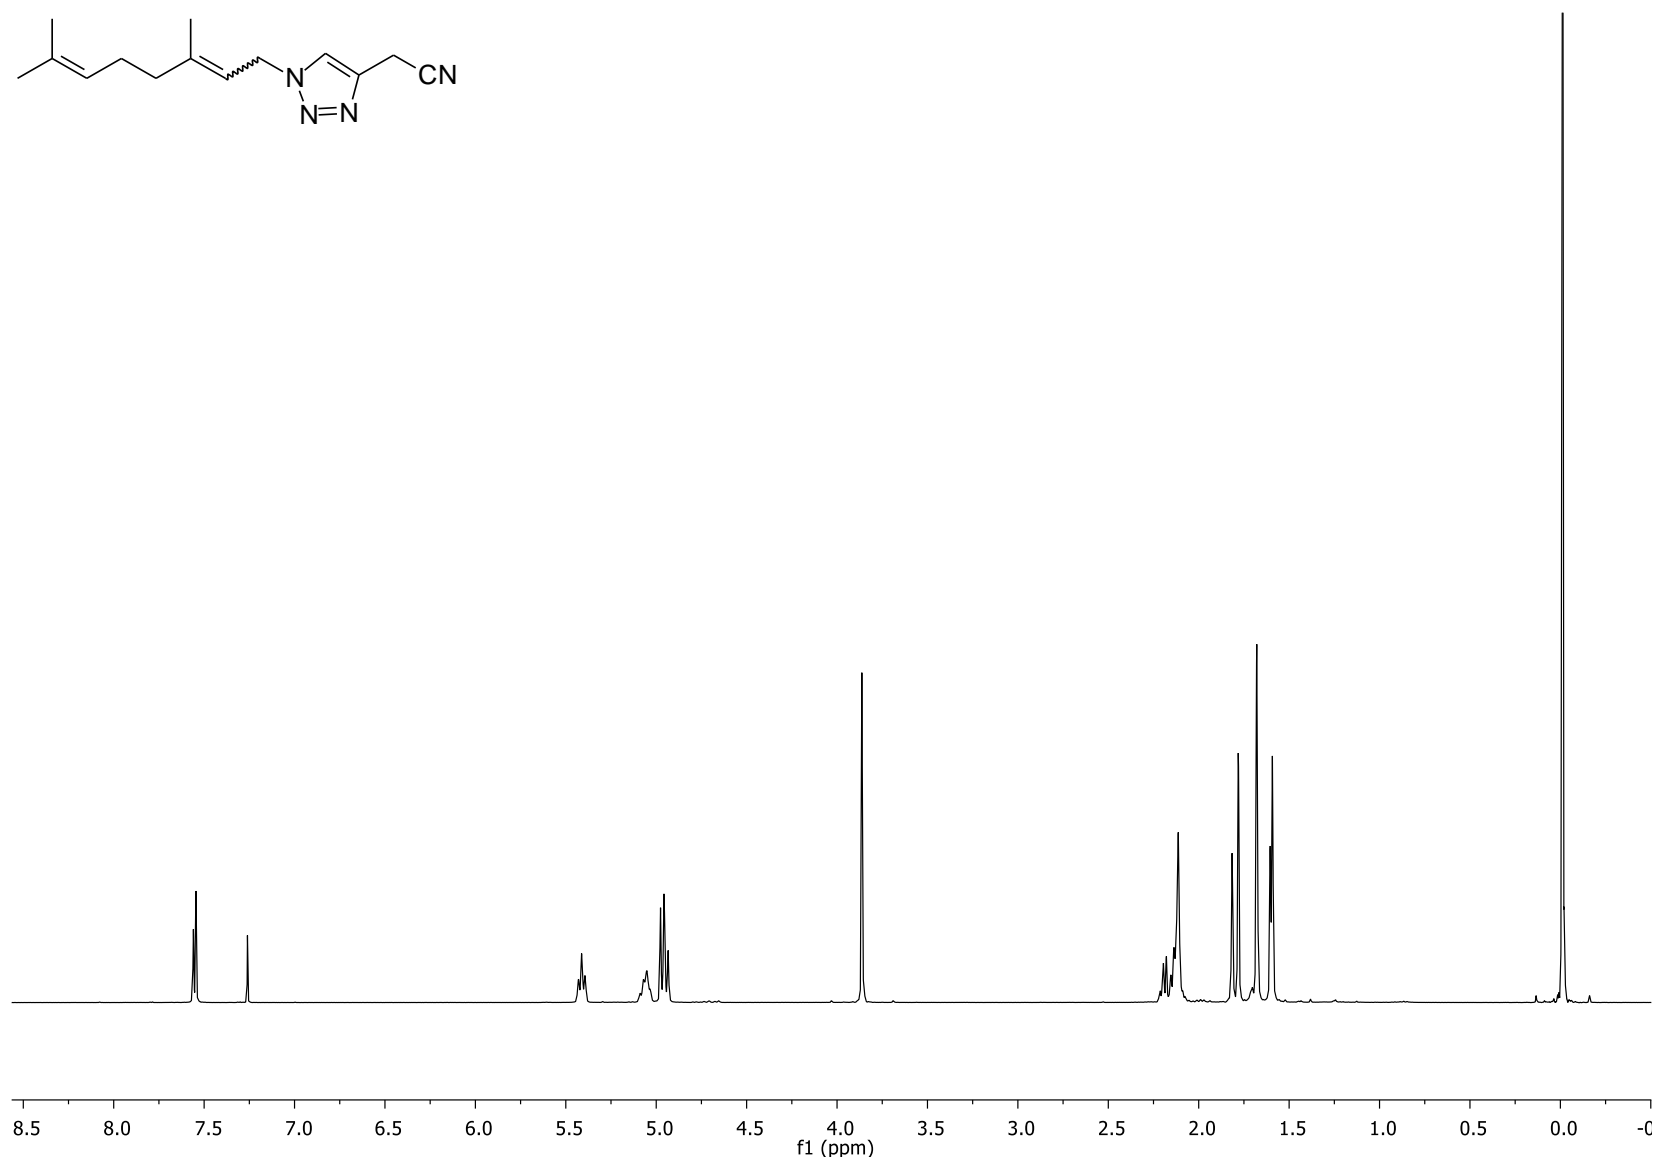

<sup>1</sup>H NMR Spectrum of Compound **20** (CDCl<sub>3</sub>, 400 MHz)

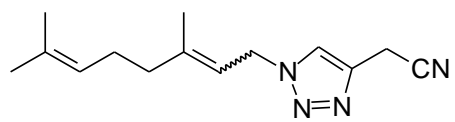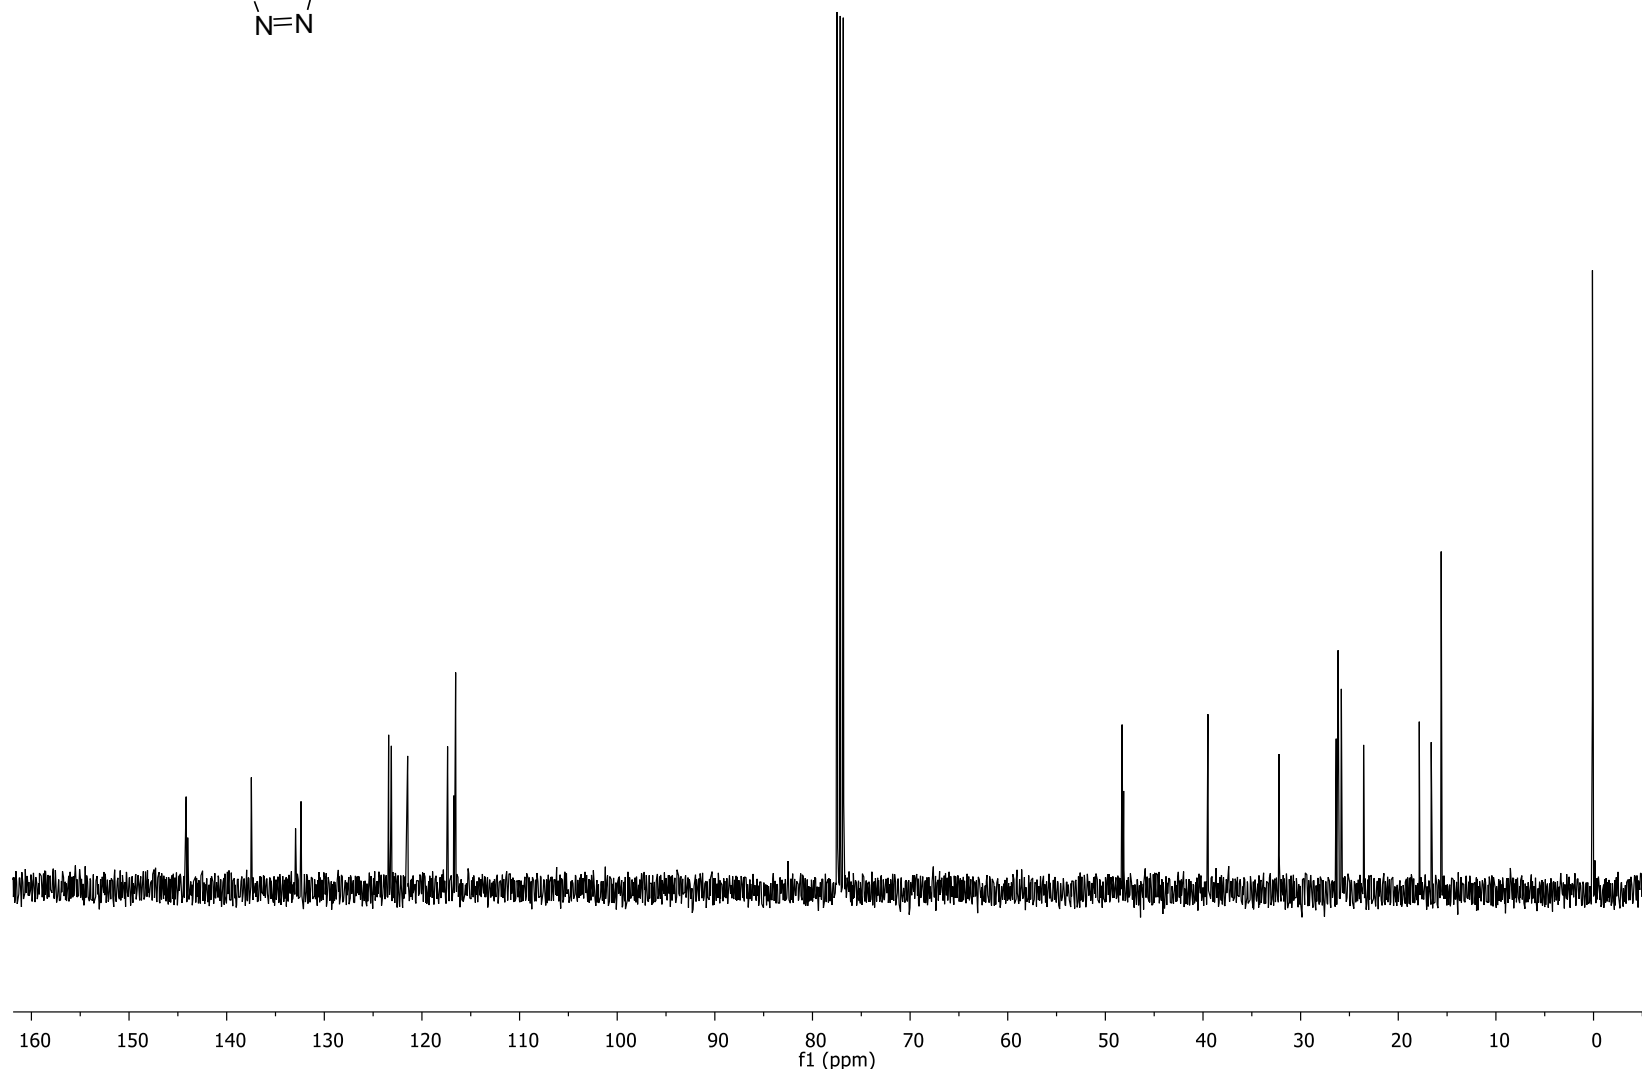

$^{13}\text{C}$  NMR Spectrum of Compound **20** ( $\text{CDCl}_3$ , 100 MHz)

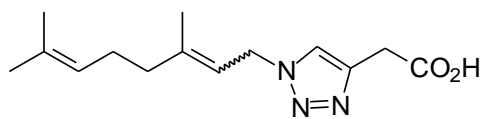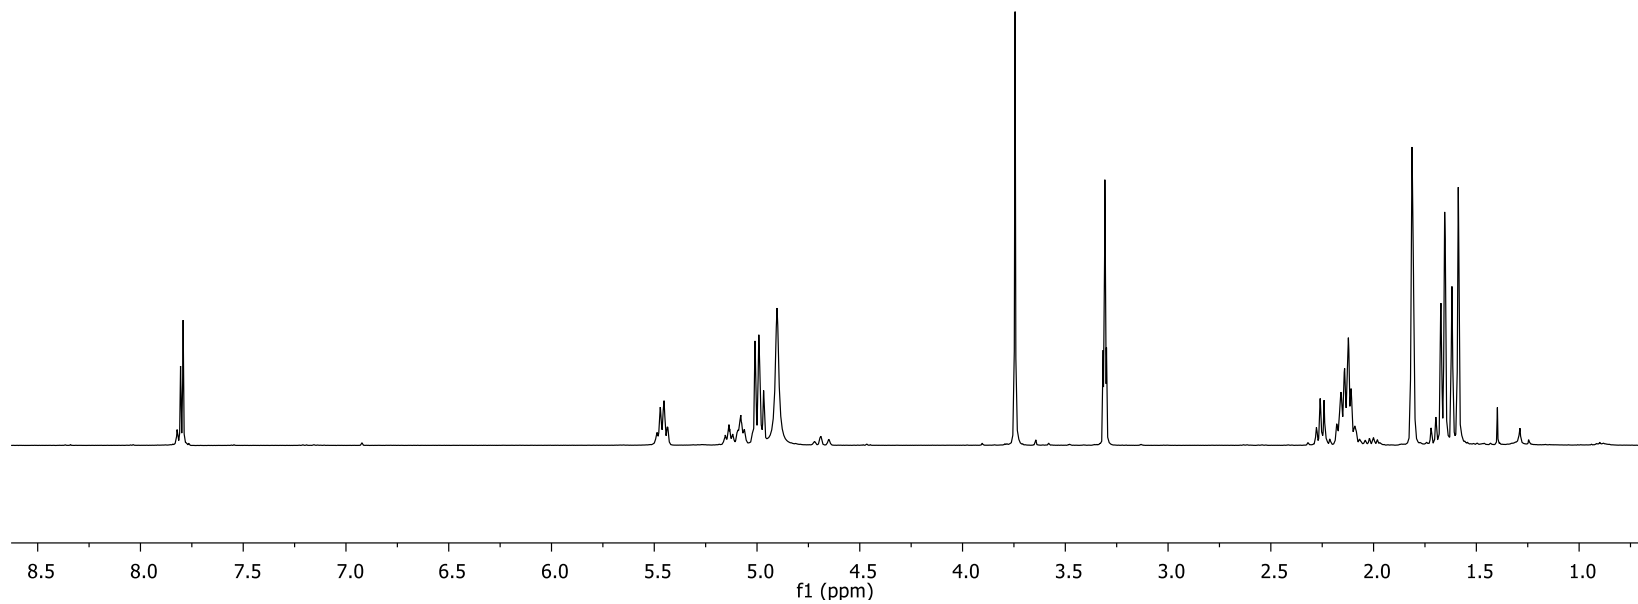

<sup>1</sup>H NMR Spectrum of Compound 21 (MeOD, 400 MHz)

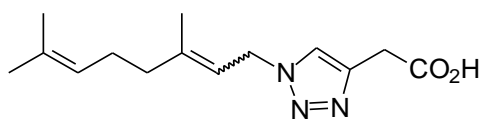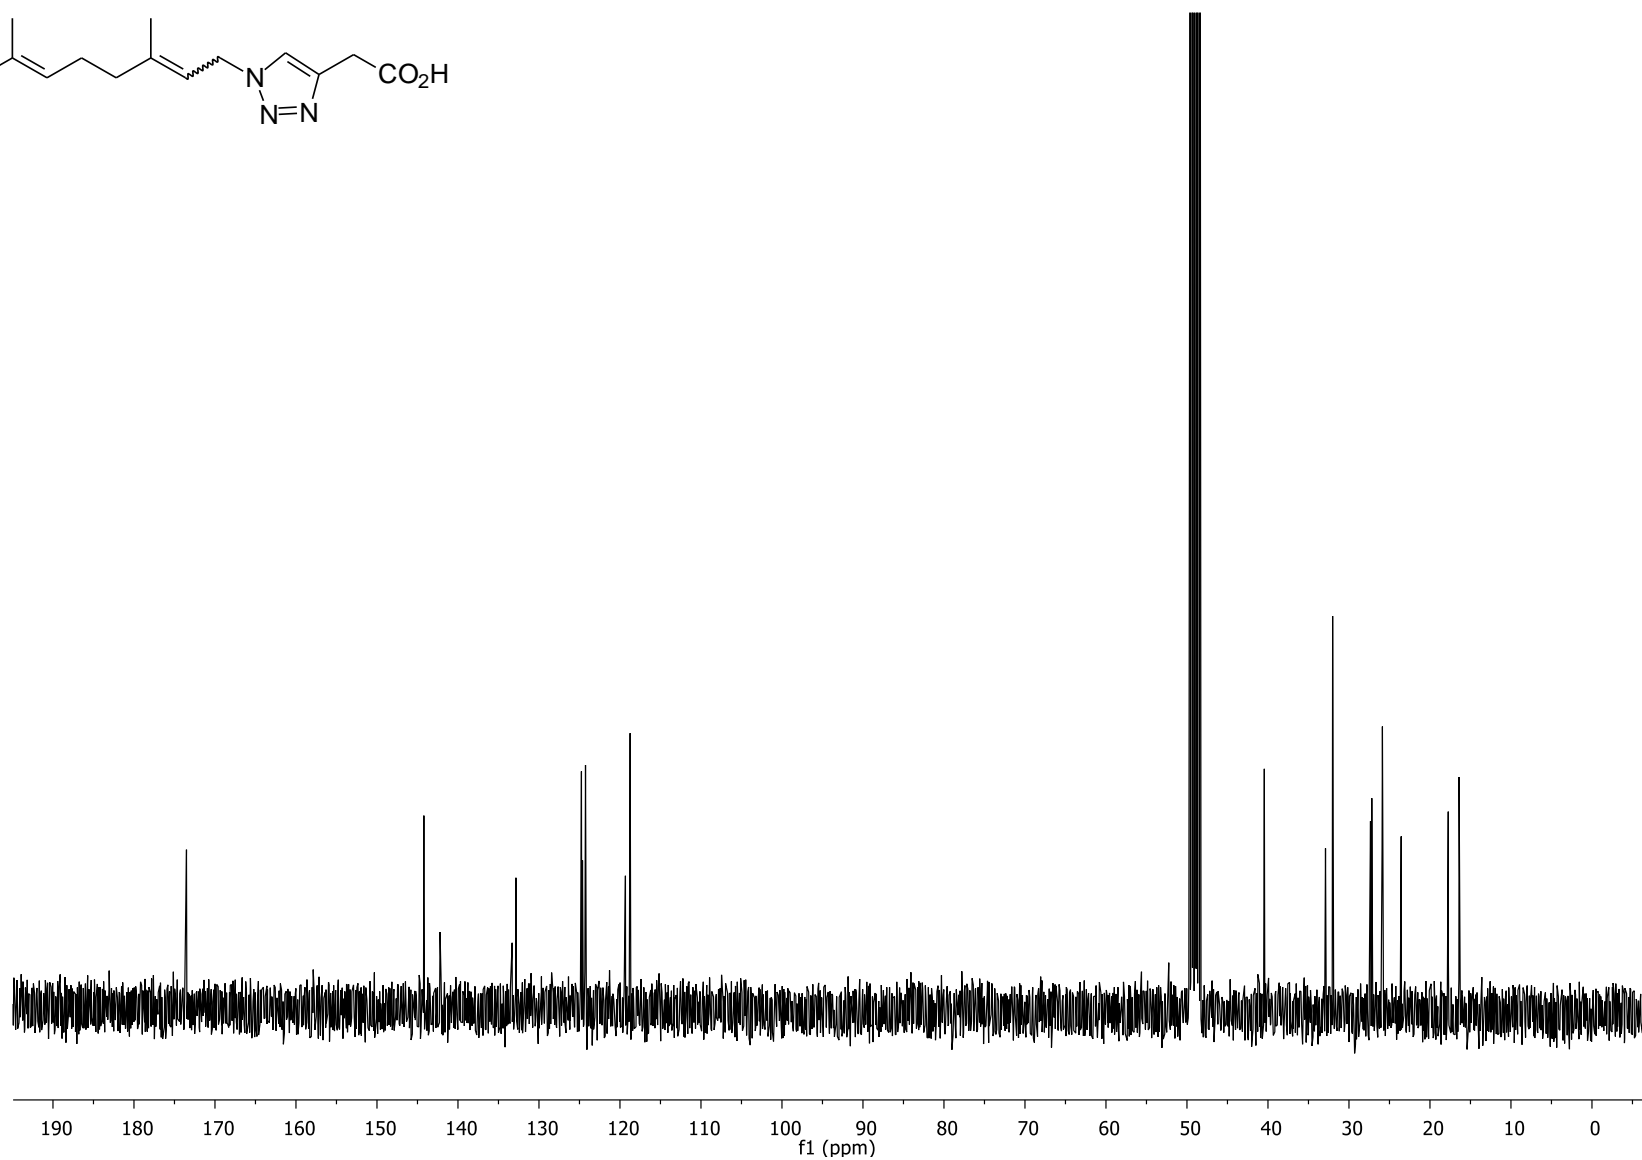

<sup>13</sup>C NMR Spectrum of Compound 21 (MeOD, 100 MHz)

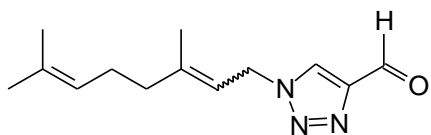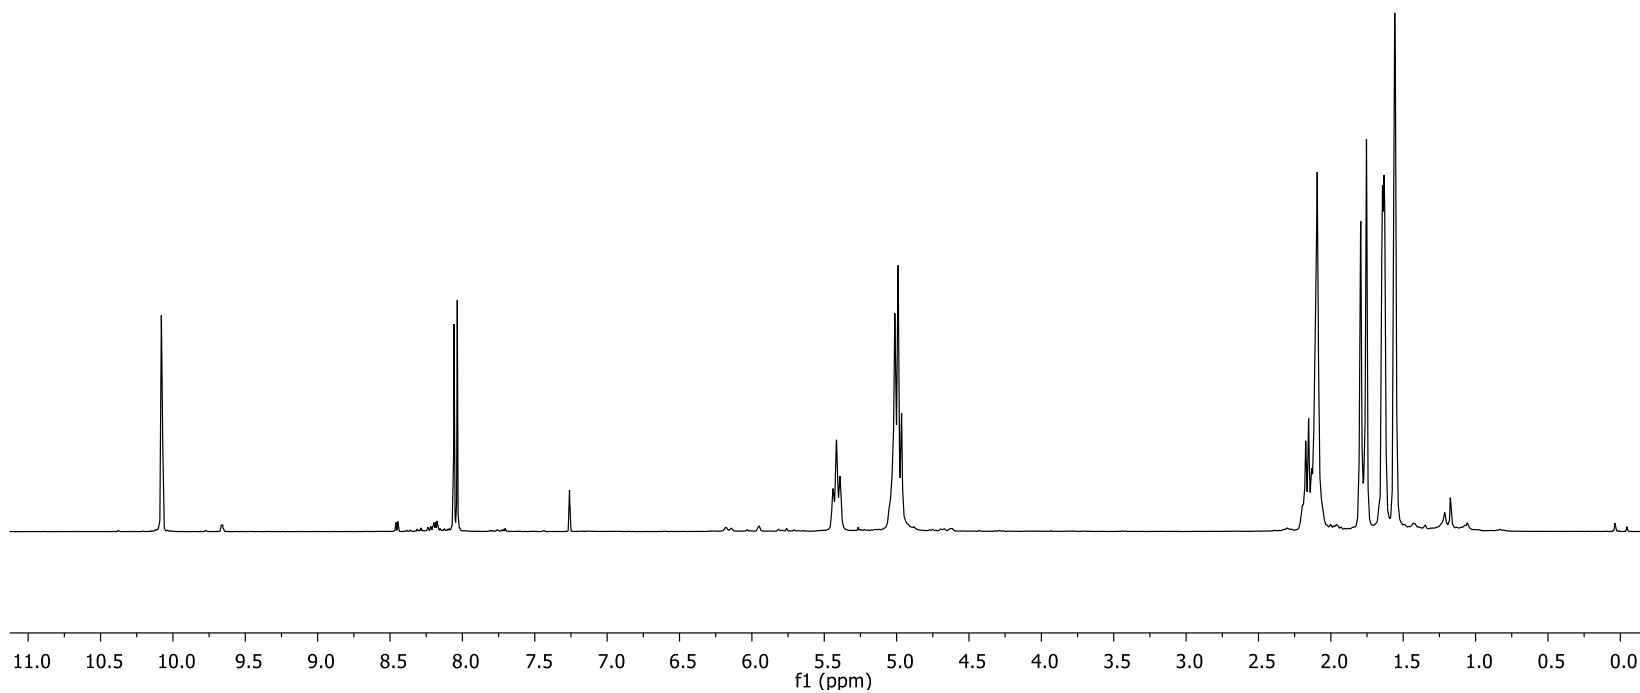

<sup>1</sup>H NMR Spectrum of Compound 22 (CDCl<sub>3</sub>, 400 MHz)

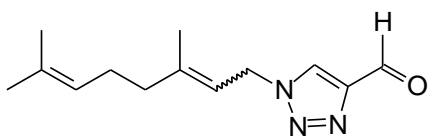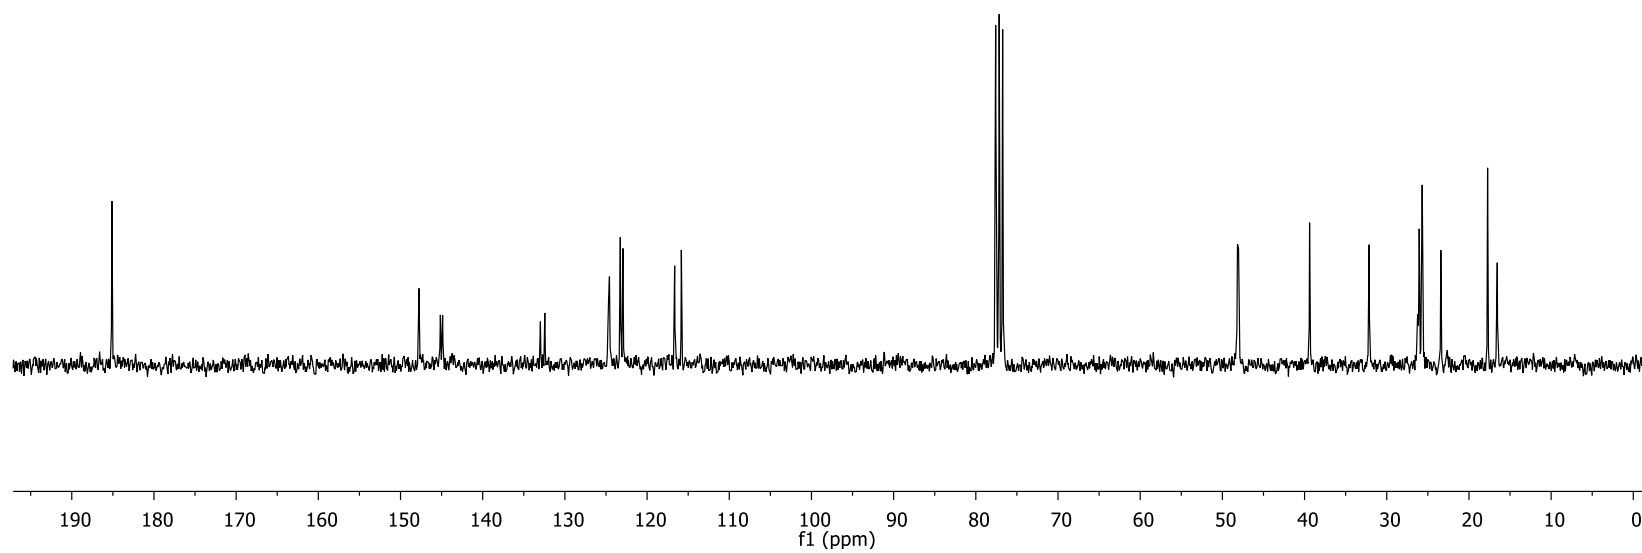

<sup>13</sup>C NMR Spectrum of Compound **22** (CDCl<sub>3</sub>, 75.5 MHz)

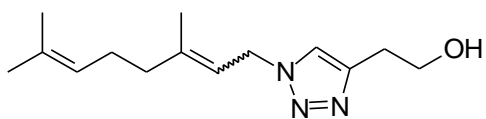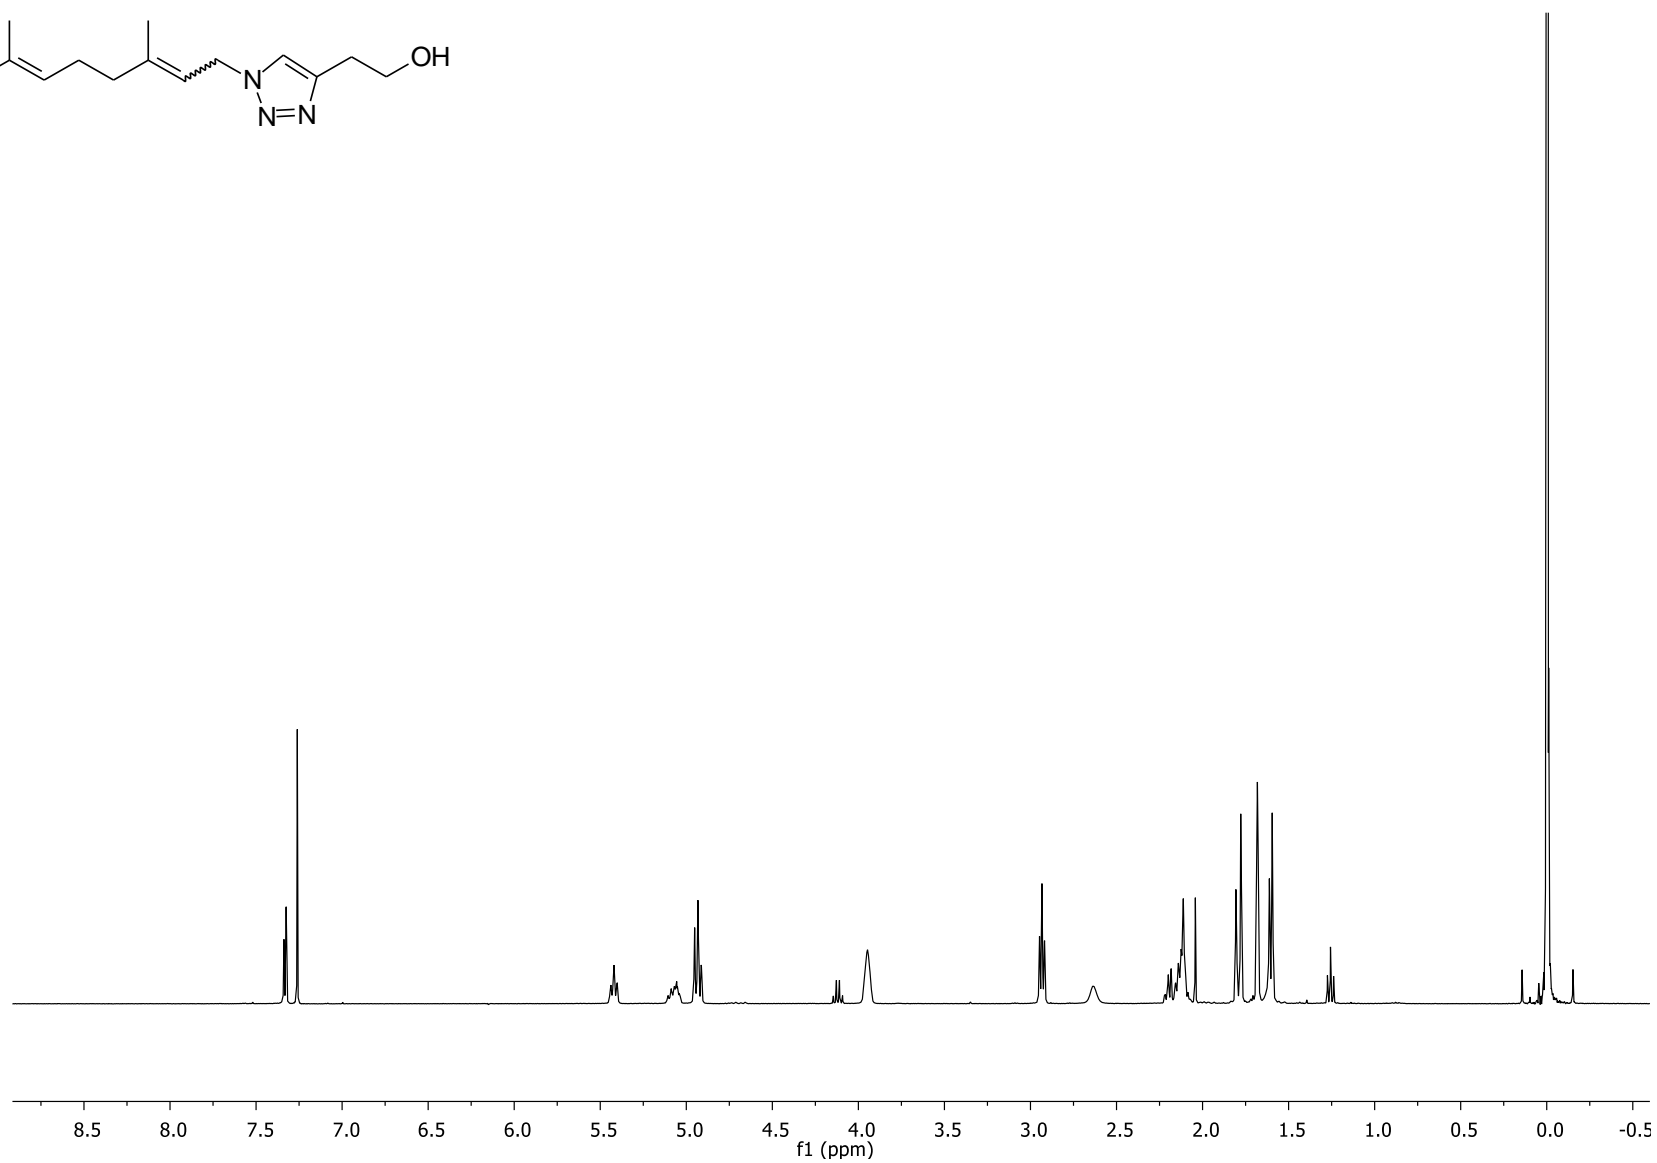

<sup>1</sup>H NMR Spectrum of Compound **24** (CDCl<sub>3</sub>, 400 MHz)



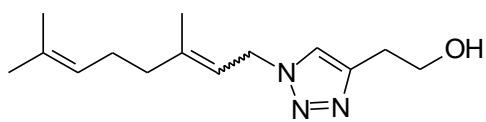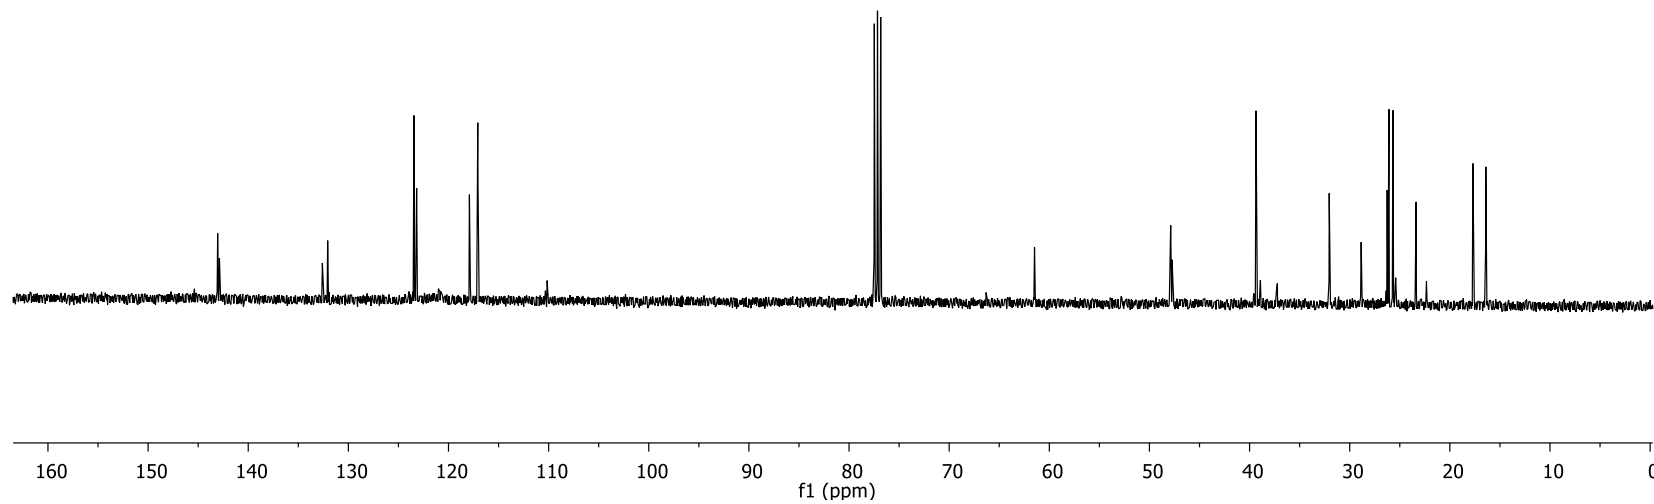

<sup>13</sup>C NMR Spectrum of Compound **24** (CDCl<sub>3</sub>, 100 MHz)

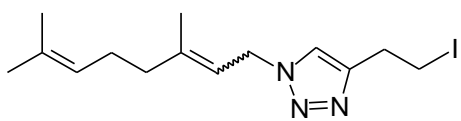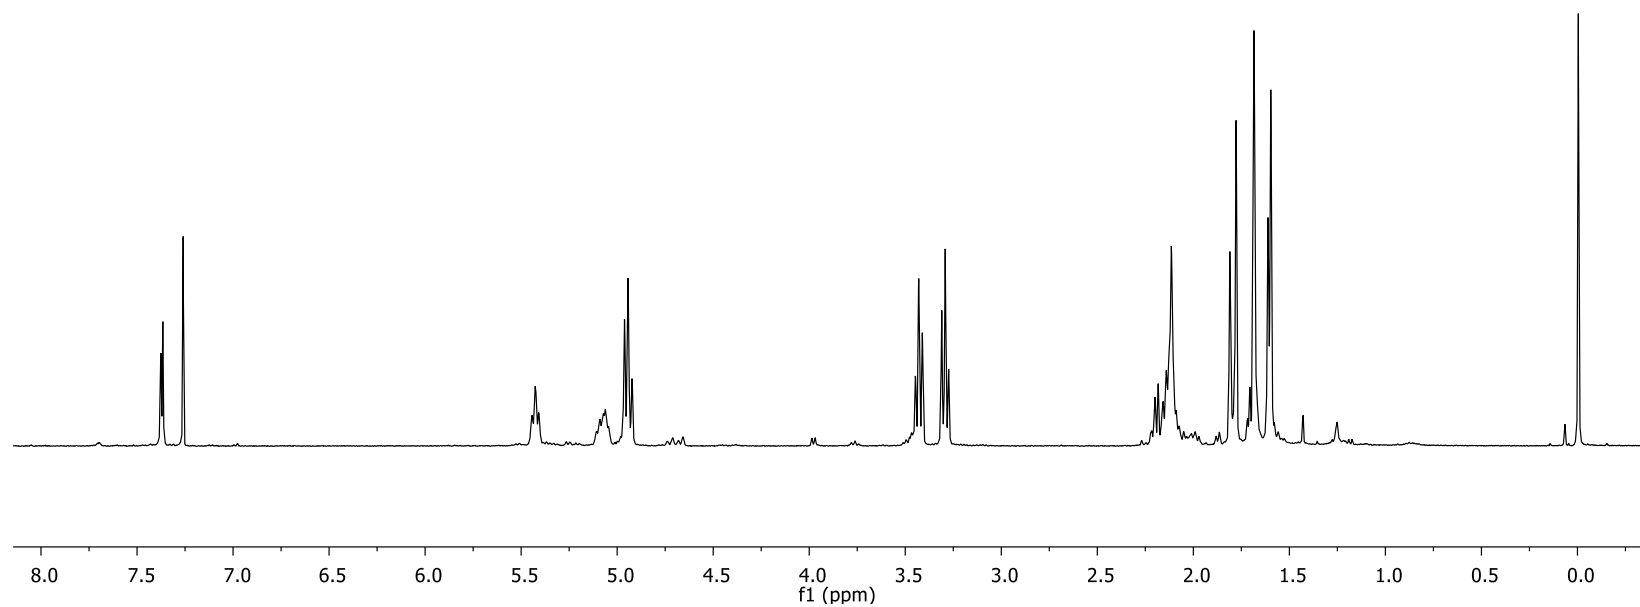

<sup>1</sup>H NMR Spectrum of Compound **25** (CDCl<sub>3</sub>, 400 MHz)

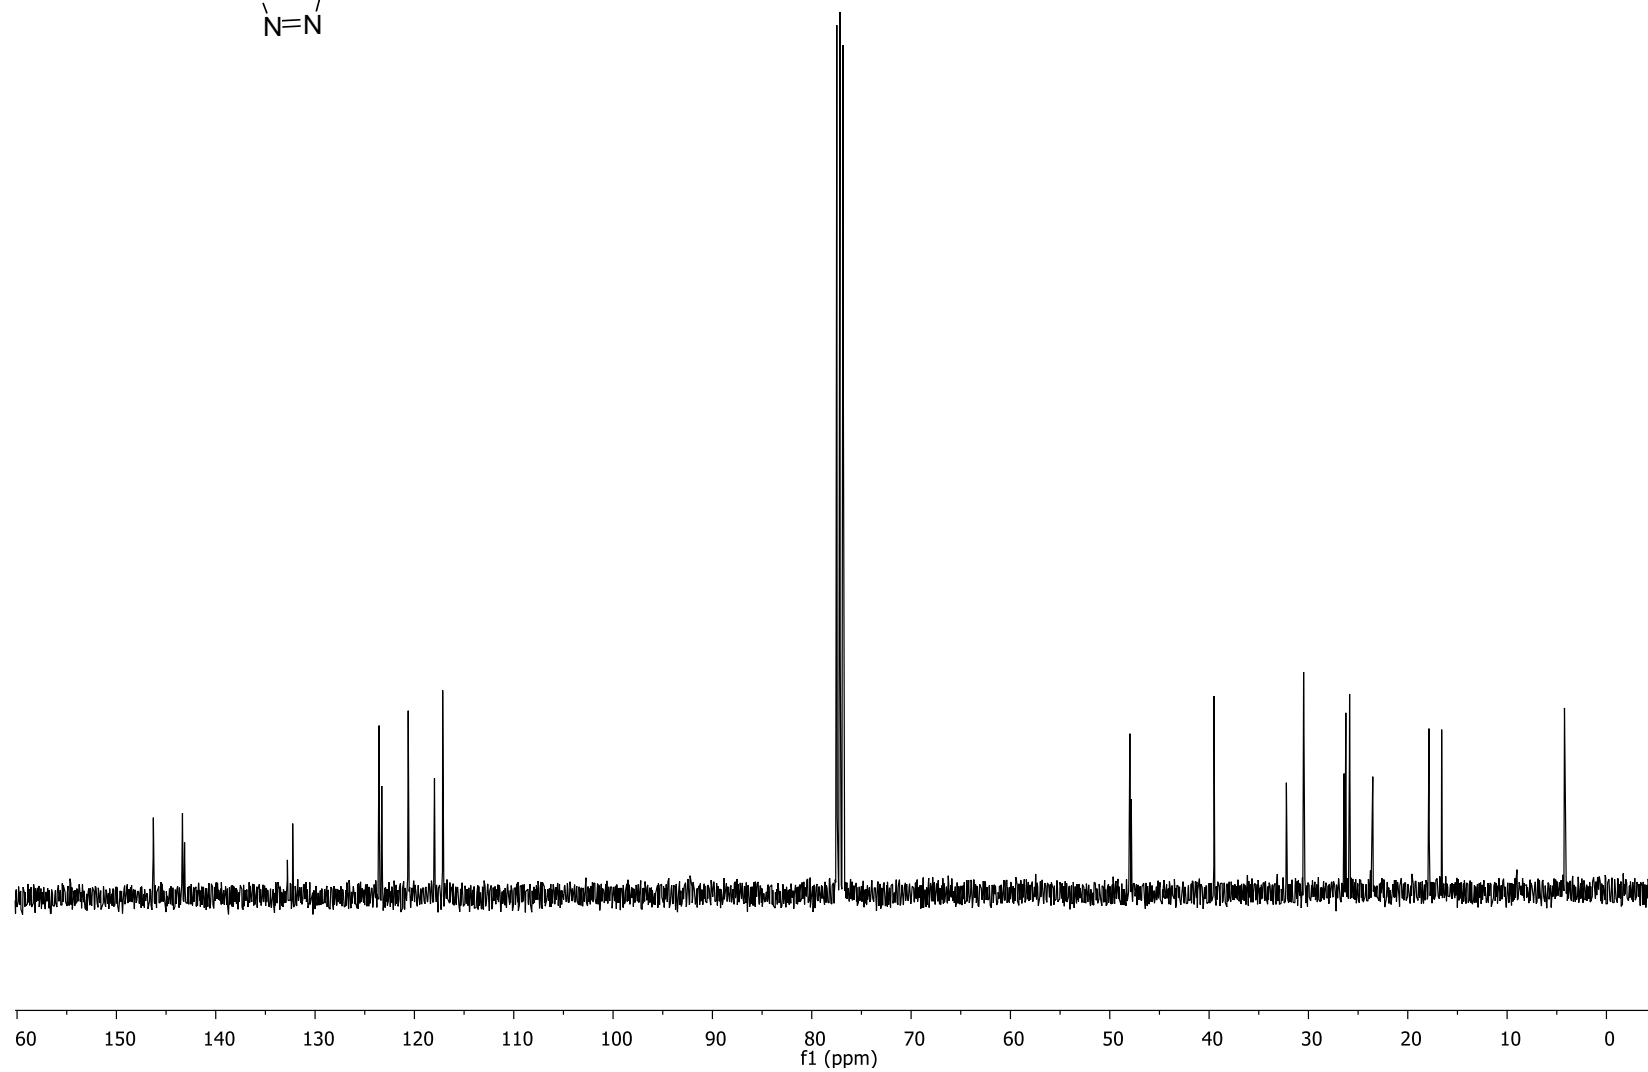

$^{13}\text{C}$  NMR Spectrum of Compound **25** ( $\text{CDCl}_3$ , 100 MHz)

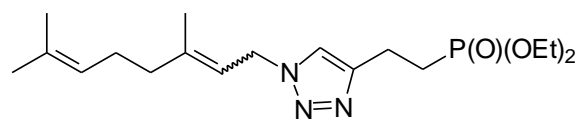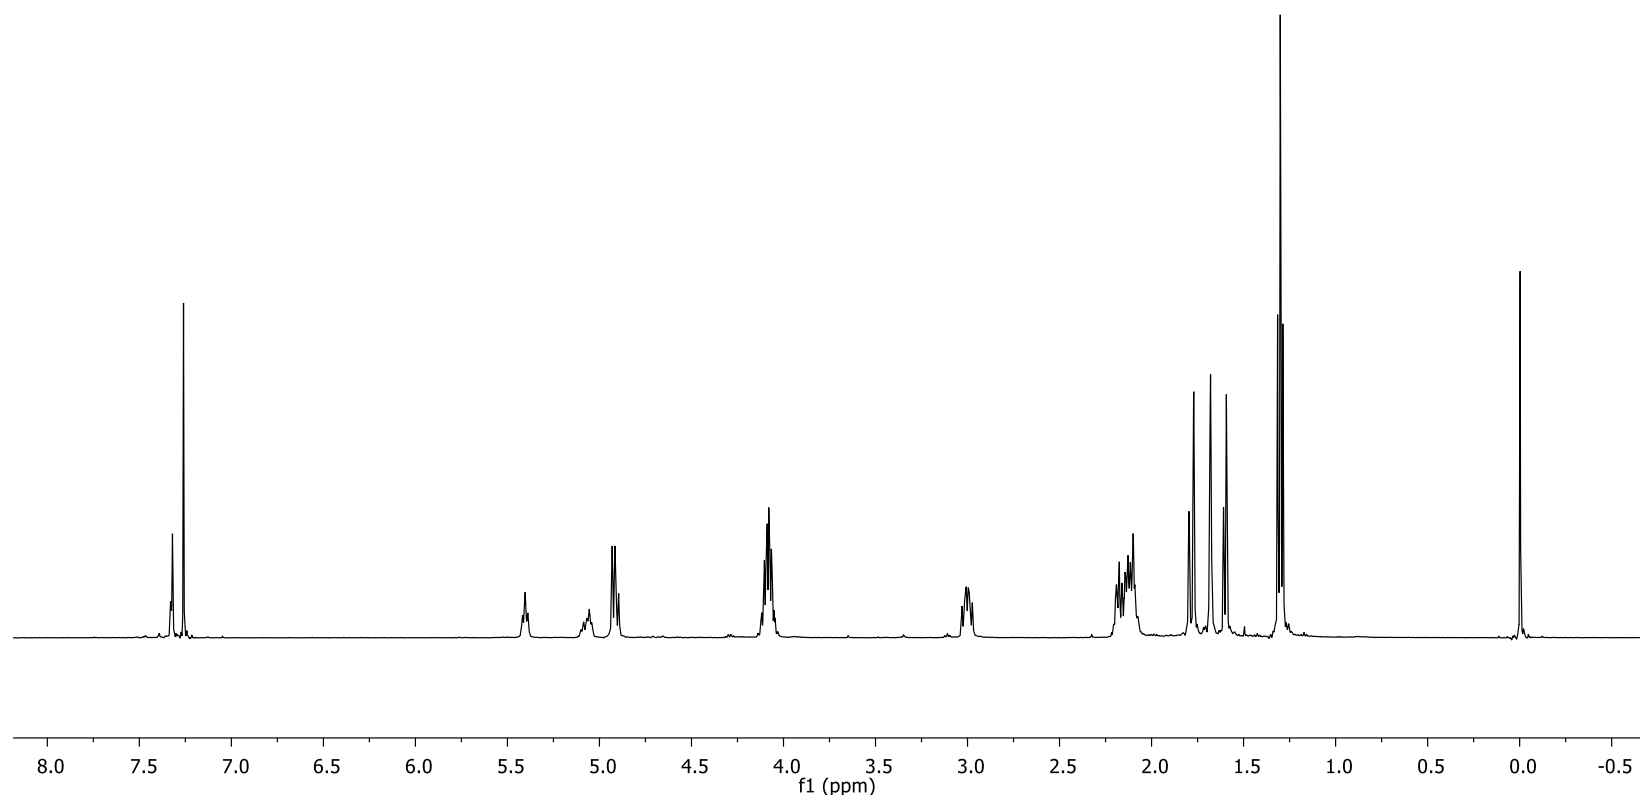

<sup>1</sup>H NMR Spectrum of Compound **26** (CDCl<sub>3</sub>, 500 MHz)

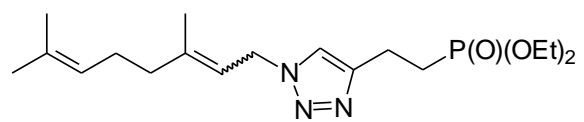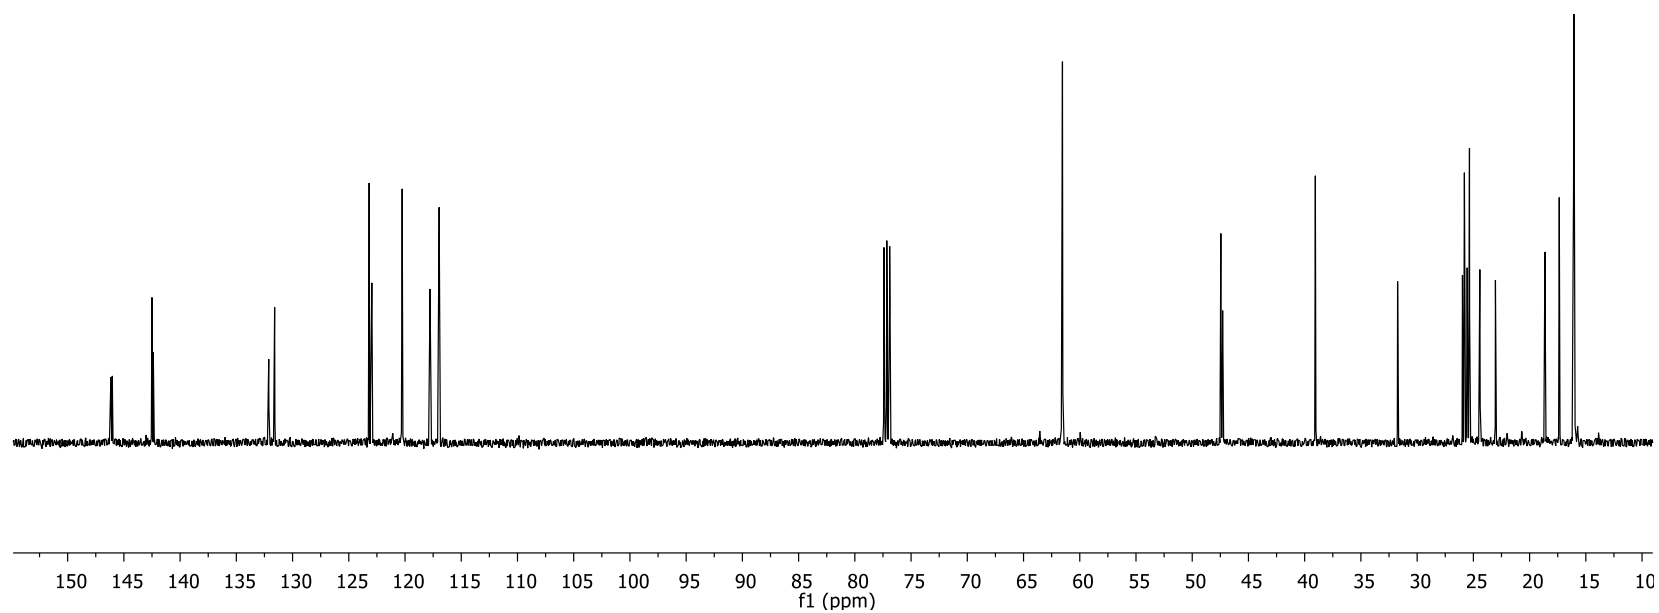

<sup>13</sup>C NMR Spectrum of Compound **26** (CDCl<sub>3</sub>, 126 MHz)

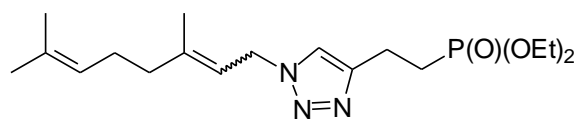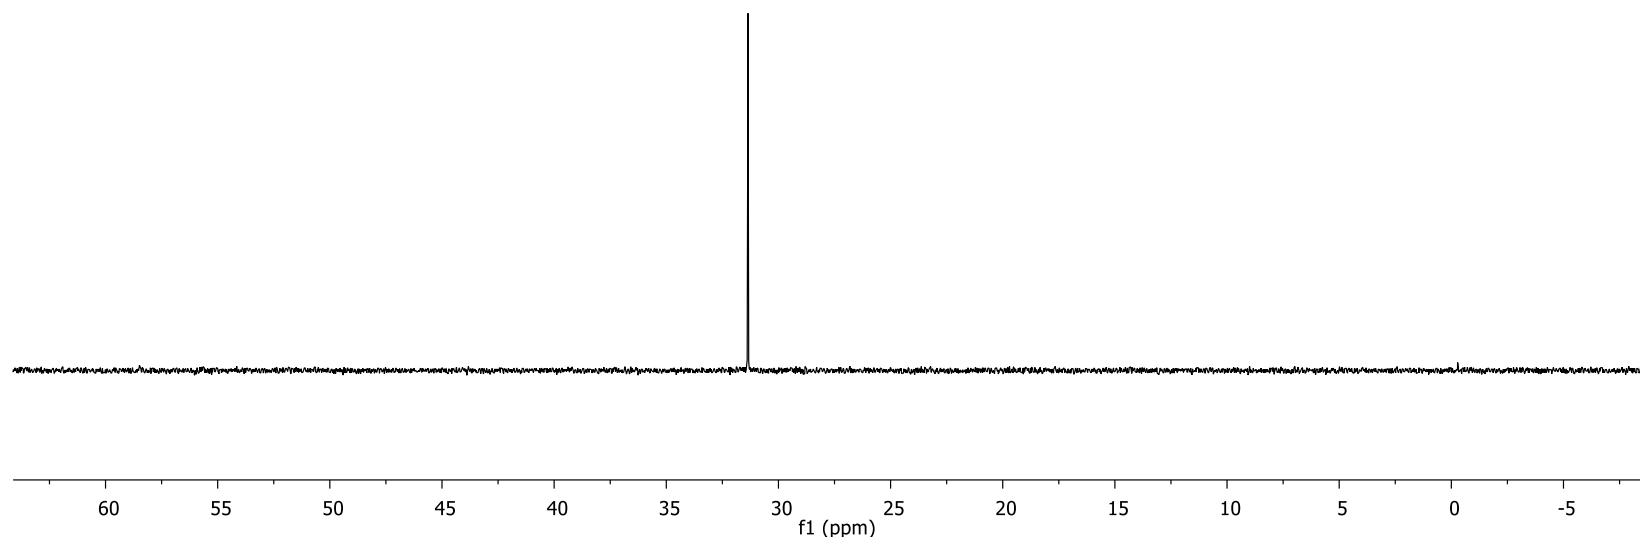

<sup>31</sup>P NMR Spectrum of Compound **26** (CDCl<sub>3</sub>, 202 MHz)

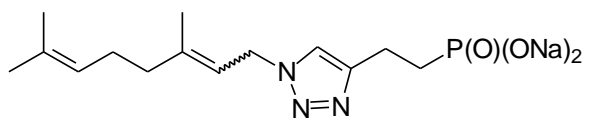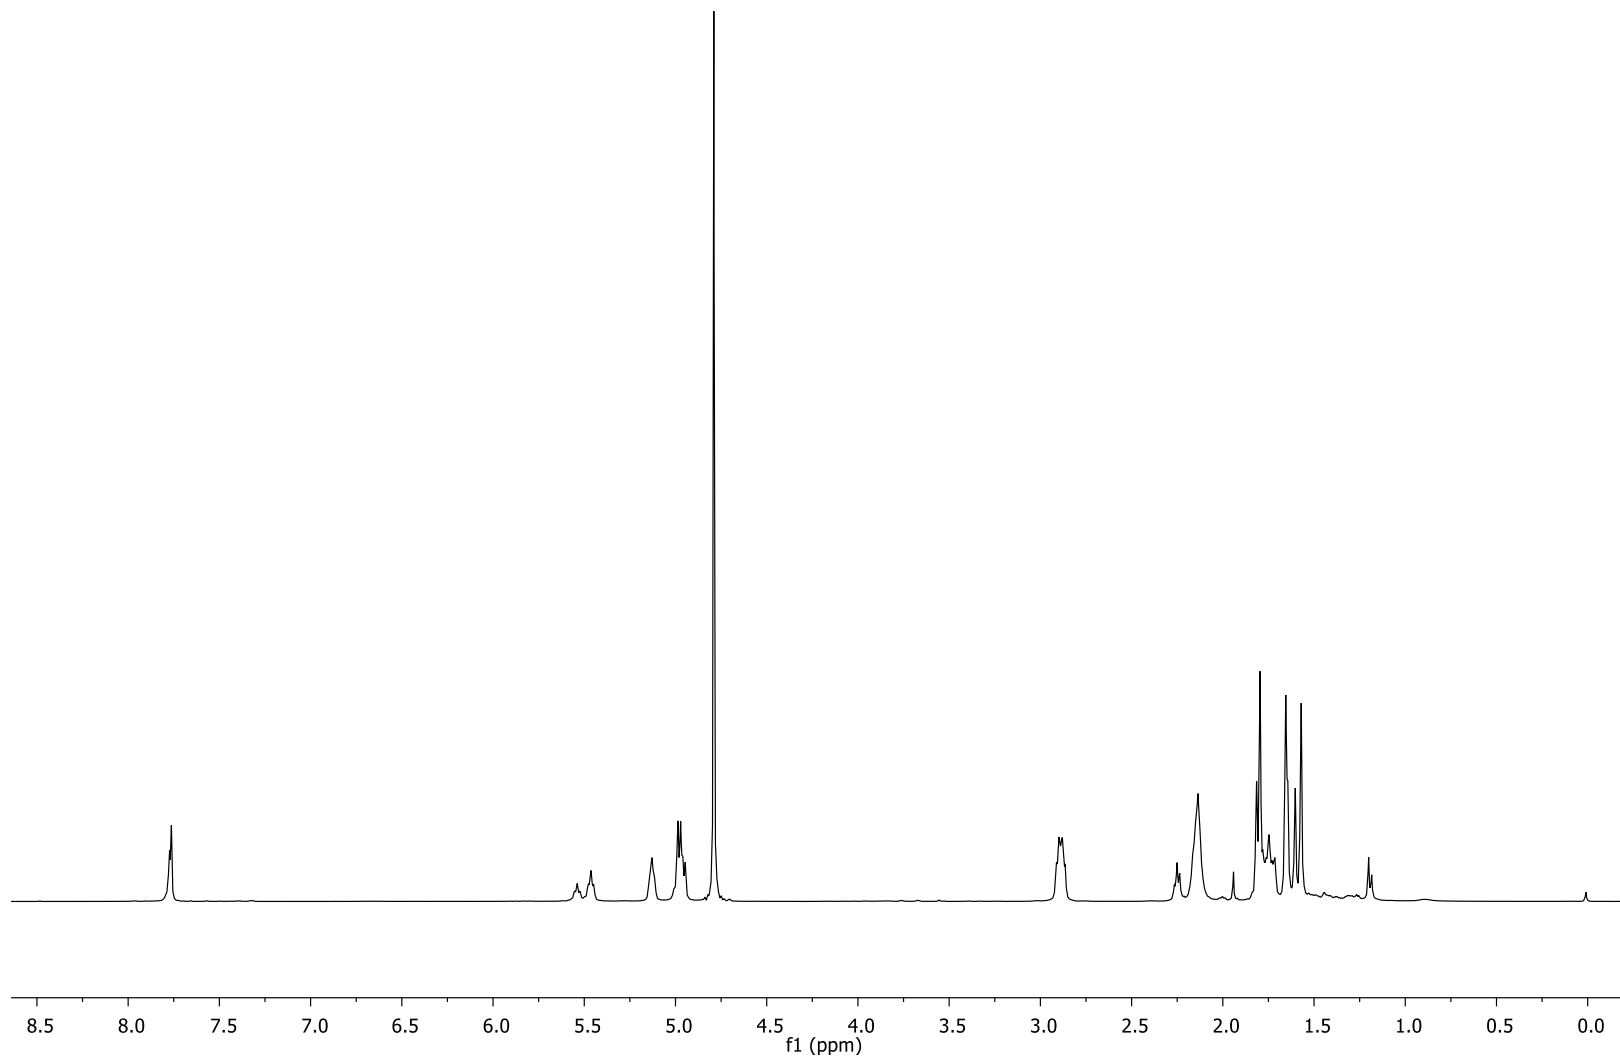

<sup>1</sup>H NMR Spectrum of Compound **27** (D<sub>2</sub>O, 500 MHz)

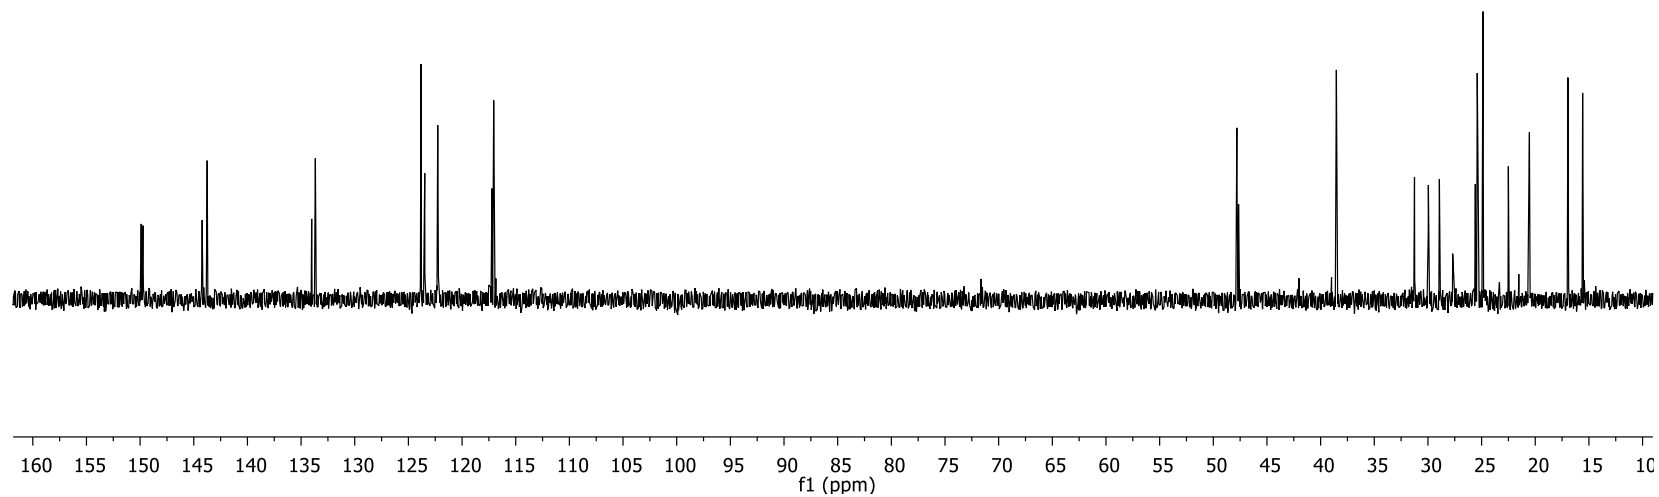

$^{13}\text{C}$  NMR Spectrum of Compound **27** ( $\text{D}_2\text{O}$ , 126 MHz)



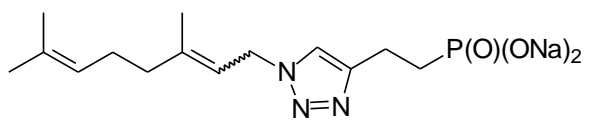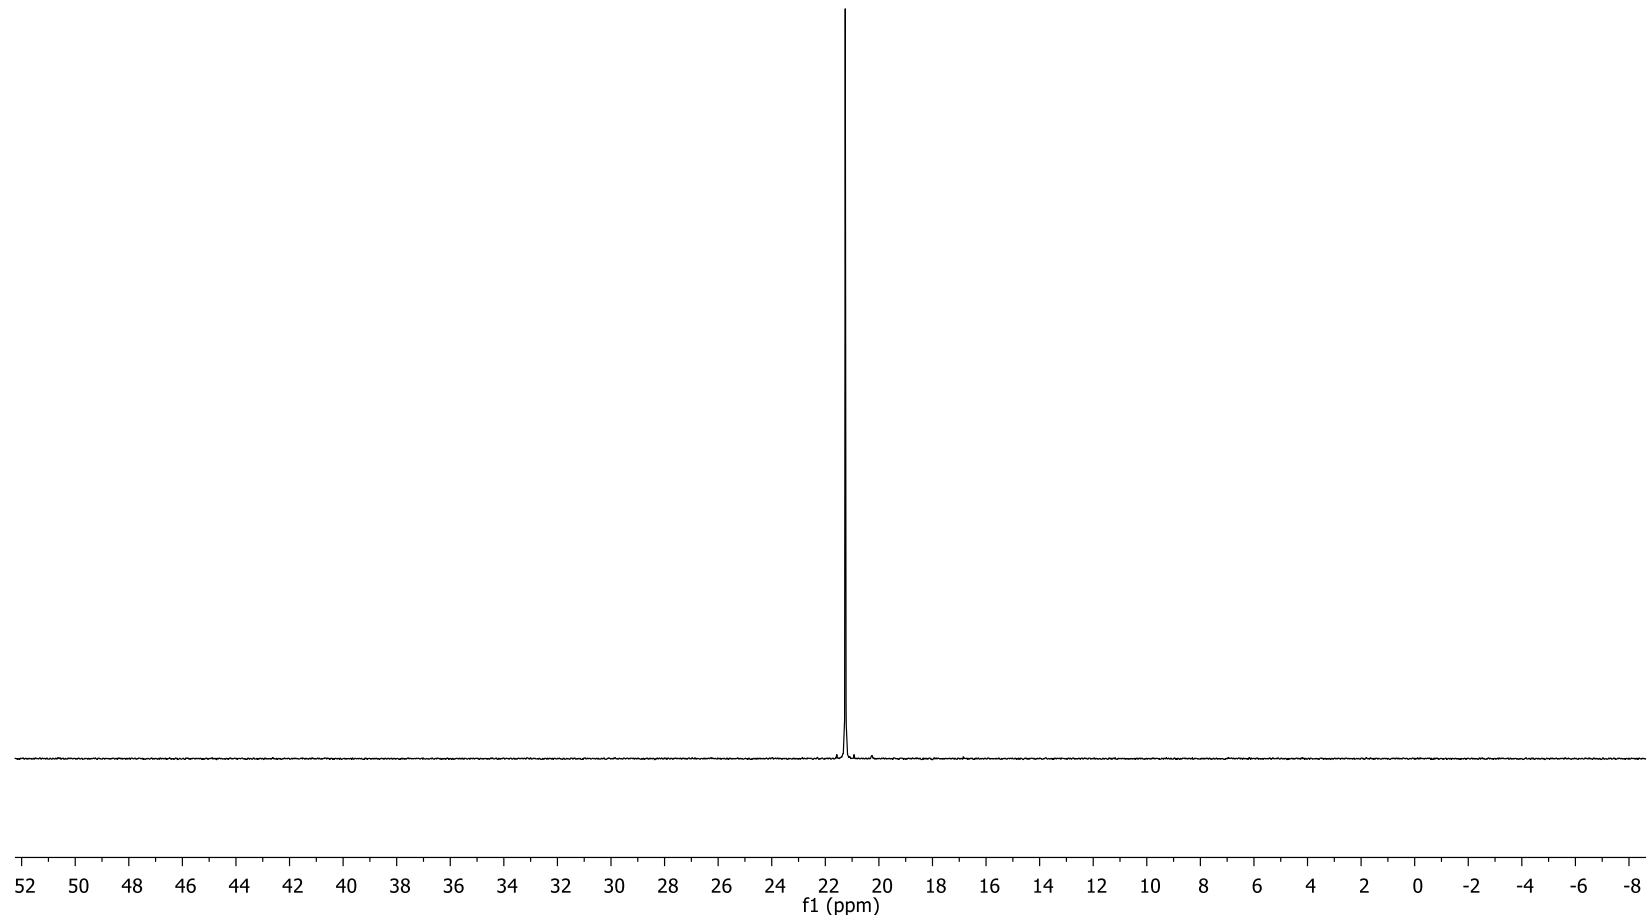

<sup>31</sup>P NMR Spectrum of Compound **27** (D<sub>2</sub>O, 202 MHz)

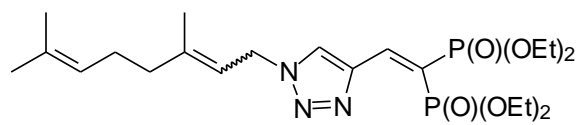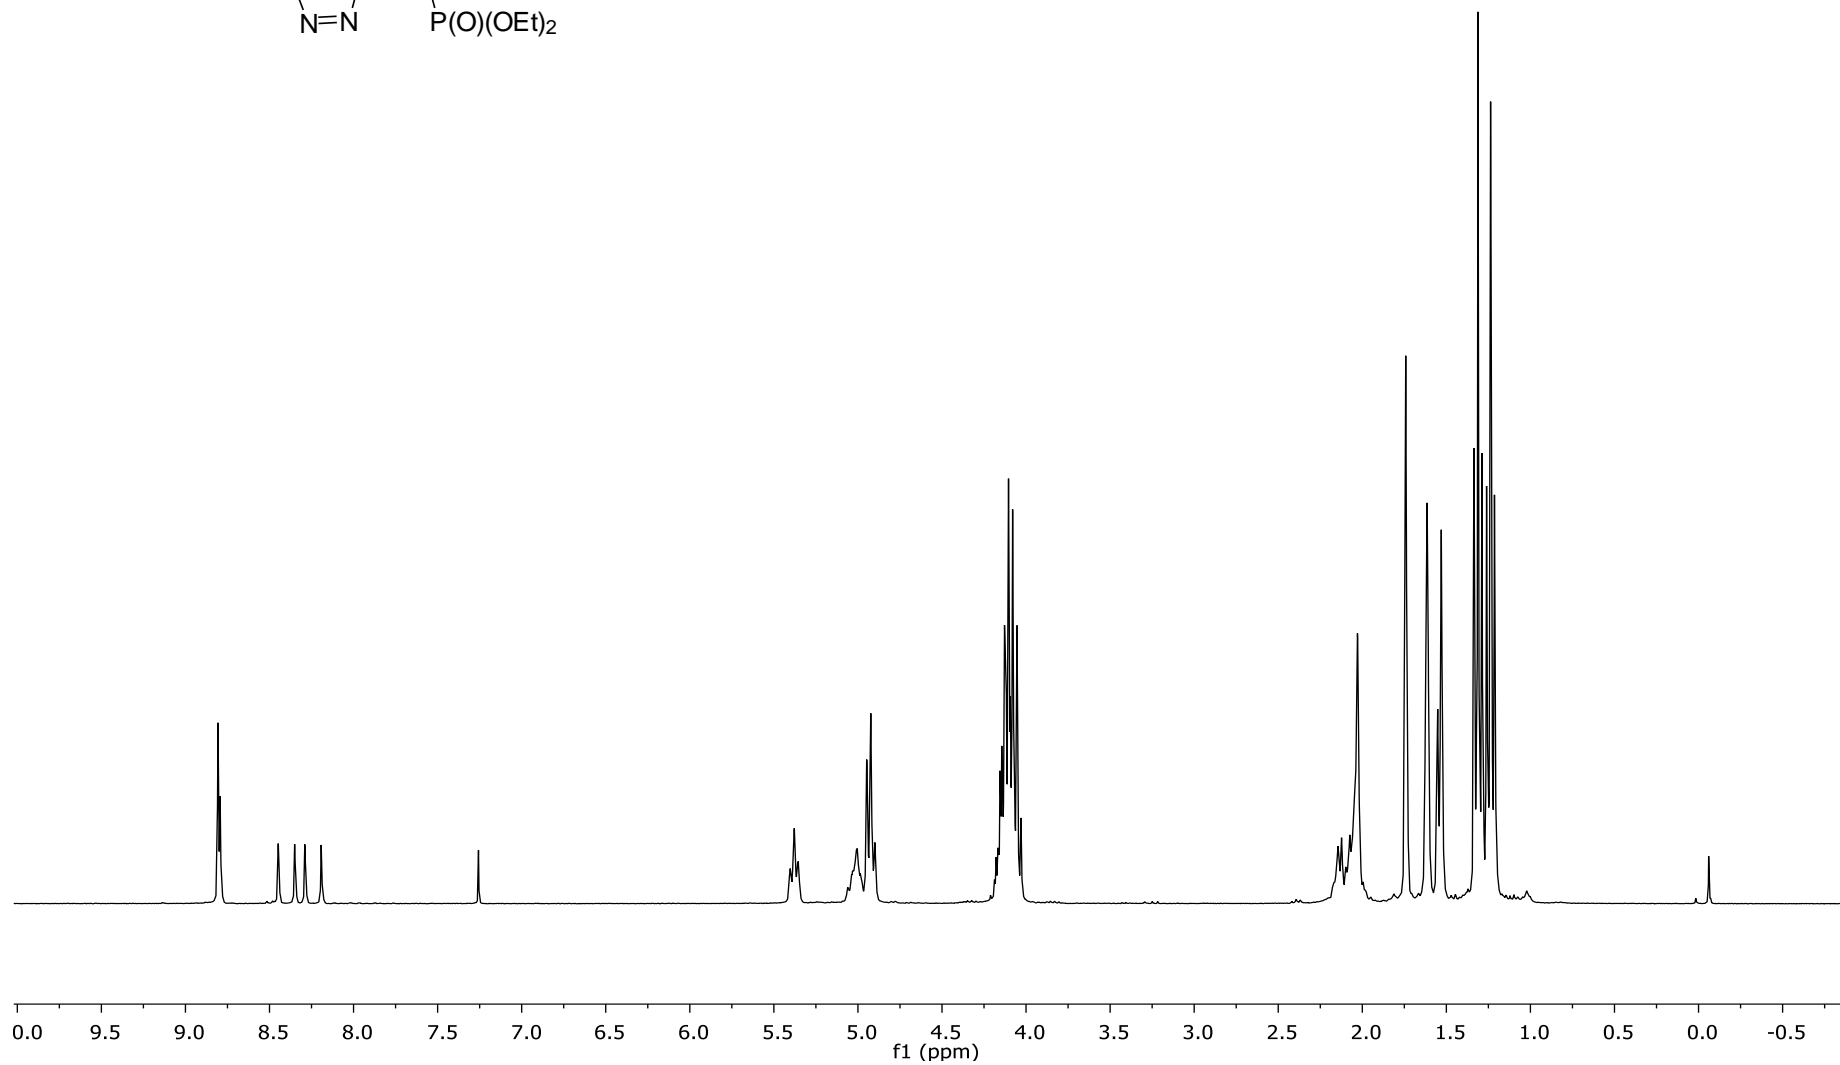

<sup>1</sup>H NMR Spectrum of Compound **28** (CDCl<sub>3</sub>, 300 MHz)

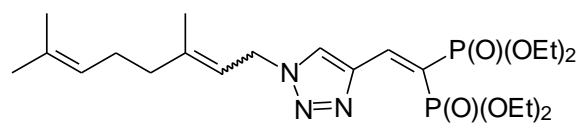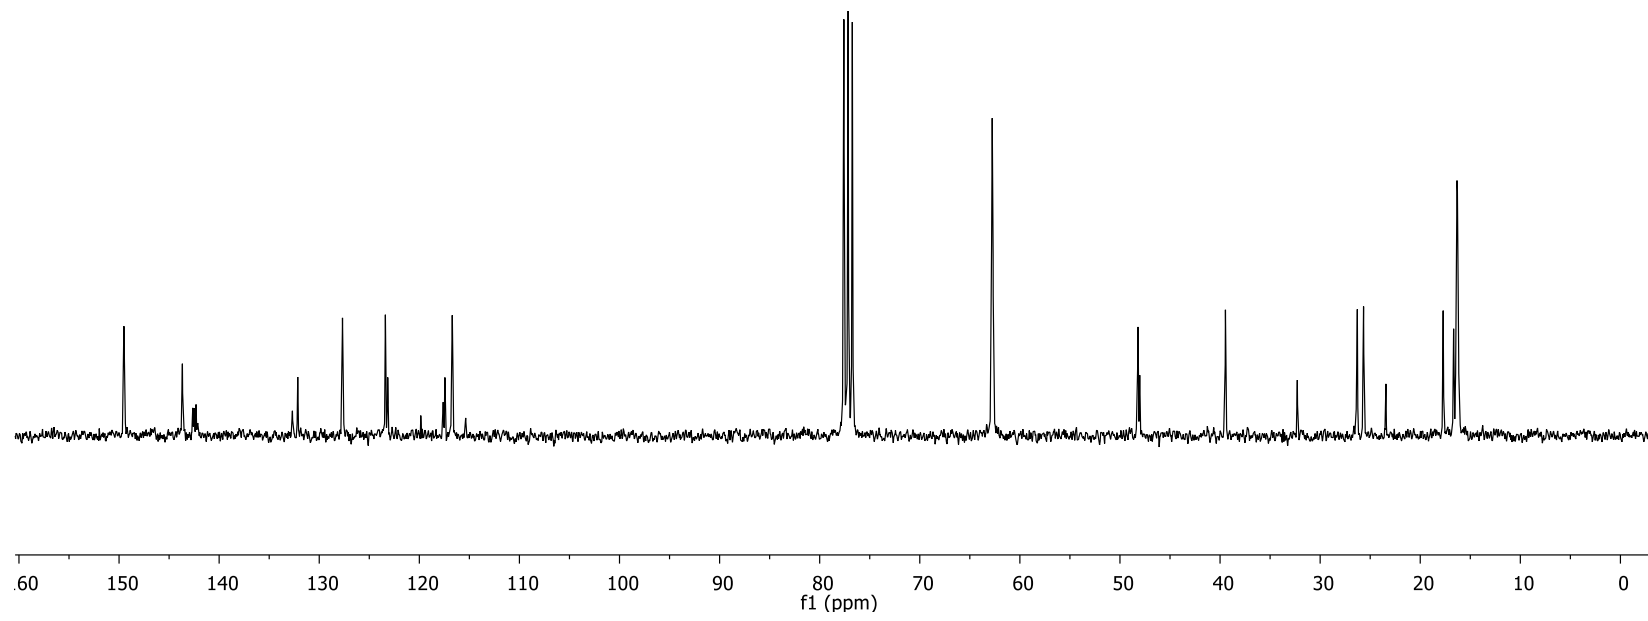

<sup>13</sup>C NMR Spectrum of Compound **28** (CDCl<sub>3</sub>, 75.5 MHz)

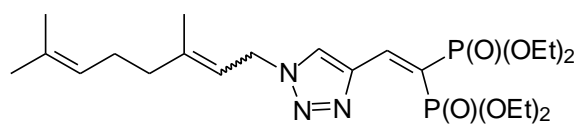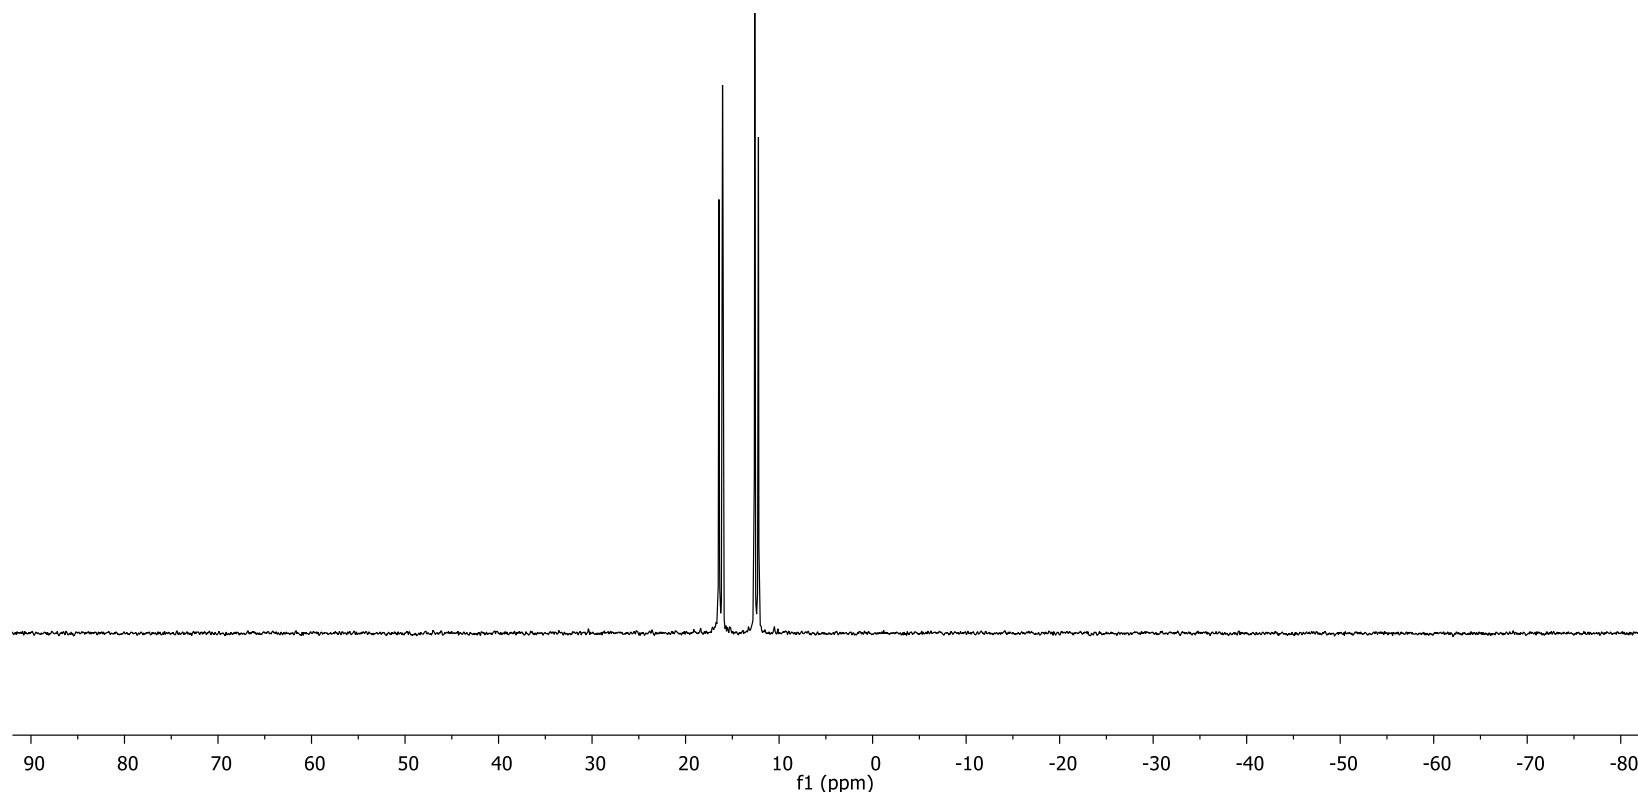

$^{31}\text{P}$  NMR Spectrum of Compound **28** ( $\text{CDCl}_3$ , 122 MHz)

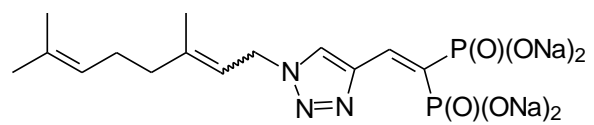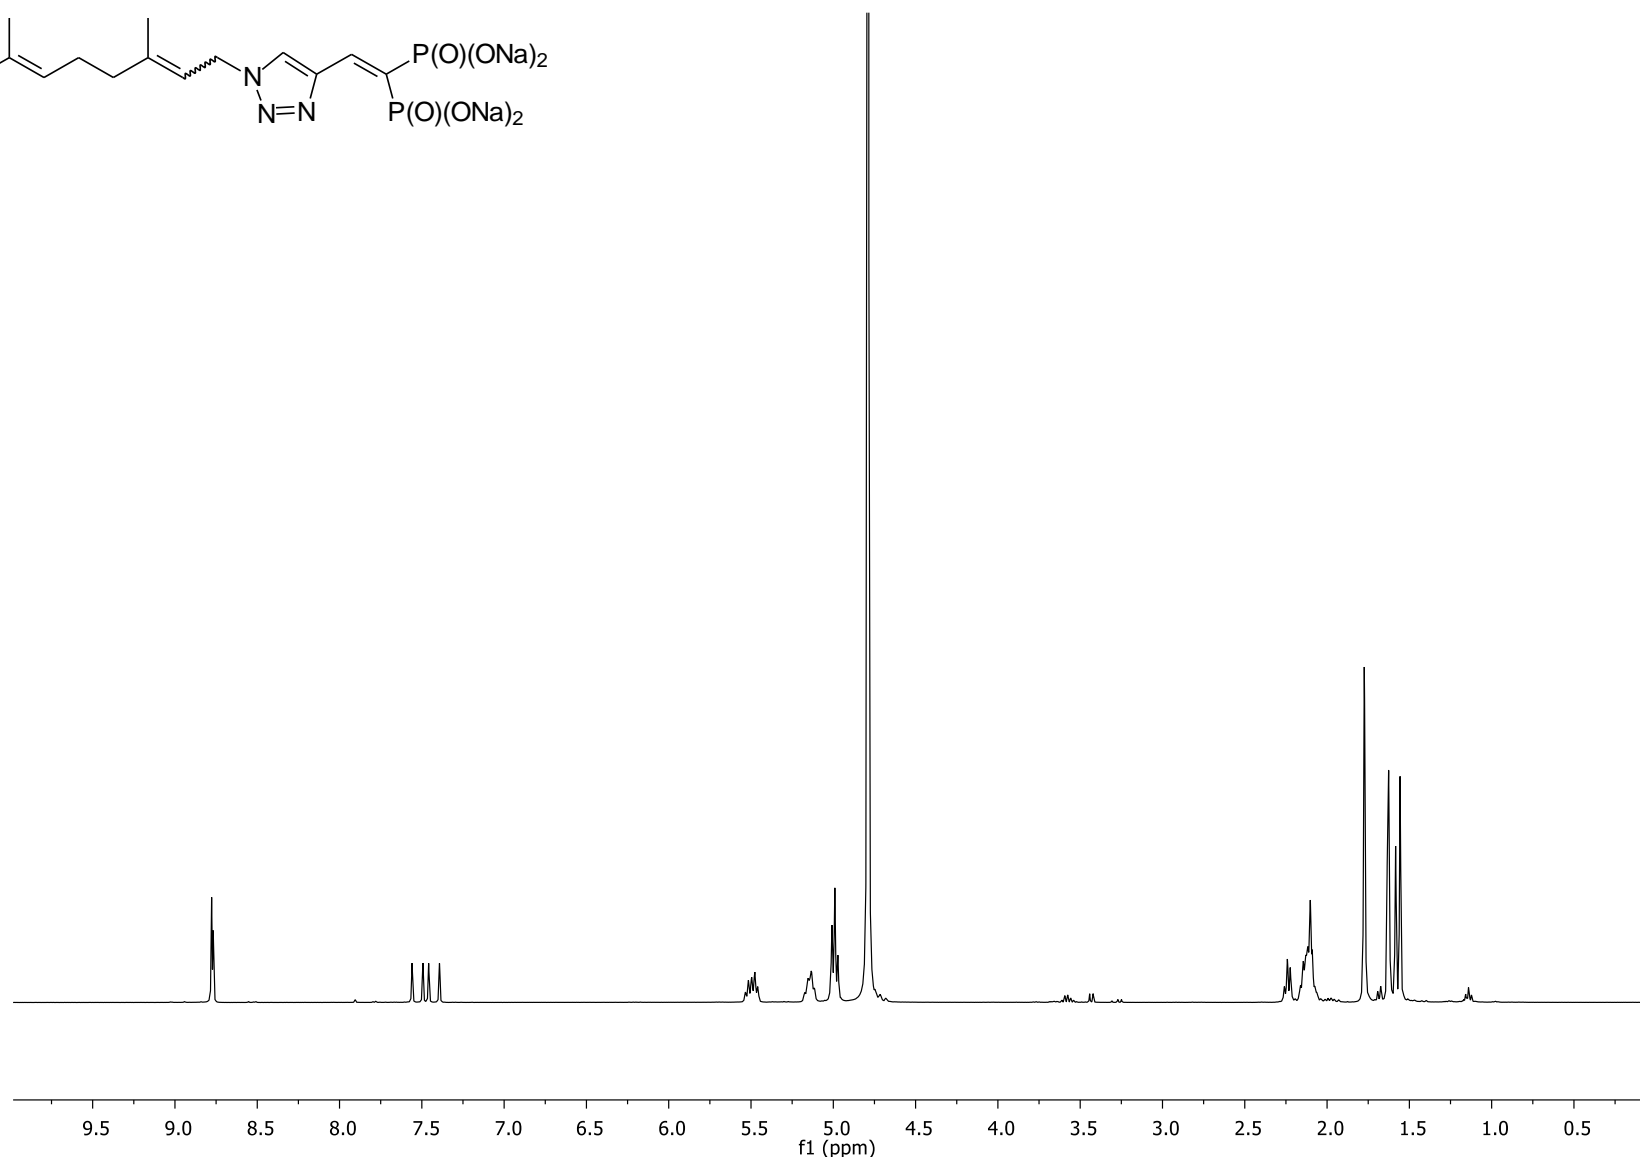

<sup>1</sup>H NMR Spectrum of Compound **29** (D<sub>2</sub>O, 400 MHz)

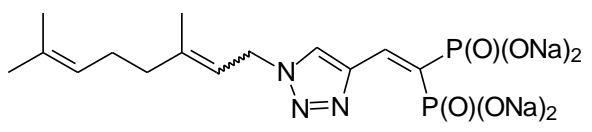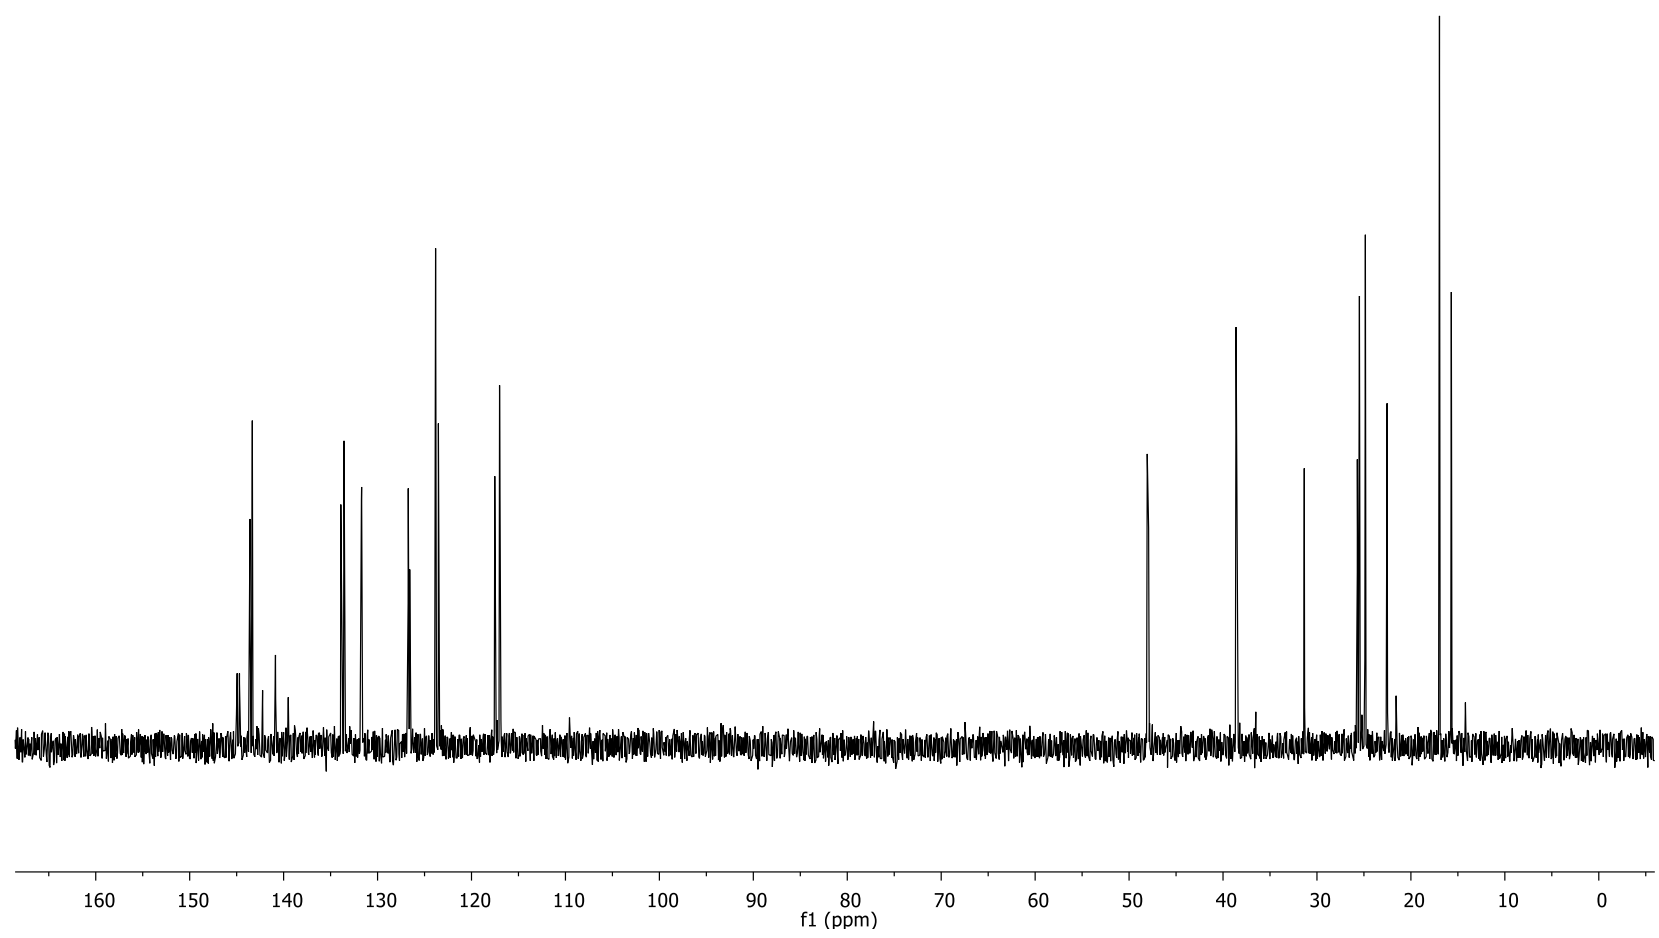

<sup>13</sup>C NMR Spectrum of Compound **29** (D<sub>2</sub>O, 100 MHz)

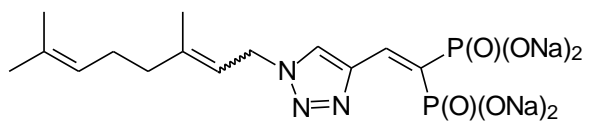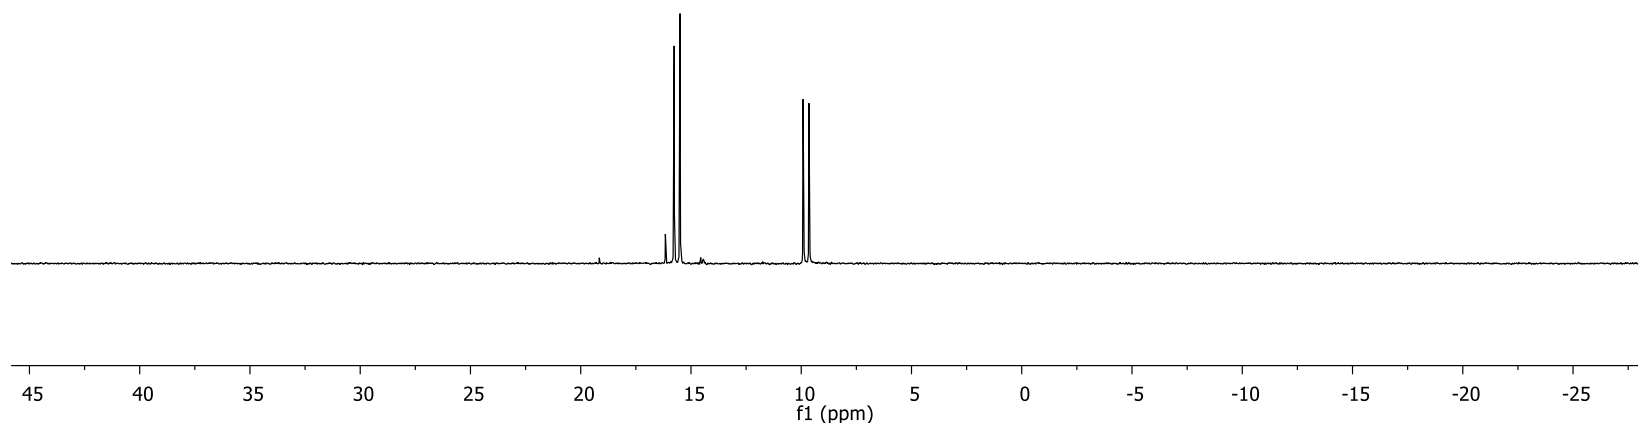

$^{31}\text{P}$  NMR Spectrum of Compound **29** ( $\text{D}_2\text{O}$ , 162 MHz)

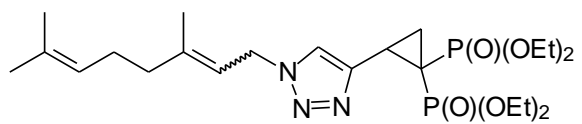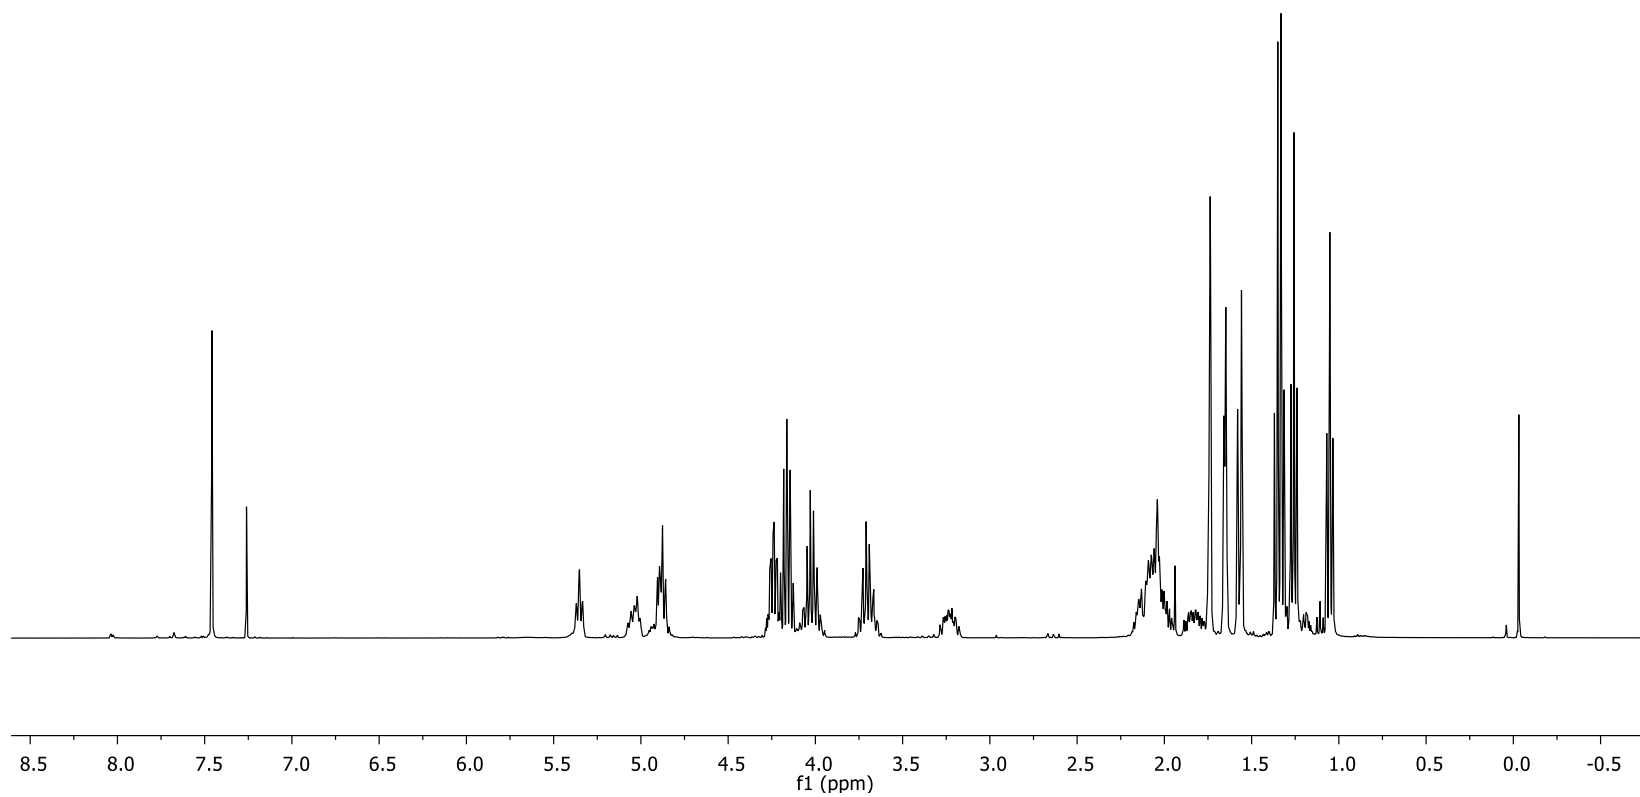

<sup>1</sup>H NMR Spectrum of Compound **30** (CDCl<sub>3</sub>, 400 MHz)



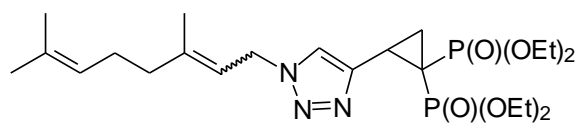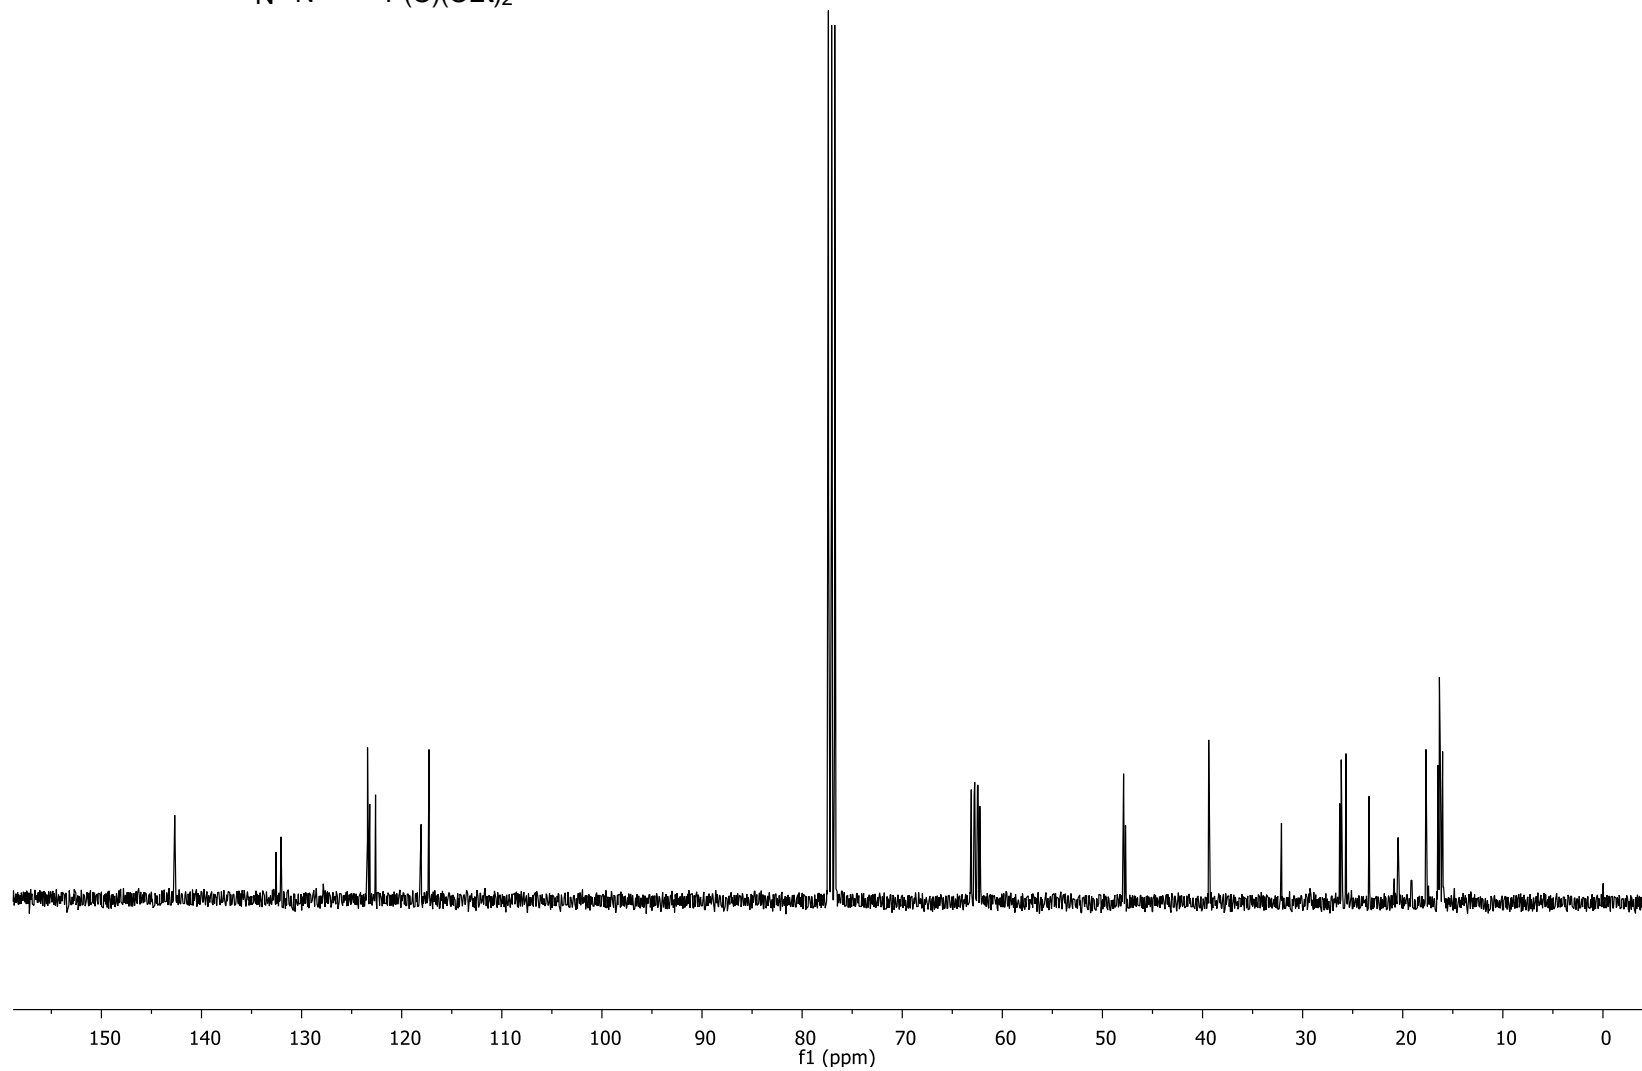

<sup>13</sup>C NMR Spectrum of Compound **30** (CDCl<sub>3</sub>, 100 MHz)

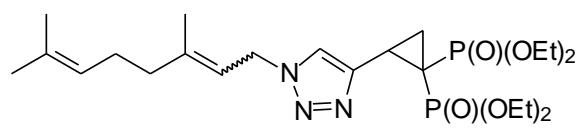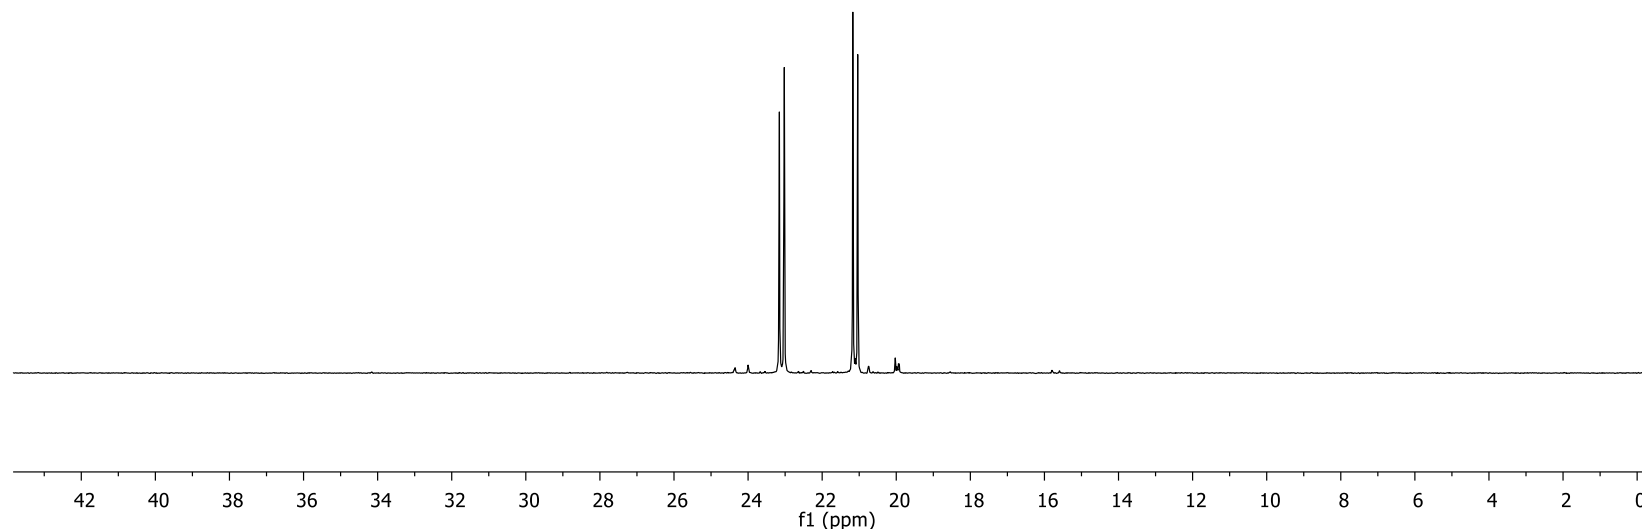

$^{31}\text{P}$  NMR Spectrum of Compound **30** ( $\text{CDCl}_3$ , 162 MHz)

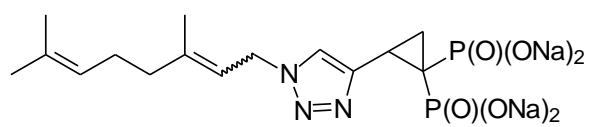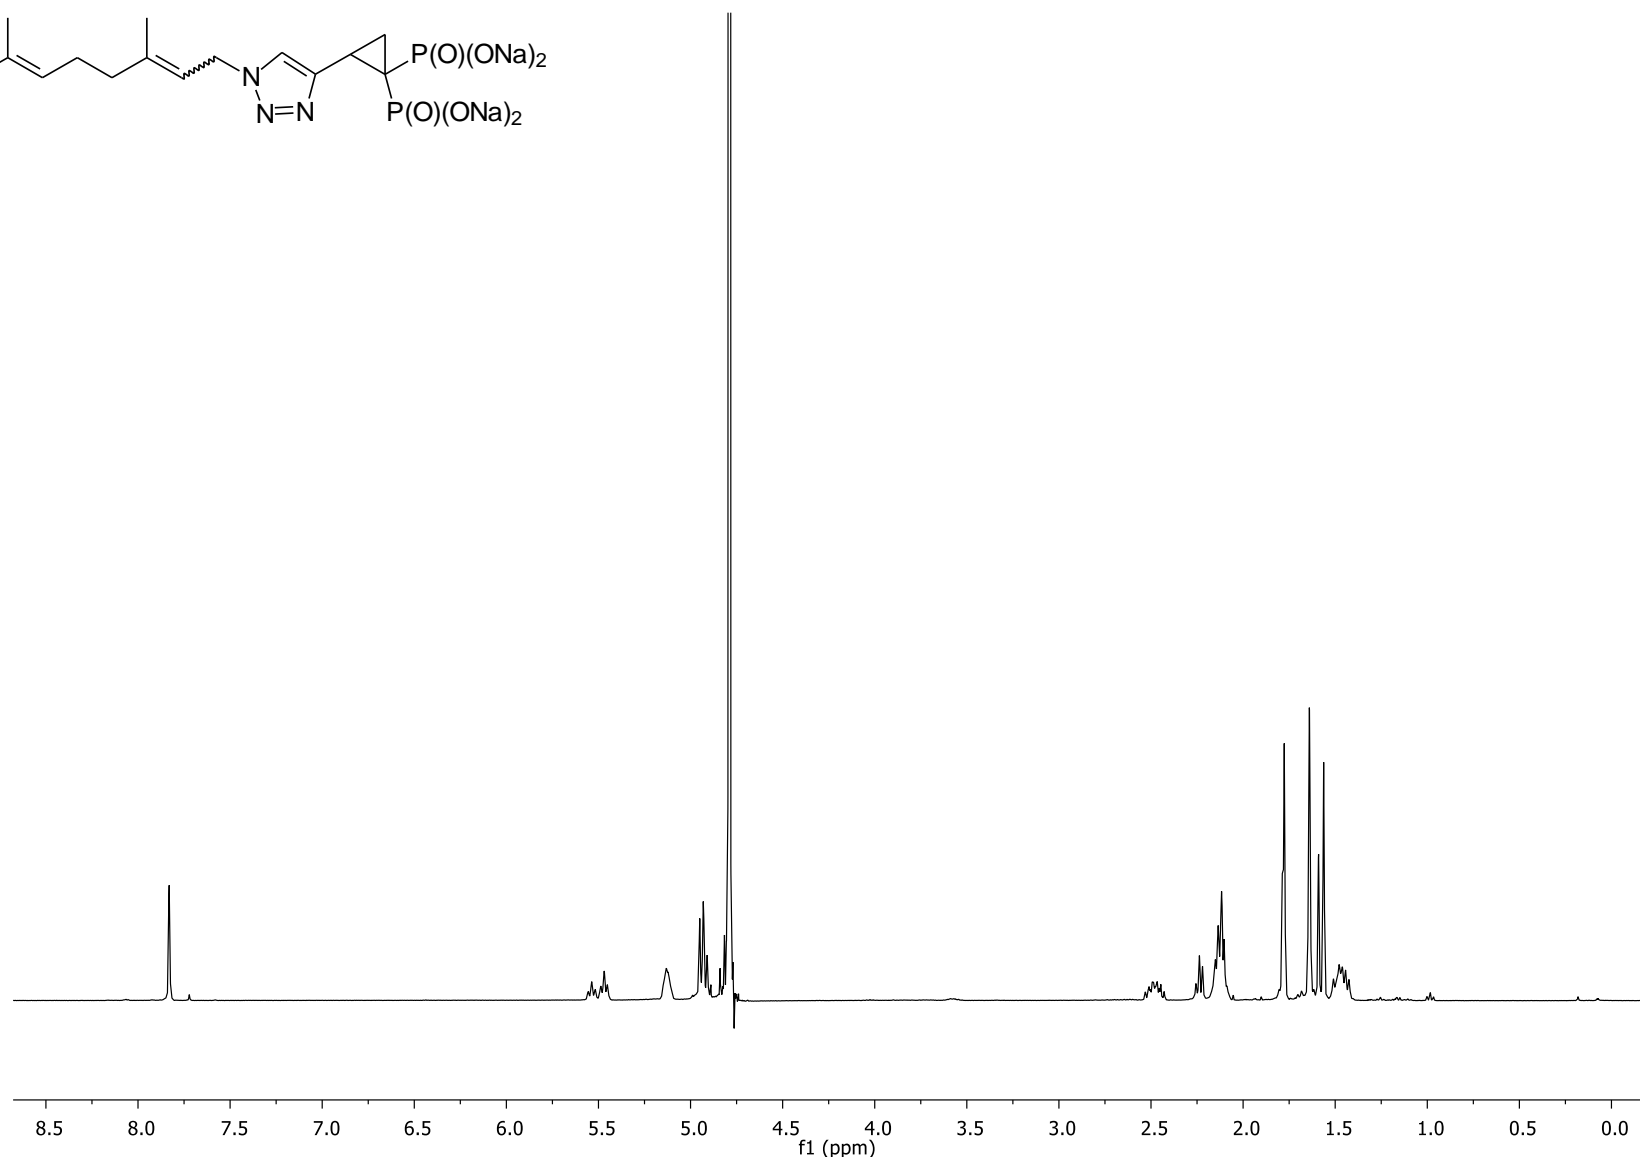

$^1\text{H}$  NMR Spectrum of Compound **31** ( $\text{D}_2\text{O}$ , 400 MHz)

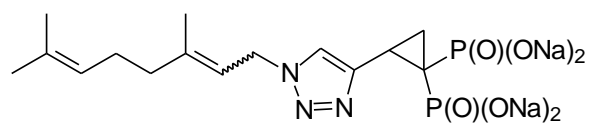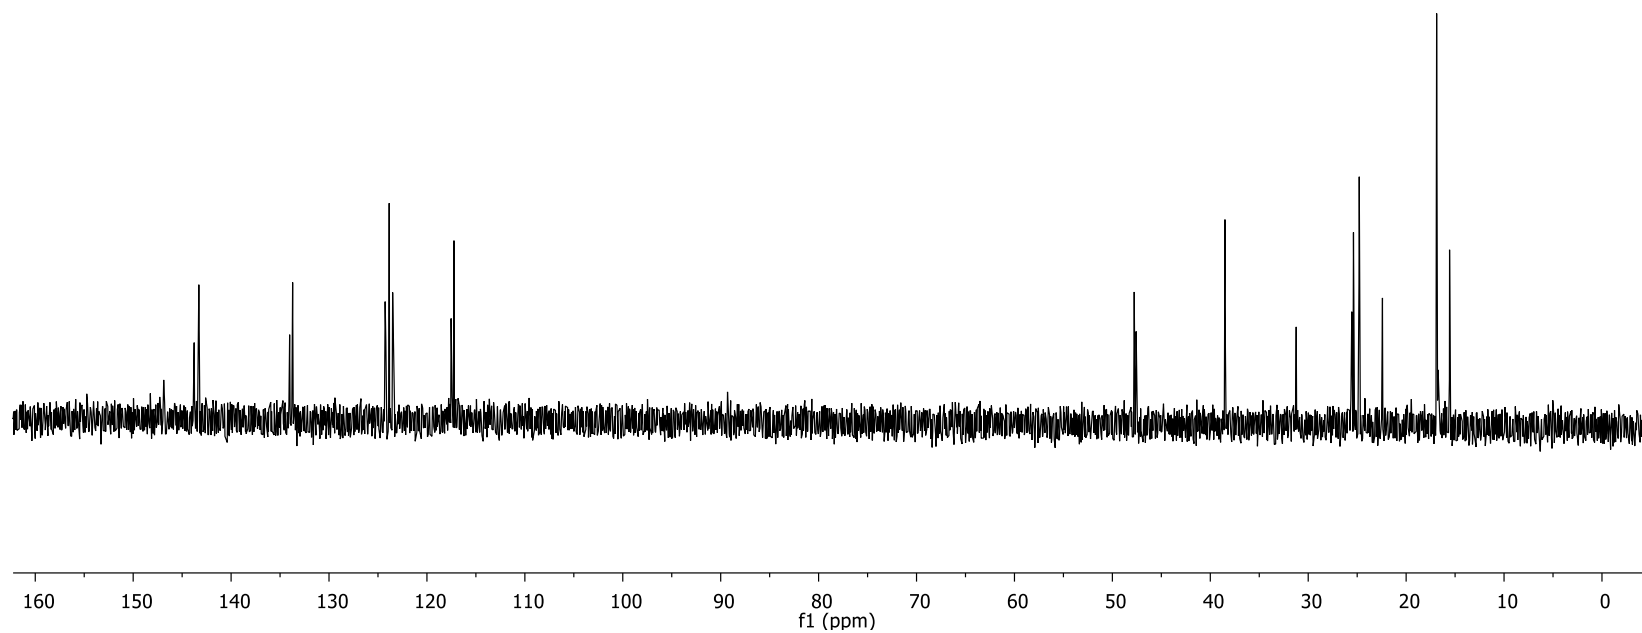

<sup>13</sup>C NMR Spectrum of Compound 31 (D<sub>2</sub>O, 100 MHz)

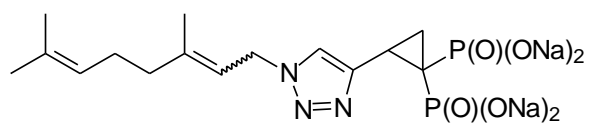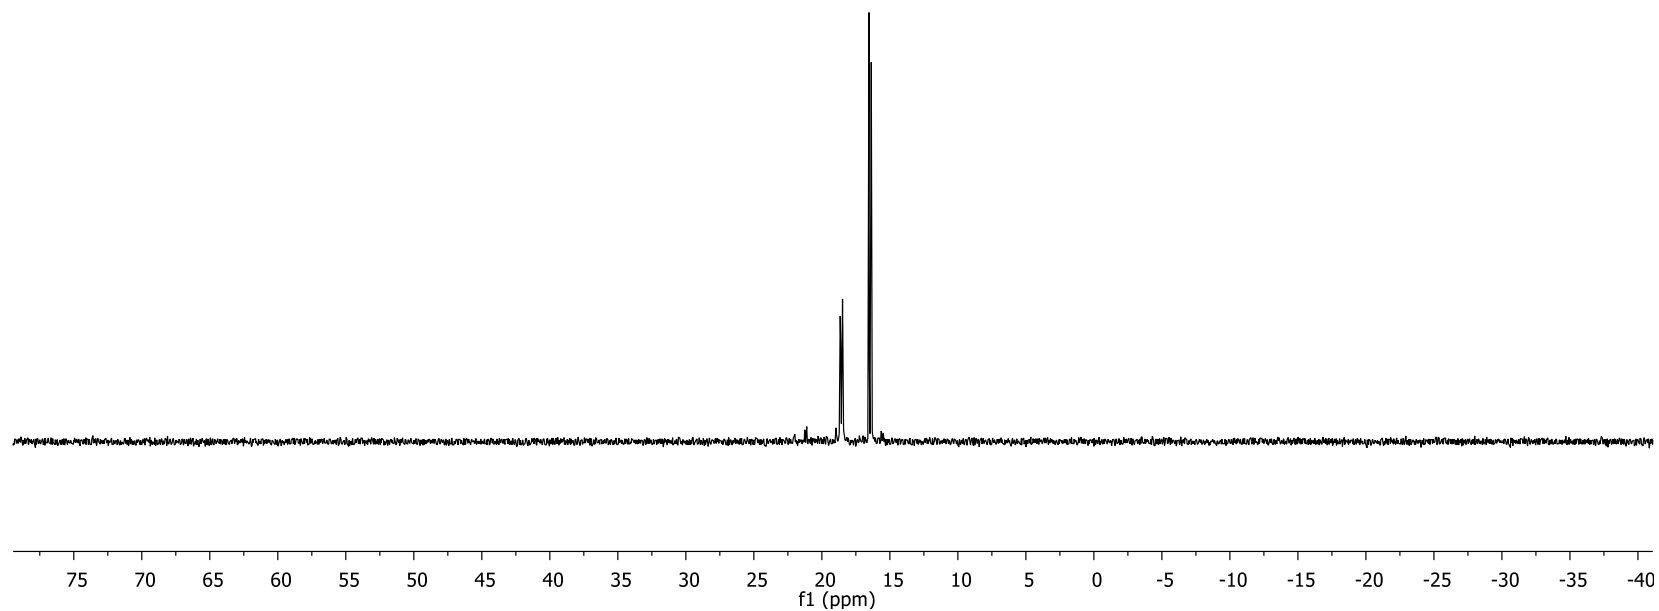

$^{31}\text{P}$  NMR Spectrum of Compound **31** ( $\text{D}_2\text{O}$ , 162 MHz)

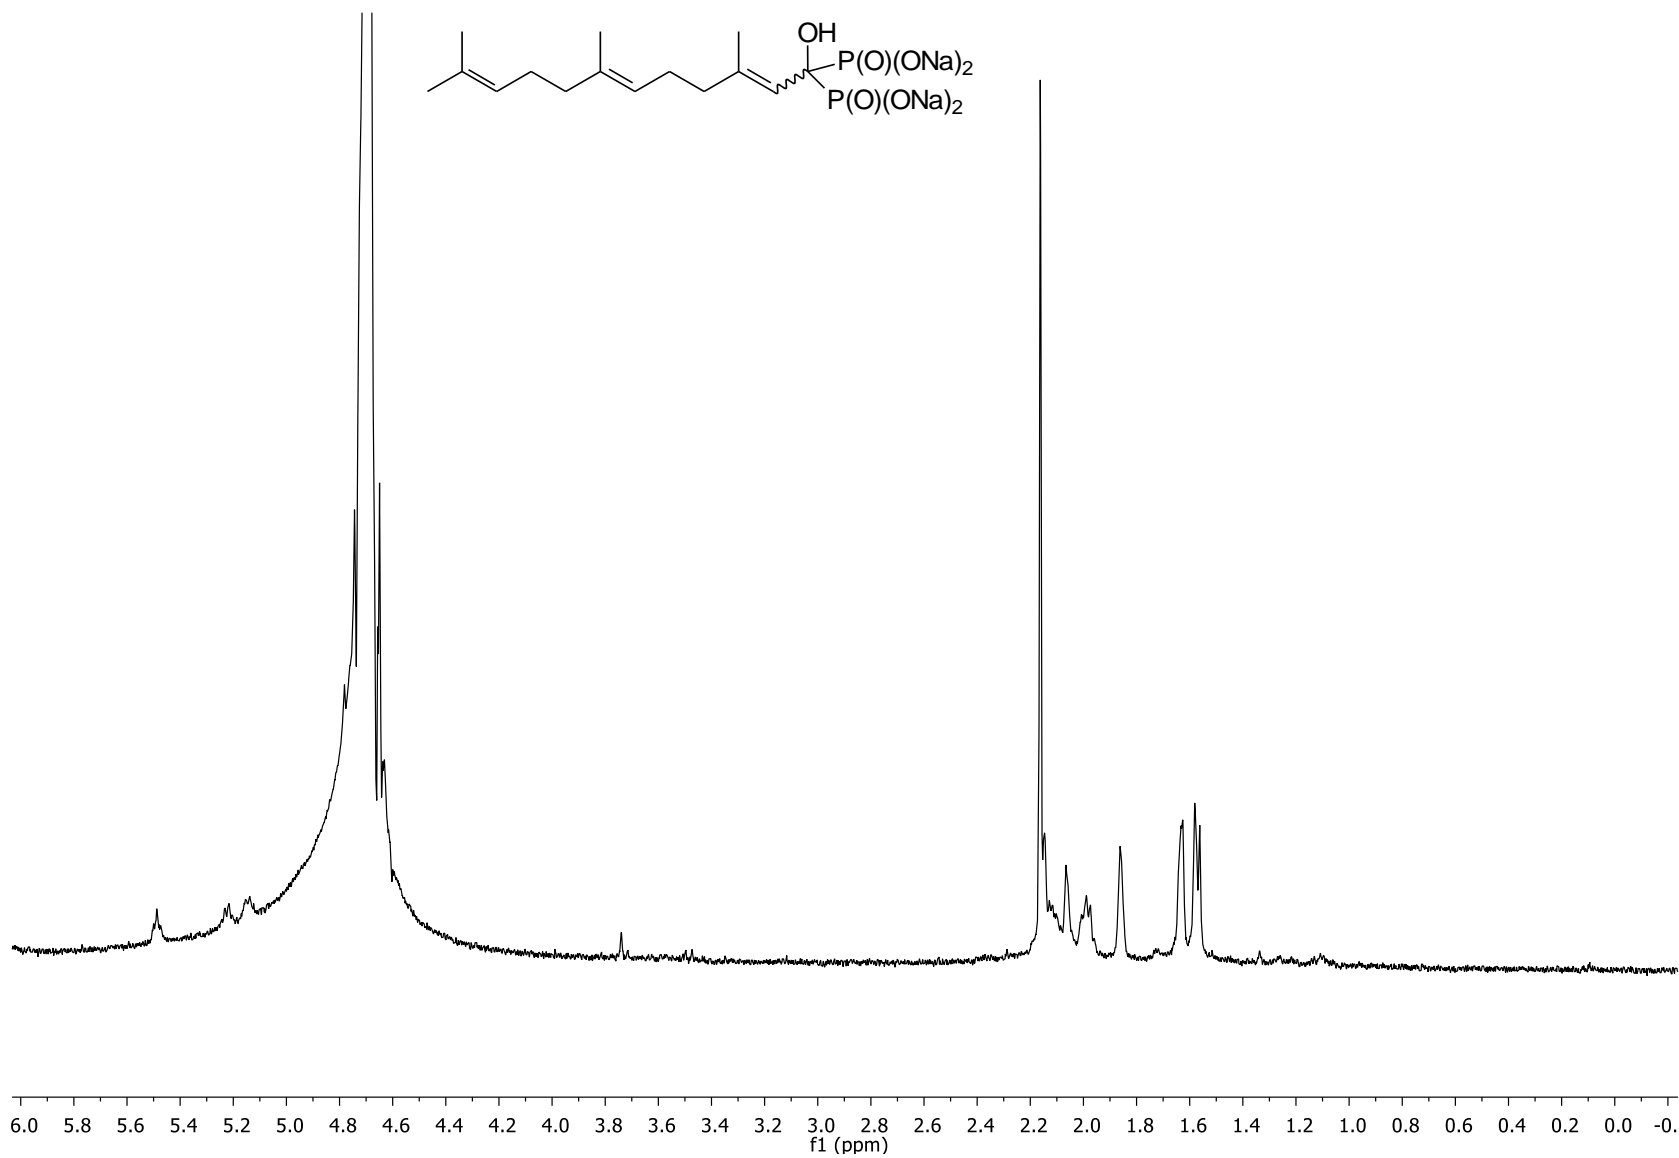

$^1\text{H}$  NMR Spectrum of Compound **34** ( $\text{D}_2\text{O}$ , 500 MHz)

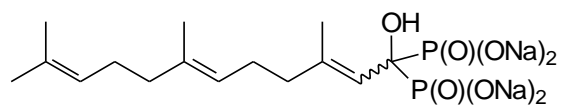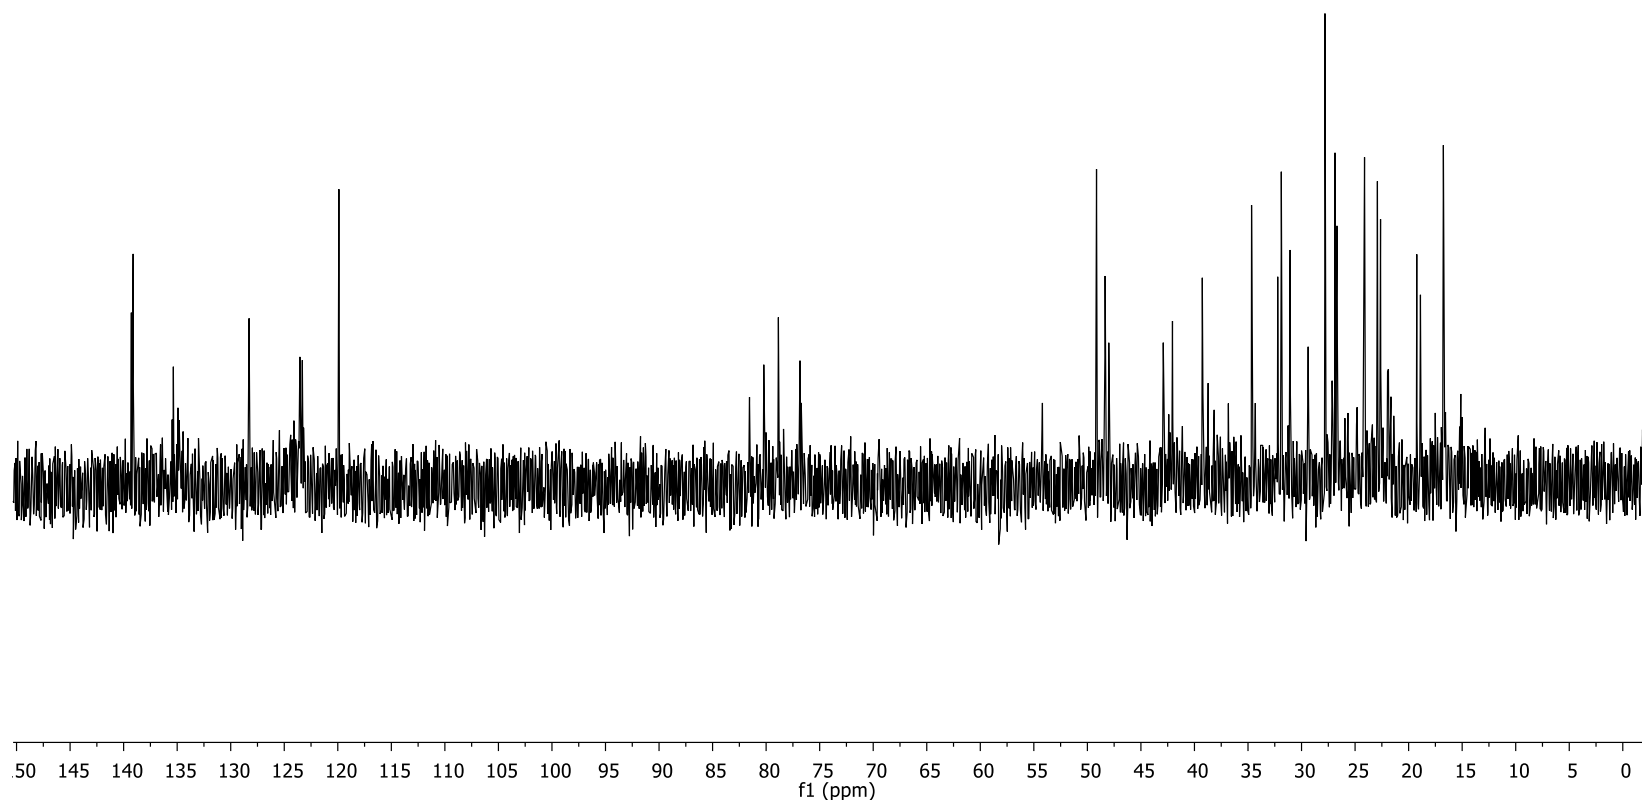

<sup>13</sup>C NMR Spectrum of Compound **34** (D<sub>2</sub>O, 100 MHz)

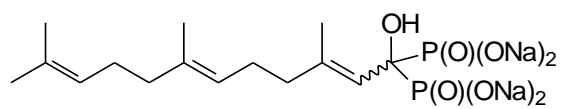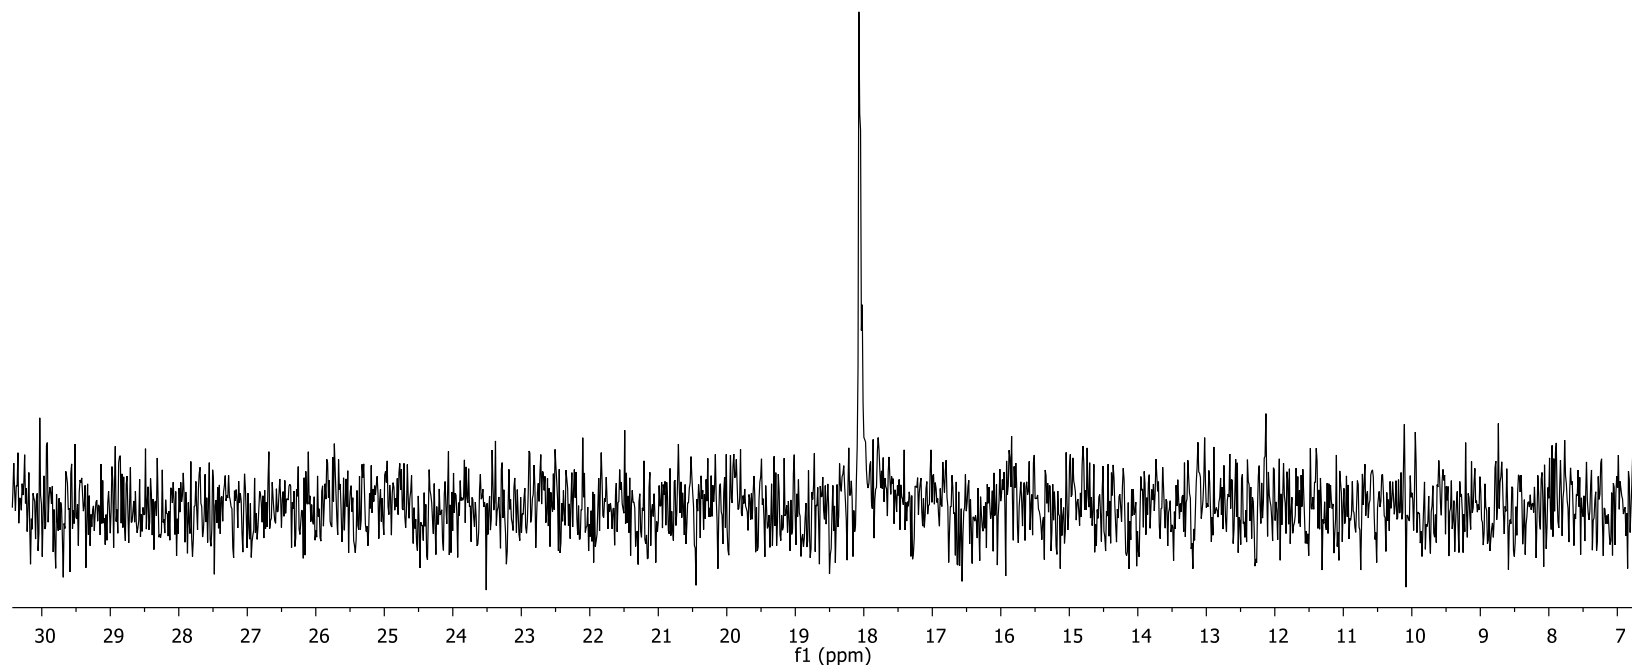

<sup>31</sup>P NMR Spectrum of Compound **34** (D<sub>2</sub>O, 162 MHz)



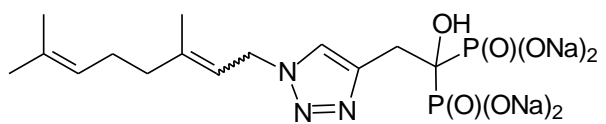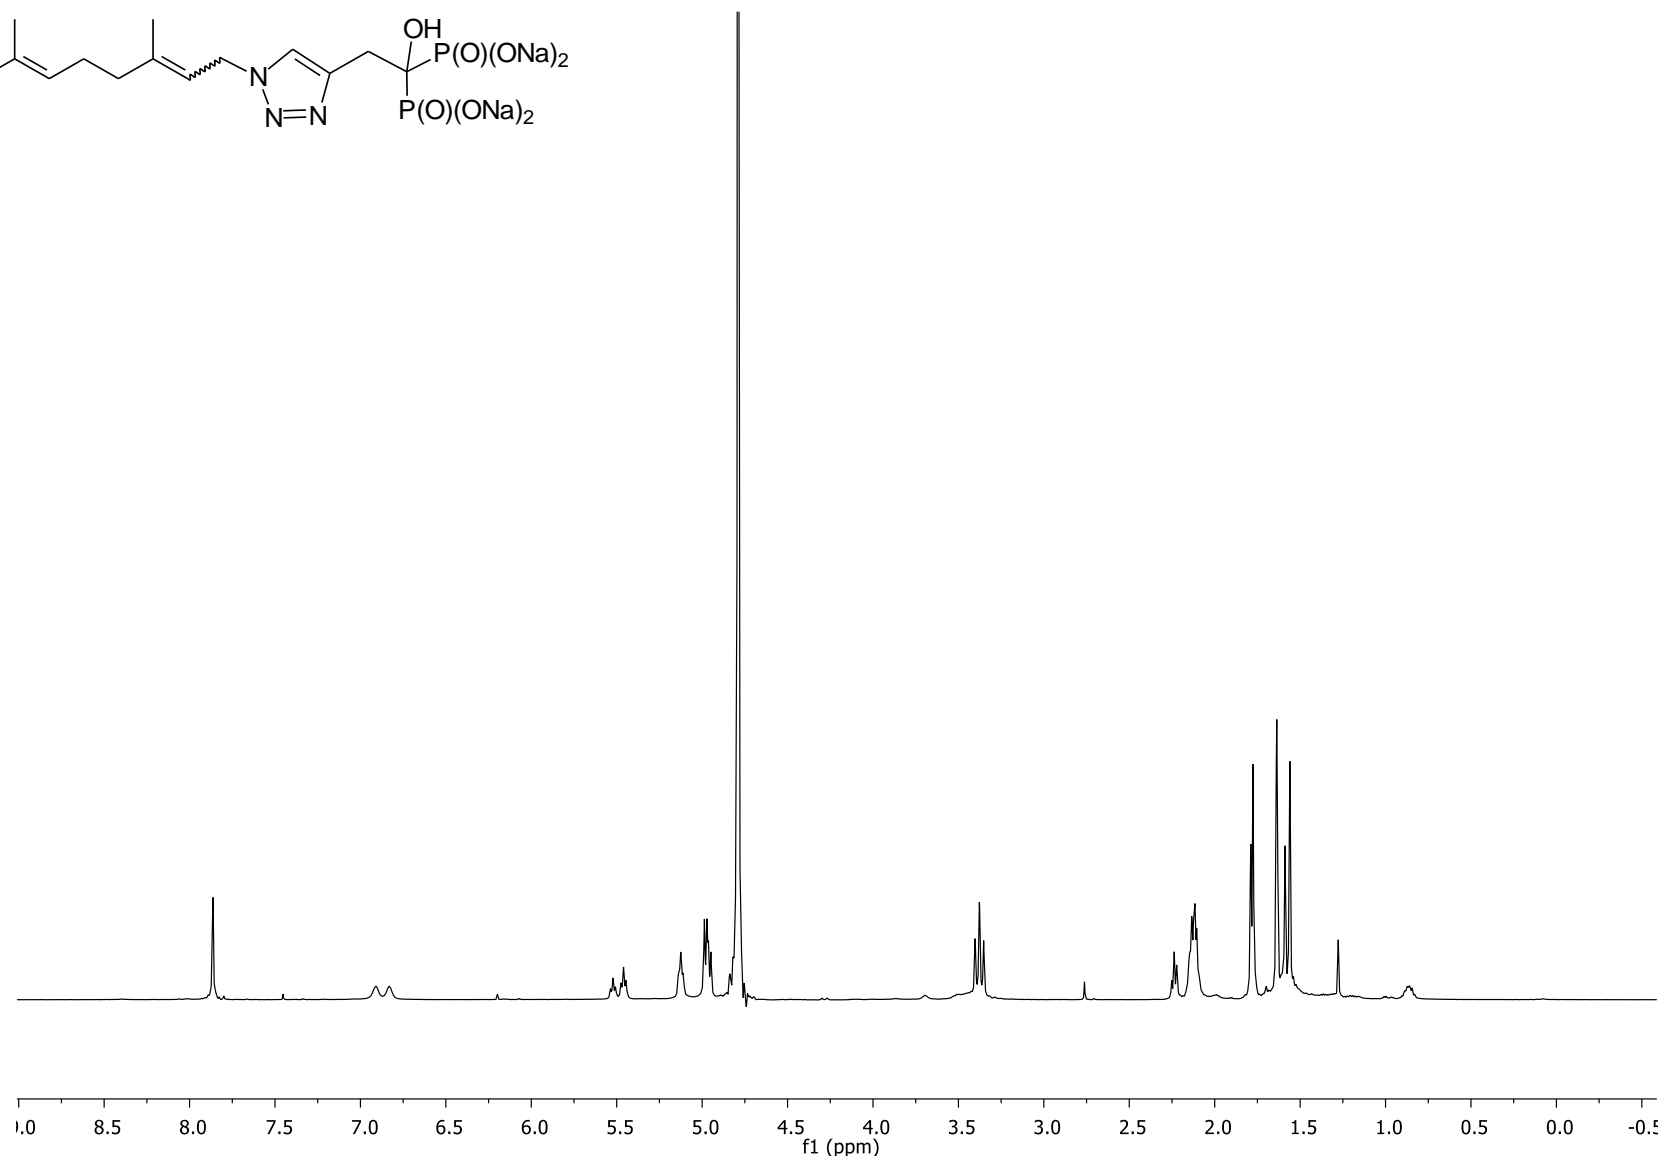

$^1\text{H}$  NMR Spectrum of Compound **37** ( $\text{D}_2\text{O}$ , 500 MHz)

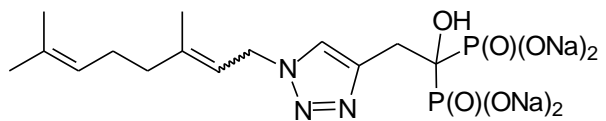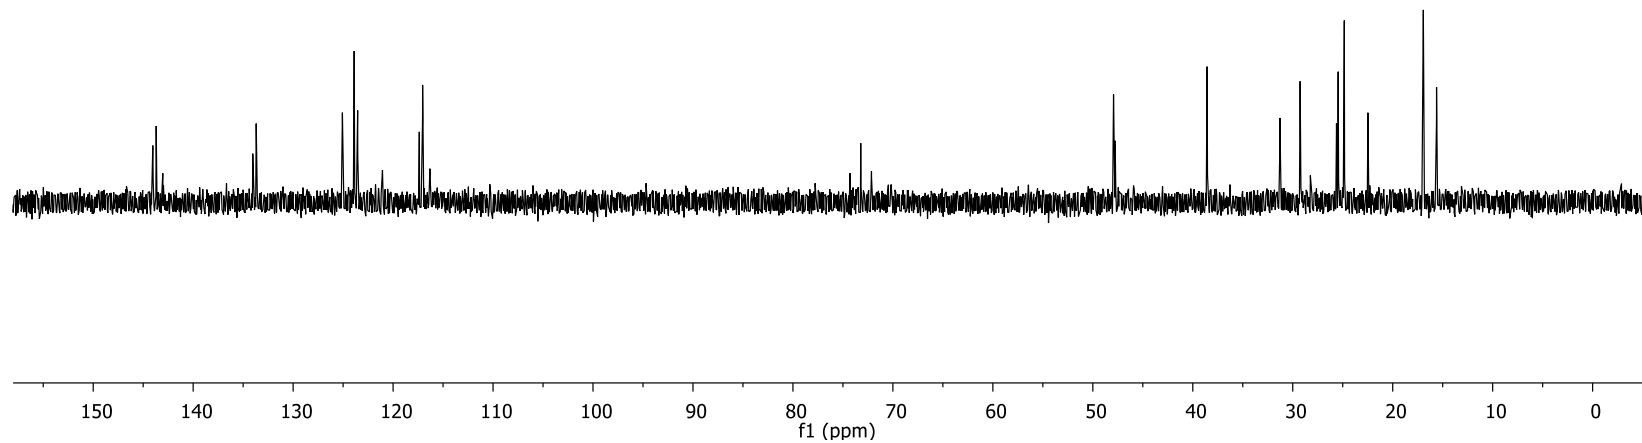

<sup>13</sup>C NMR Spectrum of Compound 37 (D<sub>2</sub>O, 126 MHz)



Data File C:\Users\Public\Documents\ChemStation\1\Data\Demo\AERF-03-023.D  
Sample Name:

```
=====
Acq. Operator   : SYSTEM
Sample Operator : SYSTEM
Acq. Instrument : Shared 1220           Location : 1
Injection Date  : 12/2/2020 10:29:34 AM Inj       : 1
                                           Inj Volume: No inj
Method          : C:\Users\Public\Documents\ChemStation\1\Methods\AERF_LC.M
Last changed    : 12/2/2020 10:28:53 AM by SYSTEM
                  (modified after loading)
=====
```

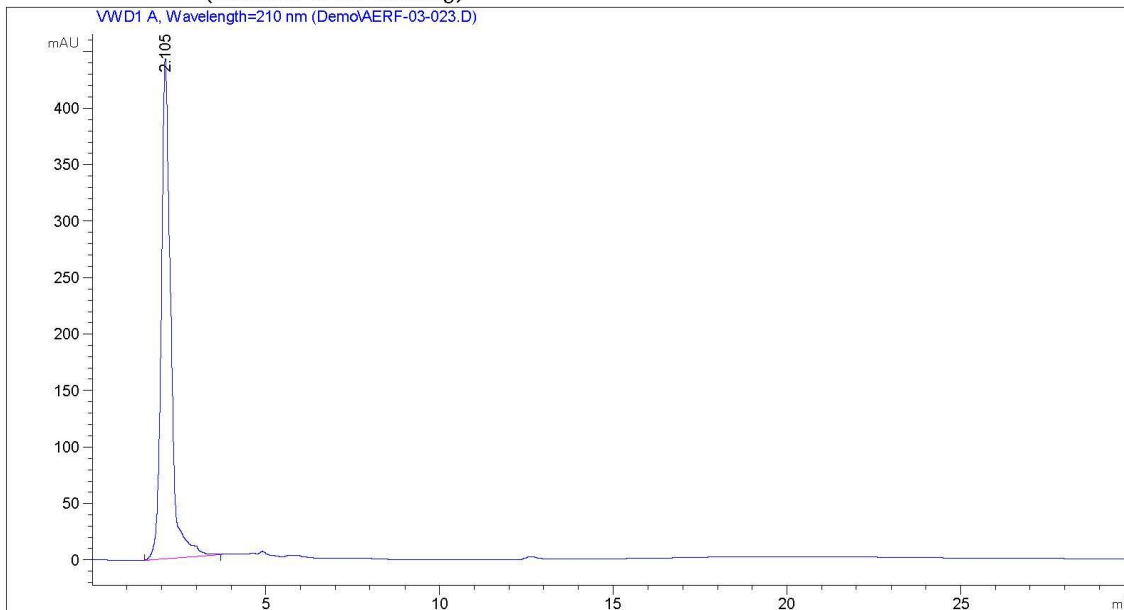

```
=====
                          Area Percent Report
=====
```

```
Sorted By      : Signal
Multiplier     : 1.0000
Dilution       : 1.0000
Use Multiplier & Dilution Factor with ISTDs
```

Signal 1: VWD1 A, Wavelength=210 nm

| Peak # | RetTime [min] | Type | Width [min] | Area [mAU*s] | Height [mAU] | Area %   |
|--------|---------------|------|-------------|--------------|--------------|----------|
| 1      | 2.105         | BV R | 0.2686      | 8444.32617   | 442.47632    | 100.0000 |

```
Totals :                8444.32617  442.47632
```

```
=====
*** End of Report ***
```

### HPLC trace of Compound 11

Data File C:\Users\Public\Documents\ChemStation\1\Data\Demo\AERF-03-046.D  
Sample Name:

```
=====
Acq. Operator   : SYSTEM
Sample Operator : SYSTEM
Acq. Instrument : Shared 1220           Location : 1
Injection Date  : 1/5/2021 2:48:19 PM Inj       : 1
                                           Inj Volume : No inj
Acq. Method     : C:\Users\Public\Documents\ChemStation\1\Methods\DEF_LC.M
Last changed    : 1/5/2021 2:47:56 PM by SYSTEM
                 (modified after loading)
Analysis Method : C:\Users\Public\Documents\ChemStation\1\Methods\DEF_LC.M
Last changed    : 1/5/2021 2:46:30 PM by SYSTEM
                 (modified after loading) (Current integration events modified)
=====
```

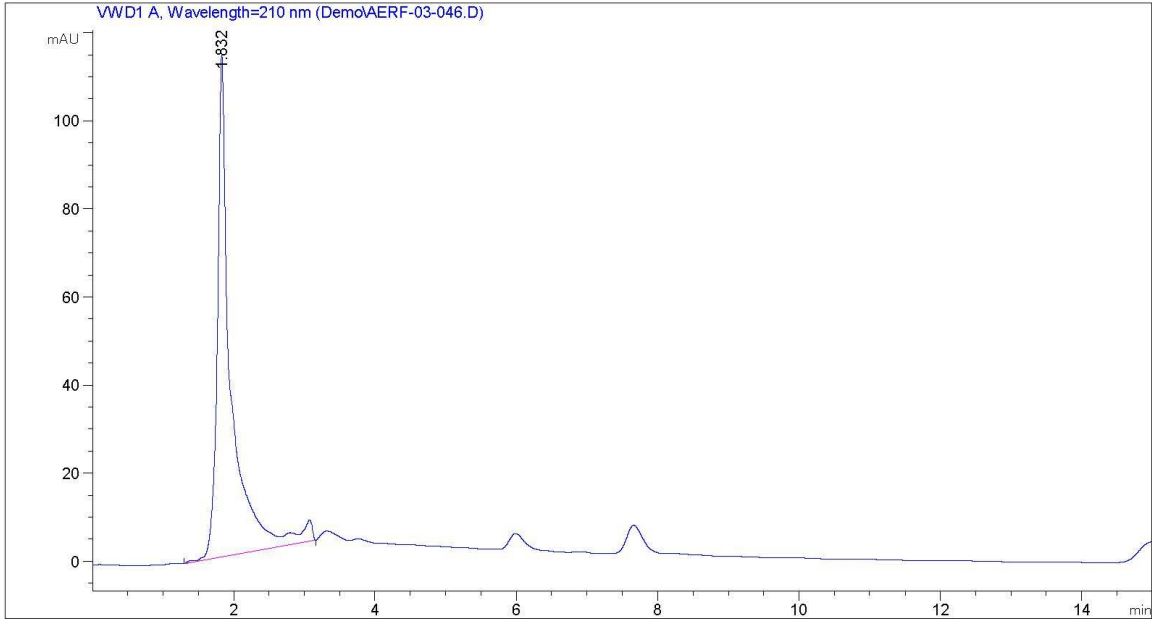

=====  
Area Percent Report  
=====

```
Sorted By      : Signal
Multiplier     : 1.0000
Dilution       : 1.0000
Use Multiplier & Dilution Factor with ISTDs
```

Signal 1: VWD1 A, Wavelength=210 nm

| Peak # | RetTime [min] | Type | Width [min] | Area [mAU*s] | Height [mAU] | Area %   |
|--------|---------------|------|-------------|--------------|--------------|----------|
| 1      | 1.832         | BV R | 0.1763      | 1524.75305   | 113.84121    | 100.0000 |

Totals :                    1524.75305  113.84121

### HPLC trace of Compound 17

Data File C:\Users\P...tion\1\Data\Grant\gns-09-166 Trost Silver (1) 2020-07-27 15-07-02.D  
 Sample Name: gns-09-166 Trost Silver

```

=====
Acq. Operator   : SYSTEM
Sample Operator : SYSTEM
Acq. Instrument : Shared 1220           Location : 1
Injection Date  : 7/27/2020 3:07:03 PM Inj       : 1
                                           Inj Volume: No inj
Method          : C:\Users\Public\Documents\ChemStation\1\Methods\DEF_LC.M
Last changed    : 7/27/2020 3:16:31 PM by SYSTEM
                 (modified after loading)
Sample Info     : Asymmetric Reaction Analysis. Chiracel OJ-H 5:95 IPA:Hex 2mL/min
  
```

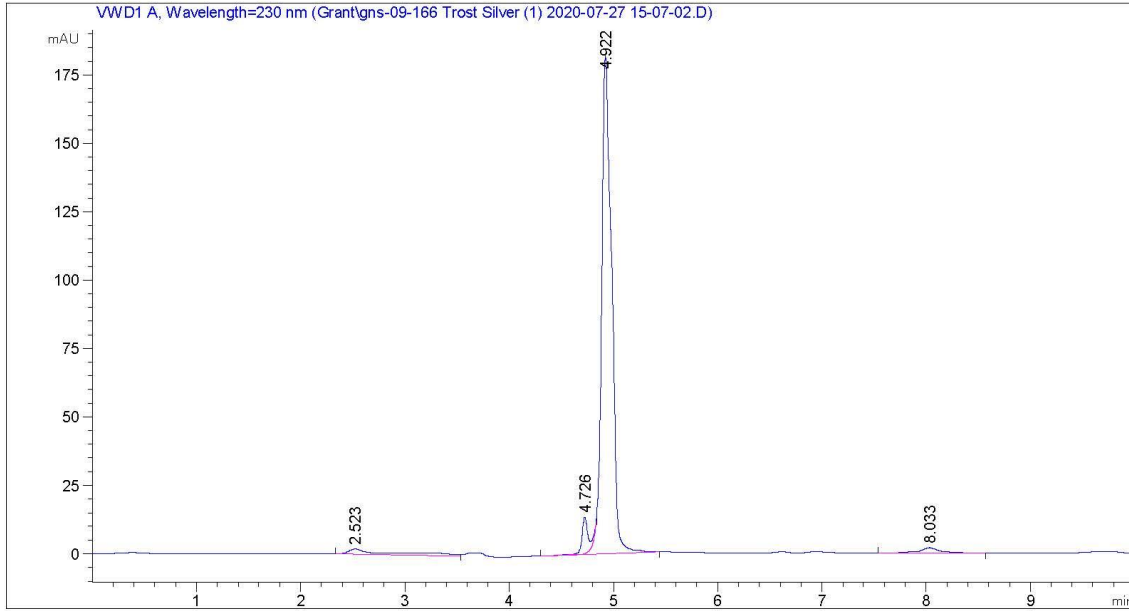

=====  
 Area Percent Report  
 =====

```

Sorted By      : Signal
Multiplier     : 1.0000
Dilution       : 1.0000
Use Multiplier & Dilution Factor with ISTDs
  
```

Signal 1: WVD1 A, Wavelength=230 nm

| Peak # | RetTime [min] | Type | Width [min] | Area [mAU*s] | Height [mAU] | Area %  |
|--------|---------------|------|-------------|--------------|--------------|---------|
| 1      | 2.523         | BV   | 0.3786      | 54.47862     | 1.84451      | 4.0237  |
| 2      | 4.726         | BV E | 0.0599      | 55.05247     | 13.41618     | 4.0661  |
| 3      | 4.922         | VB R | 0.0941      | 1220.58765   | 182.37109    | 90.1507 |
| 4      | 8.033         | BB   | 0.1812      | 23.82263     | 1.83874      | 1.7595  |

Totals : 1353.94137 199.47052

HPLC trace of Compound 27

```

=====
Acq. Operator   : SYSTEM
Sample Operator : SYSTEM
Acq. Instrument : Shared 1220           Location : 1
Injection Date  : 6/4/2019 12:25:37 PM Inj       : 1
                                           Inj Volume: No inj
Acq. Method     : C:\Users\Public\Documents\ChemStation\1\Methods\HILIC_analytical_run.M
Last changed    : 6/4/2019 12:22:13 PM by SYSTEM
                 (modified after loading)
Analysis Method : C:\Users\Public\Documents\ChemStation\1\Methods\HILIC_analytical_run.M
Last changed    : 6/4/2019 12:57:31 PM by SYSTEM
Additional Info : Peak(s) manually integrated
  
```

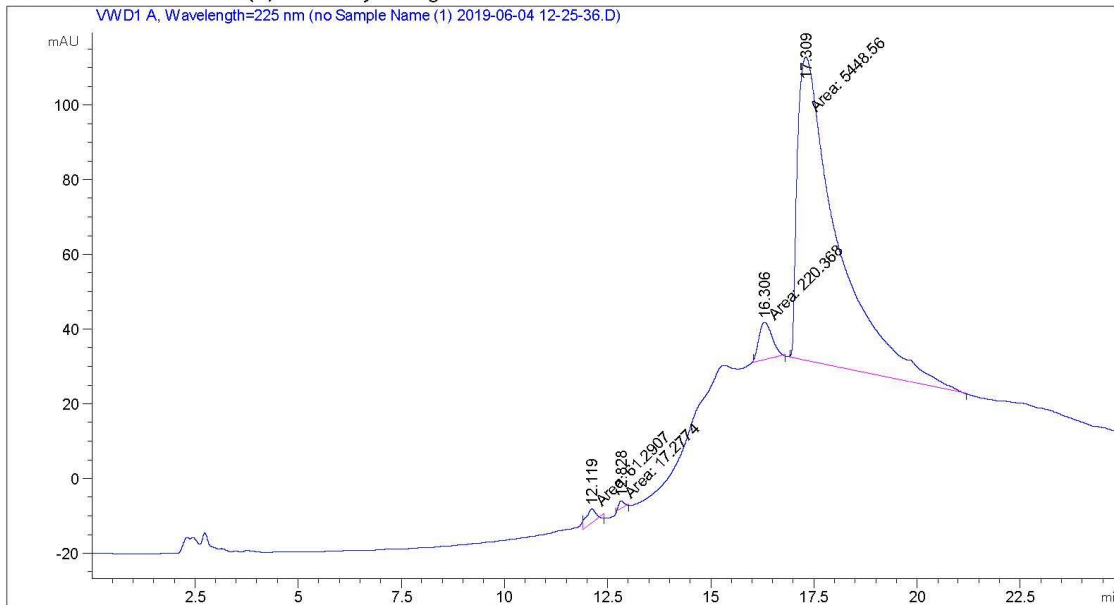

=====  
 Area Percent Report  
 =====

```

Sorted By      : Signal
Multiplier     : 1.0000
Dilution       : 1.0000
Use Multiplier & Dilution Factor with ISTDs
  
```

Signal 1: VWD1 A, Wavelength=225 nm

| Peak # | RetTime [min] | Type | Width [min] | Area [mAU*s] | Height [mAU] | Area %  |
|--------|---------------|------|-------------|--------------|--------------|---------|
| 1      | 12.119        | MM   | 0.2725      | 61.29074     | 3.74926      | 1.0664  |
| 2      | 12.828        | MM   | 0.1398      | 17.27742     | 2.05988      | 0.3006  |
| 3      | 16.306        | MM   | 0.3701      | 220.36827    | 9.92279      | 3.8342  |
| 4      | 17.309        | MM   | 1.1195      | 5448.56006   | 81.11897     | 94.7988 |

Totals : 5747.49649 96.85090

HPLC trace of Compound 29

Data File C:\Users\Public\Documents\ChemStation\1\Data\no Sample Name (1) 2019-06-04 12-25-36.D  
 Sample Name:

```

=====
Acq. Operator   : SYSTEM
Sample Operator : SYSTEM
Acq. Instrument : Shared 1220           Location : 1
Injection Date  : 6/4/2019 12:25:37 PM      Inj : 1
                                           Inj Volume : No inj

Acq. Method     : C:\Users\Public\Documents\ChemStation\1\Methods\HILIC_analytical_run.M
Last changed    : 6/4/2019 12:22:13 PM by SYSTEM
                 (modified after loading)
Analysis Method : C:\Users\Public\Documents\ChemStation\1\Methods\HILIC_analytical_run.M
Last changed    : 6/4/2019 12:57:31 PM by SYSTEM
Additional Info  : Peak(s) manually integrated
  
```

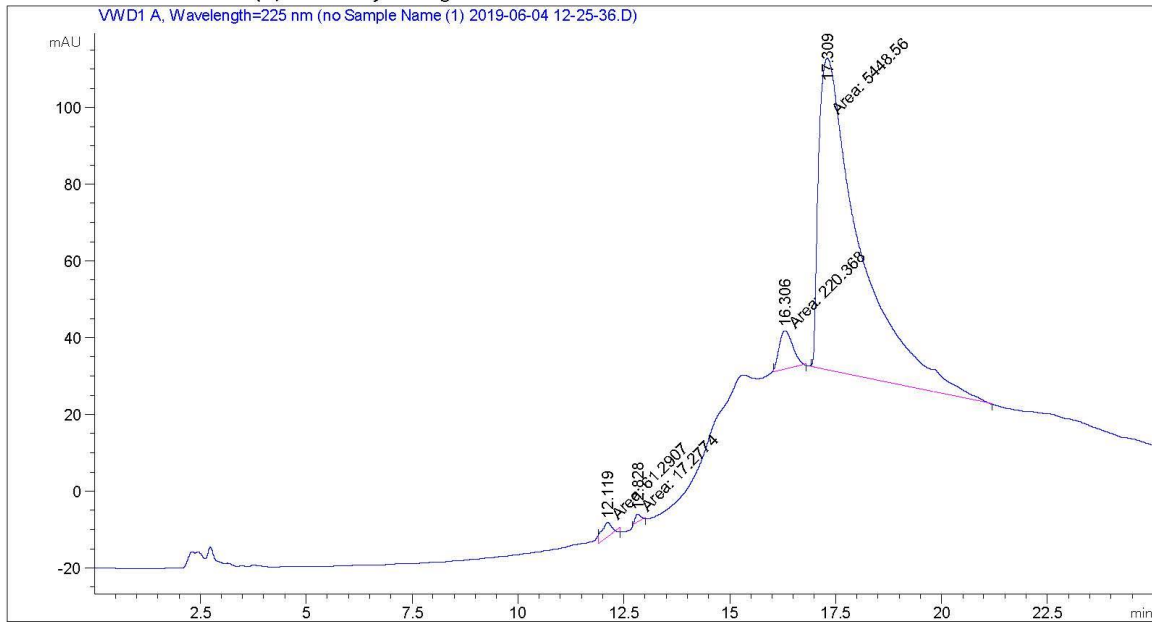

Area Percent Report

```

Sorted By      : Signal
Multiplier     : 1.0000
Dilution       : 1.0000
Use Multiplier & Dilution Factor with ISTDs
  
```

Signal 1: VWD1 A, Wavelength=225 nm

| Peak # | RetTime [min] | Type | Width [min] | Area [mAU*s] | Height [mAU] | Area %  |
|--------|---------------|------|-------------|--------------|--------------|---------|
| 1      | 12.119        | MM   | 0.2725      | 61.29074     | 3.74926      | 1.0664  |
| 2      | 12.828        | MM   | 0.1398      | 17.27742     | 2.05988      | 0.3006  |
| 3      | 16.306        | MM   | 0.3701      | 220.36827    | 9.92279      | 3.8342  |
| 4      | 17.309        | MM   | 1.1195      | 5448.56006   | 81.11897     | 94.7988 |

Totals : 5747.49649 96.85090

HPLC trace of Compound 31



Data File C:\Users\P...cuments\ChemStation\1\Data\no Sample Name (1) 2019-12-30 14-46-34.D  
Sample Name:

```
=====
Acq. Operator   : SYSTEM
Sample Operator : SYSTEM
Acq. Instrument : Shared 1220           Location : 1
Injection Date  : 12/30/2019 2:46:35 PM Inj       : 1
                                           Inj Volume: No inj
Acq. Method     : C:\Users\Public\Documents\ChemStation\1\Methods\CMS-C18A.M
Last changed    : 12/30/2019 2:53:18 PM by SYSTEM
                 (modified after loading)
Analysis Method : C:\USERS\PUBLIC\DOCUMENTS\CHEMSTATION\1\METHODS\BMD TTI918.M
Last changed    : 12/30/2019 2:39:49 PM by SYSTEM
                 (modified after loading)
Additional Info : Peak(s) manually integrated
=====
```

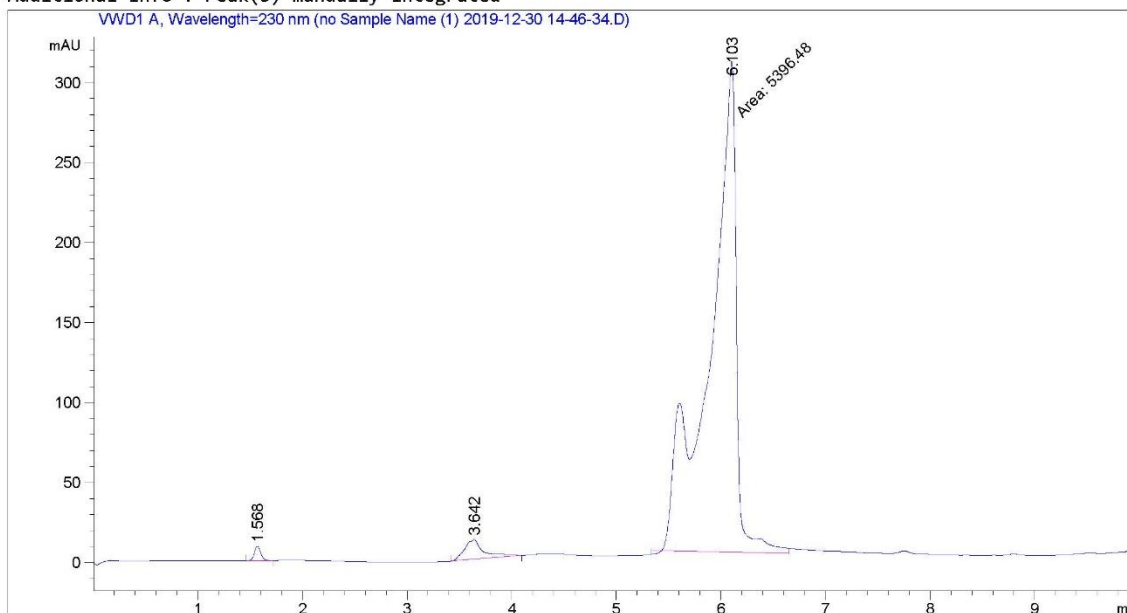

```
=====
                          Area Percent Report
=====
```

```
Sorted By      : Signal
Multiplier     : 1.0000
Dilution       : 1.0000
Do not use Multiplier & Dilution Factor with ISTDs
```

Signal 1: VWD1 A, Wavelength=230 nm

| Peak # | RetTime [min] | Type | Width [min] | Area [mAU*s] | Height [mAU] | Area %  |
|--------|---------------|------|-------------|--------------|--------------|---------|
| 1      | 1.568         | BB   | 0.0629      | 36.81658     | 8.96037      | 0.6590  |
| 2      | 3.642         | BB   | 0.1597      | 153.17264    | 12.18526     | 2.7418  |
| 3      | 6.103         | MM   | 0.2932      | 5396.48389   | 306.72931    | 96.5991 |

Totals : 5586.47311 327.87493

### HPLC trace of Compound 37
